# Supplementary material
Source: publisher figshare collection journal article supplement (https://acs.figshare.com/ndownloader/files/9112096)
Supplement: Supplementary file 1 [file 9112096]

data_0927-whs-90-xds
_audit_creation_date              2016-11-17
_audit_creation_method
;
Olex2 1.2-alpha
(compiled 2016.02.24 svn.r3266 for OlexSys, GUI svn.r5155)
;
_shelxl_version_number            2014-3
_publ_contact_author_address      ?
_publ_contact_author_email        ?
_publ_contact_author_id_orcid     ?
_publ_contact_author_name         ''
_publ_contact_author_phone        ?
_publ_section_references
;
Dolomanov, O.V., Bourhis, L.J., Gildea, R.J, Howard, J.A.K. & Puschmann, H.
 (2009), J. Appl. Cryst. 42, 339-341.

Sheldrick, G.M. (2008). Acta Cryst. A64, 112-122.
;
_chemical_name_common             ?
_chemical_name_systematic
;
 ?
;
_chemical_formula_moiety          'C16 H13 N O2'
_chemical_formula_sum             'C16 H13 N O2'
_chemical_formula_weight          251.27
_chemical_melting_point           ?
loop_
  _atom_type_symbol
  _atom_type_description
  _atom_type_scat_dispersion_real
  _atom_type_scat_dispersion_imag
  _atom_type_scat_source
 'C' 'C' 0.0033 0.0016 'International Tables Vol C Tables 4.2.6.8 and 6.1.1.4'
 'H' 'H' 0.0000 0.0000 'International Tables Vol C Tables 4.2.6.8 and 6.1.1.4'
 'N' 'N' 0.0061 0.0033 'International Tables Vol C Tables 4.2.6.8 and 6.1.1.4'
 'O' 'O' 0.0106 0.0060 'International Tables Vol C Tables 4.2.6.8 and 6.1.1.4'

_shelx_space_group_comment
;
The symmetry employed for this shelxl refinement is uniquely defined
by the following loop, which should always be used as a source of
symmetry information in preference to the above space-group names.
They are only intended as comments.
;
_space_group_crystal_system       'monoclinic'
_space_group_IT_number            14
_space_group_name_H-M_alt         'P 1 21/c 1'
_space_group_name_Hall            '-P 2ybc'
loop_
  _space_group_symop_operation_xyz
 'x, y, z'
 '-x, y+1/2, -z+1/2'
 '-x, -y, -z'
 'x, -y-1/2, z-1/2'

_cell_length_a                    9.1014(5)
_cell_length_b                    5.8581(4)
_cell_length_c                    23.9958(12)
_cell_angle_alpha                 90
_cell_angle_beta                  95.595(5)
_cell_angle_gamma                 90
_cell_volume                      1273.29(13)
_cell_formula_units_Z             4
_cell_measurement_reflns_used     1685
_cell_measurement_temperature     296.15
_cell_measurement_theta_max       28.4832
_cell_measurement_theta_min       3.2316
_shelx_estimated_absorpt_T_max    ?
_shelx_estimated_absorpt_T_min    ?
_exptl_absorpt_coefficient_mu     0.087
_exptl_absorpt_correction_T_max   1.00000
_exptl_absorpt_correction_T_min   0.34586
_exptl_absorpt_correction_type    multi-scan
_exptl_absorpt_process_details
;
CrysAlisPro, Agilent Technologies,
Version 1.171.35.21 (release 20-01-2012 CrysAlis171 .NET)
(compiled Jan 23 2012,18:06:46)
Empirical absorption correction using spherical harmonics,
 implemented in SCALE3 ABSPACK scaling algorithm.
;
_exptl_crystal_colour             'metallic light colourless'
_exptl_crystal_colour_lustre      metallic
_exptl_crystal_colour_modifier    light
_exptl_crystal_colour_primary     colourless
_exptl_crystal_density_diffrn     1.311
_exptl_crystal_density_meas       ?
_exptl_crystal_density_method     ?
_exptl_crystal_description        block
_exptl_crystal_F_000              528
_exptl_crystal_size_max           0.21
_exptl_crystal_size_mid           0.19
_exptl_crystal_size_min           0.17
_exptl_special_details
;
 ?
;
_exptl_transmission_factor_max    ?
_exptl_transmission_factor_min    ?
_diffrn_reflns_av_R_equivalents   0.0303
_diffrn_reflns_av_unetI/netI      0.0462
_diffrn_reflns_Laue_measured_fraction_full 0.998
_diffrn_reflns_Laue_measured_fraction_max 0.907
_diffrn_reflns_limit_h_max        11
_diffrn_reflns_limit_h_min        -11
_diffrn_reflns_limit_k_max        7
_diffrn_reflns_limit_k_min        -7
_diffrn_reflns_limit_l_max        32
_diffrn_reflns_limit_l_min        -31
_diffrn_reflns_number             7291
_diffrn_reflns_point_group_measured_fraction_full 0.998
_diffrn_reflns_point_group_measured_fraction_max 0.907
_diffrn_reflns_theta_full         25.242
_diffrn_reflns_theta_max          28.543
_diffrn_reflns_theta_min          3.412
_diffrn_ambient_temperature       296.15
_diffrn_detector_area_resol_mean  15.9784
_diffrn_measured_fraction_theta_full 0.998
_diffrn_measured_fraction_theta_max 0.907
_diffrn_measurement_details
;
#__ type_ start__ end____ width___ exp.time_
  1 omega  -76.00   -8.00   1.0000   23.0000
omega____ theta____ kappa____ phi______ frames
    -      -20.2889  -77.0000  150.0000 68

#__ type_ start__ end____ width___ exp.time_
  2 omega  -76.00  -39.00   1.0000   23.0000
omega____ theta____ kappa____ phi______ frames
    -      -20.2889 -178.0000    0.0000 37

#__ type_ start__ end____ width___ exp.time_
  3 omega   41.00   90.00   1.0000   23.0000
omega____ theta____ kappa____ phi______ frames
    -       21.3827   57.0000   30.0000 49

#__ type_ start__ end____ width___ exp.time_
  4 omega  -44.00   38.00   1.0000   23.0000
omega____ theta____ kappa____ phi______ frames
    -       21.3827  -77.0000 -120.0000 82

#__ type_ start__ end____ width___ exp.time_
  5 omega  -12.00   74.00   1.0000   23.0000
omega____ theta____ kappa____ phi______ frames
    -       21.3827   77.0000  -90.0000 86
;
_diffrn_measurement_device_type   'SuperNova, Single source at offset), Eos'
_diffrn_measurement_method        '\w scans'
_diffrn_orient_matrix_UB_11       -0.0657345000
_diffrn_orient_matrix_UB_12       0.0164835000
_diffrn_orient_matrix_UB_13       -0.0180073000
_diffrn_orient_matrix_UB_21       0.0420098000
_diffrn_orient_matrix_UB_22       0.0449639000
_diffrn_orient_matrix_UB_23       -0.0208712000
_diffrn_orient_matrix_UB_31       0.0072256000
_diffrn_orient_matrix_UB_32       -0.1111014000
_diffrn_orient_matrix_UB_33       -0.0110957000
_diffrn_radiation_monochromator   mirror
_diffrn_radiation_type            MoK\a
_diffrn_radiation_wavelength      0.71073
_diffrn_source                    'SuperNova (Mo) X-ray Source'
_reflns_Friedel_coverage          0.000
_reflns_Friedel_fraction_full     .
_reflns_Friedel_fraction_max      .
_reflns_number_gt                 1813
_reflns_number_total              2937
_reflns_odcompleteness_completeness 99.69
_reflns_odcompleteness_iscentric  1
_reflns_odcompleteness_theta      26.32
_reflns_special_details
;
 Reflections were merged by SHELXL according to the crystal
 class for the calculation of statistics and refinement.
 
 _reflns_Friedel_fraction is defined as the number of unique
 Friedel pairs measured divided by the number that would be
 possible theoretically, ignoring centric projections and
 systematic absences.
;
_reflns_threshold_expression      'I > 2\s(I)'
_computing_cell_refinement
;
CrysAlisPro, Agilent Technologies,
Version 1.171.35.21 (release 20-01-2012 CrysAlis171 .NET)
(compiled Jan 23 2012,18:06:46)
;
_computing_data_collection
;
CrysAlisPro, Agilent Technologies,
Version 1.171.35.21 (release 20-01-2012 CrysAlis171 .NET)
(compiled Jan 23 2012,18:06:46)
;
_computing_data_reduction
;
CrysAlisPro, Agilent Technologies,
Version 1.171.35.21 (release 20-01-2012 CrysAlis171 .NET)
(compiled Jan 23 2012,18:06:46)
;
_computing_molecular_graphics     'Olex2 (Dolomanov et al., 2009)'
_computing_publication_material   'Olex2 (Dolomanov et al., 2009)'
_computing_structure_refinement   'XL (Sheldrick, 2008)'
_computing_structure_solution     'XS (Sheldrick, 2008)'
_refine_diff_density_max          0.139
_refine_diff_density_min          -0.217
_refine_diff_density_rms          0.041
_refine_ls_extinction_coef        .
_refine_ls_extinction_method      none
_refine_ls_goodness_of_fit_ref    1.069
_refine_ls_hydrogen_treatment     constr
_refine_ls_matrix_type            full
_refine_ls_number_parameters      172
_refine_ls_number_reflns          2937
_refine_ls_number_restraints      0
_refine_ls_R_factor_all           0.0946
_refine_ls_R_factor_gt            0.0558
_refine_ls_restrained_S_all       1.069
_refine_ls_shift/su_max           0.001
_refine_ls_shift/su_mean          0.000
_refine_ls_structure_factor_coef  Fsqd
_refine_ls_weighting_details
'w=1/[\s^2^(Fo^2^)+(0.0435P)^2^+0.2488P] where P=(Fo^2^+2Fc^2^)/3'
_refine_ls_weighting_scheme       calc
_refine_ls_wR_factor_gt           0.1188
_refine_ls_wR_factor_ref          0.1427
_refine_special_details
;
 ?
;
_olex2_refinement_description
;
1. Others
 Fixed Uiso: H3(0.048) H1(0.056) H16(0.058) H6(0.07) H10A(0.058) H10B(0.058)
 H9(0.061) H12(0.065) H14(0.074) H7(0.084) H8(0.079) H15(0.071) H13(0.077)
 Fixed X: H3(-0.0601) H1(-0.1057) H16(-0.3277) H6(0.3338) H10A(-0.2166) H10B(-
 0.1253) H9(0.0596) H12(-0.3657) H14(-0.6655) H7(0.3546) H8(0.2172) H15(-
 0.5391) H13(-0.5805)
 Fixed Y: H3(0.5853) H1(0.1855) H16(0.2321) H6(0.0497) H10A(0.4919)
 H10B(0.6367) H9(0.7175) H12(0.8544) H14(0.6349) H7(0.3135) H8(0.6454)
 H15(0.2966) H13(0.9117)
 Fixed Z: H3(0.1307) H1(0.0234) H16(0.0965) H6(0.2395) H10A(-0.012)
 H10B(0.0339) H9(0.2257) H12(0.0288) H14(0.1268) H7(0.3114) H8(0.3041)
 H15(0.1403) H13(0.0707)
;
_atom_sites_solution_hydrogens    geom
_atom_sites_solution_primary      direct
_atom_sites_solution_secondary    ?
loop_
  _atom_site_label
  _atom_site_type_symbol
  _atom_site_fract_x
  _atom_site_fract_y
  _atom_site_fract_z
  _atom_site_U_iso_or_equiv
  _atom_site_adp_type
  _atom_site_occupancy
  _atom_site_site_symmetry_order
  _atom_site_calc_flag
  _atom_site_refinement_flags_posn
  _atom_site_refinement_flags_adp
  _atom_site_refinement_flags_occupancy
  _atom_site_disorder_assembly
  _atom_site_disorder_group
 O1 O 0.17513(15) 0.0685(3) 0.14723(6) 0.0506(4) Uani 1 1 d . . . . .
 C3 C -0.0010(2) 0.4557(4) 0.13461(7) 0.0404(5) Uani 1 1 d . . . . .
 H3 H -0.0601 0.5853 0.1307 0.048 Uiso 1 1 calc R . . . .
 N1 N -0.10014(17) 0.3038(3) 0.04471(6) 0.0470(5) Uani 1 1 d . . . . .
 H1 H -0.1057 0.1855 0.0234 0.056 Uiso 1 1 calc R . . . .
 C1 C 0.0859(2) 0.0959(4) 0.09906(8) 0.0445(5) Uani 1 1 d . . . . .
 C2 C -0.00936(19) 0.2973(4) 0.09336(7) 0.0383(5) Uani 1 1 d . . . . .
 C4 C 0.0977(2) 0.4260(4) 0.18406(7) 0.0397(5) Uani 1 1 d . . . . .
 C5 C 0.1829(2) 0.2287(4) 0.18994(8) 0.0442(5) Uani 1 1 d . . . . .
 O2 O 0.09030(18) -0.0497(3) 0.06340(6) 0.0650(5) Uani 1 1 d . . . . .
 C11 C -0.3239(2) 0.5360(4) 0.05778(7) 0.0398(5) Uani 1 1 d . . . . .
 C16 C -0.3774(2) 0.3704(4) 0.09132(8) 0.0484(5) Uani 1 1 d . . . . .
 H16 H -0.3277 0.2321 0.0965 0.058 Uiso 1 1 calc R . . . .
 C6 C 0.2787(2) 0.1836(5) 0.23682(9) 0.0585(6) Uani 1 1 d . . . . .
 H6 H 0.3338 0.0497 0.2395 0.070 Uiso 1 1 calc R . . . .
 C10 C -0.1872(2) 0.5024(4) 0.02783(8) 0.0482(5) Uani 1 1 d . . . . .
 H10A H -0.2166 0.4919 -0.0120 0.058 Uiso 1 1 calc R . . . .
 H10B H -0.1253 0.6367 0.0339 0.058 Uiso 1 1 calc R . . . .
 C9 C 0.1138(2) 0.5826(4) 0.22818(8) 0.0510(6) Uani 1 1 d . . . . .
 H9 H 0.0596 0.7175 0.2257 0.061 Uiso 1 1 calc R . . . .
 C12 C -0.4007(2) 0.7398(4) 0.05086(9) 0.0541(6) Uani 1 1 d . . . . .
 H12 H -0.3657 0.8544 0.0288 0.065 Uiso 1 1 calc R . . . .
 C14 C -0.5798(2) 0.6105(5) 0.10950(10) 0.0613(7) Uani 1 1 d . . . . .
 H14 H -0.6655 0.6349 0.1268 0.074 Uiso 1 1 calc R . . . .
 C7 C 0.2908(3) 0.3408(5) 0.27944(10) 0.0697(8) Uani 1 1 d . . . . .
 H7 H 0.3546 0.3135 0.3114 0.084 Uiso 1 1 calc R . . . .
 C8 C 0.2083(3) 0.5399(5) 0.27506(9) 0.0659(7) Uani 1 1 d . . . . .
 H8 H 0.2172 0.6454 0.3041 0.079 Uiso 1 1 calc R . . . .
 C15 C -0.5046(2) 0.4086(4) 0.11737(10) 0.0595(6) Uani 1 1 d . . . . .
 H15 H -0.5391 0.2966 0.1403 0.071 Uiso 1 1 calc R . . . .
 C13 C -0.5290(3) 0.7751(5) 0.07633(10) 0.0645(7) Uani 1 1 d . . . . .
 H13 H -0.5805 0.9117 0.0707 0.077 Uiso 1 1 calc R . . . .

loop_
  _atom_site_aniso_label
  _atom_site_aniso_U_11
  _atom_site_aniso_U_22
  _atom_site_aniso_U_33
  _atom_site_aniso_U_23
  _atom_site_aniso_U_13
  _atom_site_aniso_U_12
 O1 0.0516(8) 0.0527(10) 0.0472(8) -0.0059(7) 0.0030(7) 0.0101(7)
 C3 0.0388(10) 0.0435(12) 0.0395(10) -0.0011(9) 0.0077(8) 0.0017(9)
 N1 0.0438(9) 0.0588(12) 0.0379(9) -0.0113(8) 0.0010(7) 0.0030(8)
 C1 0.0442(11) 0.0493(14) 0.0410(11) -0.0072(10) 0.0079(9) -0.0024(10)
 C2 0.0341(9) 0.0470(13) 0.0347(10) -0.0032(9) 0.0081(8) -0.0027(9)
 C4 0.0402(10) 0.0461(13) 0.0336(10) -0.0011(9) 0.0074(8) -0.0052(9)
 C5 0.0409(11) 0.0539(14) 0.0386(10) -0.0012(10) 0.0077(9) -0.0021(10)
 O2 0.0765(11) 0.0605(12) 0.0575(9) -0.0208(8) 0.0031(8) 0.0130(9)
 C11 0.0345(10) 0.0504(13) 0.0335(9) -0.0007(9) -0.0012(8) -0.0037(9)
 C16 0.0445(11) 0.0476(14) 0.0534(12) 0.0052(11) 0.0064(9) -0.0018(10)
 C6 0.0548(13) 0.0658(17) 0.0532(13) 0.0054(12) -0.0027(11) 0.0066(12)
 C10 0.0427(11) 0.0638(15) 0.0379(10) 0.0041(10) 0.0036(9) -0.0023(10)
 C9 0.0559(13) 0.0568(15) 0.0406(11) -0.0063(10) 0.0054(10) -0.0016(11)
 C12 0.0553(13) 0.0532(15) 0.0531(13) 0.0099(11) 0.0016(10) 0.0014(11)
 C14 0.0375(12) 0.080(2) 0.0677(15) -0.0098(14) 0.0092(10) -0.0013(12)
 C7 0.0643(15) 0.093(2) 0.0488(13) -0.0006(14) -0.0109(12) -0.0012(15)
 C8 0.0733(17) 0.078(2) 0.0441(13) -0.0138(13) -0.0029(12) -0.0057(14)
 C15 0.0477(13) 0.0662(17) 0.0671(15) 0.0061(13) 0.0175(11) -0.0088(12)
 C13 0.0511(13) 0.0646(18) 0.0767(16) -0.0023(14) 0.0006(12) 0.0141(12)

_geom_special_details
;
 All esds (except the esd in the dihedral angle between two l.s. planes)
 are estimated using the full covariance matrix.  The cell esds are taken
 into account individually in the estimation of esds in distances, angles
 and torsion angles; correlations between esds in cell parameters are only
 used when they are defined by crystal symmetry.  An approximate (isotropic)
 treatment of cell esds is used for estimating esds involving l.s. planes.
;
loop_
  _geom_bond_atom_site_label_1
  _geom_bond_atom_site_label_2
  _geom_bond_distance
  _geom_bond_site_symmetry_2
  _geom_bond_publ_flag
 O1 C1 1.356(2) . ?
 O1 C5 1.386(2) . ?
 C3 C2 1.353(3) . ?
 C3 C4 1.427(3) . ?
 N1 C2 1.363(2) . ?
 N1 C10 1.443(3) . ?
 C1 C2 1.463(3) . ?
 C1 O2 1.211(2) . ?
 C4 C5 1.392(3) . ?
 C4 C9 1.398(3) . ?
 C5 C6 1.380(3) . ?
 C11 C16 1.379(3) . ?
 C11 C10 1.509(3) . ?
 C11 C12 1.386(3) . ?
 C16 C15 1.386(3) . ?
 C6 C7 1.373(3) . ?
 C9 C8 1.371(3) . ?
 C12 C13 1.385(3) . ?
 C14 C15 1.371(3) . ?
 C14 C13 1.360(3) . ?
 C7 C8 1.385(4) . ?

loop_
  _geom_angle_atom_site_label_1
  _geom_angle_atom_site_label_2
  _geom_angle_atom_site_label_3
  _geom_angle
  _geom_angle_site_symmetry_1
  _geom_angle_site_symmetry_3
  _geom_angle_publ_flag
 C1 O1 C5 122.23(17) . . ?
 C2 C3 C4 120.72(19) . . ?
 C2 N1 C10 122.19(18) . . ?
 O1 C1 C2 118.38(17) . . ?
 O2 C1 O1 117.4(2) . . ?
 O2 C1 C2 124.17(19) . . ?
 C3 C2 N1 126.41(19) . . ?
 C3 C2 C1 119.60(17) . . ?
 N1 C2 C1 113.99(17) . . ?
 C5 C4 C3 118.98(18) . . ?
 C5 C4 C9 116.89(18) . . ?
 C9 C4 C3 124.1(2) . . ?
 O1 C5 C4 119.99(17) . . ?
 C6 C5 O1 117.1(2) . . ?
 C6 C5 C4 122.9(2) . . ?
 C16 C11 C10 122.7(2) . . ?
 C16 C11 C12 118.26(19) . . ?
 C12 C11 C10 119.01(19) . . ?
 C11 C16 C15 120.5(2) . . ?
 C7 C6 C5 118.5(2) . . ?
 N1 C10 C11 115.26(17) . . ?
 C8 C9 C4 120.9(2) . . ?
 C13 C12 C11 120.9(2) . . ?
 C13 C14 C15 119.9(2) . . ?
 C6 C7 C8 120.3(2) . . ?
 C9 C8 C7 120.5(2) . . ?
 C14 C15 C16 120.3(2) . . ?
 C14 C13 C12 120.1(2) . . ?

_iucr_refine_instructions_details
;
TITL 0927-WHS-90-XDS in P21/c #14
REM reset to P21/c #14
CELL 0.71073 9.101431 5.858101 23.995852 90 95.5946 90
ZERR 4 0.000538 0.000385 0.001162 0 0.0051 0
LATT 1
SYMM -X,0.5+Y,0.5-Z
SFAC C H N O
UNIT 64 52 4 8
 
L.S. 4 0 0
PLAN  20
TEMP 23
BOND
fmap 2
acta
REM <olex2.extras>
REM <HklSrc "%.\\0927-WHS-90-XDS.hkl">
REM </olex2.extras>
 
WGHT    0.043500    0.248800
FVAR       7.16850
O1    4    0.175125    0.068486    0.147232    11.00000    0.05161    0.05274 =
         0.04721   -0.00589    0.00303    0.01010
C3    1   -0.000972    0.455693    0.134607    11.00000    0.03881    0.04349 =
         0.03951   -0.00115    0.00770    0.00174
AFIX  43
H3    2   -0.060122    0.585257    0.130681    11.00000   -1.20000
AFIX   0
N1    3   -0.100142    0.303765    0.044705    11.00000    0.04375    0.05877 =
         0.03791   -0.01129    0.00100    0.00297
AFIX  43
H1    2   -0.105734    0.185525    0.023361    11.00000   -1.20000
AFIX   0
C1    1    0.085933    0.095856    0.099059    11.00000    0.04417    0.04926 =
         0.04096   -0.00723    0.00793   -0.00243
C2    1   -0.009364    0.297313    0.093359    11.00000    0.03415    0.04695 =
         0.03468   -0.00324    0.00807   -0.00265
C4    1    0.097665    0.426039    0.184064    11.00000    0.04016    0.04606 =
         0.03360   -0.00106    0.00735   -0.00516
C5    1    0.182871    0.228679    0.189937    11.00000    0.04093    0.05390 =
         0.03857   -0.00124    0.00770   -0.00207
O2    4    0.090300   -0.049697    0.063400    11.00000    0.07646    0.06054 =
         0.05746   -0.02082    0.00310    0.01303
C11   1   -0.323908    0.535961    0.057784    11.00000    0.03447    0.05041 =
         0.03354   -0.00075   -0.00118   -0.00367
C16   1   -0.377377    0.370380    0.091324    11.00000    0.04451    0.04764 =
         0.05339    0.00525    0.00645   -0.00181
AFIX  43
H16   2   -0.327738    0.232092    0.096511    11.00000   -1.20000
AFIX   0
C6    1    0.278705    0.183552    0.236825    11.00000    0.05479    0.06579 =
         0.05324    0.00535   -0.00266    0.00665
AFIX  43
H6    2    0.333849    0.049664    0.239484    11.00000   -1.20000
AFIX   0
C10   1   -0.187169    0.502439    0.027830    11.00000    0.04273    0.06384 =
         0.03788    0.00415    0.00364   -0.00234
AFIX  23
H10A  2   -0.216609    0.491897   -0.012039    11.00000   -1.20000
H10B  2   -0.125270    0.636661    0.033911    11.00000   -1.20000
AFIX   0
C9    1    0.113769    0.582597    0.228183    11.00000    0.05589    0.05679 =
         0.04058   -0.00631    0.00543   -0.00163
AFIX  43
H9    2    0.059640    0.717483    0.225714    11.00000   -1.20000
AFIX   0
C12   1   -0.400744    0.739815    0.050864    11.00000    0.05534    0.05321 =
         0.05311    0.00989    0.00165    0.00140
AFIX  43
H12   2   -0.365719    0.854428    0.028827    11.00000   -1.20000
AFIX   0
C14   1   -0.579789    0.610504    0.109500    11.00000    0.03755    0.07952 =
         0.06771   -0.00982    0.00922   -0.00127
AFIX  43
H14   2   -0.665478    0.634924    0.126832    11.00000   -1.20000
AFIX   0
C7    1    0.290770    0.340805    0.279444    11.00000    0.06433    0.09272 =
         0.04879   -0.00061   -0.01095   -0.00116
AFIX  43
H7    2    0.354607    0.313524    0.311419    11.00000   -1.20000
AFIX   0
C8    1    0.208345    0.539898    0.275064    11.00000    0.07335    0.07846 =
         0.04411   -0.01376   -0.00285   -0.00570
AFIX  43
H8    2    0.217220    0.645441    0.304149    11.00000   -1.20000
AFIX   0
C15   1   -0.504595    0.408557    0.117370    11.00000    0.04774    0.06616 =
         0.06705    0.00606    0.01745   -0.00878
AFIX  43
H15   2   -0.539071    0.296586    0.140292    11.00000   -1.20000
AFIX   0
C13   1   -0.528999    0.775140    0.076327    11.00000    0.05108    0.06464 =
         0.07673   -0.00227    0.00064    0.01406
AFIX  43
H13   2   -0.580472    0.911667    0.070732    11.00000   -1.20000
AFIX   0
HKLF 4
 
REM  0927-WHS-90-XDS in P21/c #14
REM R1 =  0.0558 for    1813 Fo > 4sig(Fo)  and  0.0946 for all    2937 data
REM    172 parameters refined using      0 restraints
 
END  
     
WGHT      0.0435      0.2488 

REM Highest difference peak  0.139,  deepest hole -0.217,  1-sigma level  0.041
Q1    1  -0.2571  0.2560  0.1212  11.00000  0.05    0.14
Q2    1  -0.0464  0.1845  0.0124  11.00000  0.05    0.14
Q3    1   0.0041  0.5115  0.2771  11.00000  0.05    0.14
Q4    1   0.1470  0.6039  0.3531  11.00000  0.05    0.13
Q5    1  -0.2978  0.9082  0.0530  11.00000  0.05    0.13
Q6    1  -0.2095  0.4016 -0.0206  11.00000  0.05    0.12
Q7    1  -0.3683  0.9360 -0.0203  11.00000  0.05    0.12
Q8    1   0.2292  0.1926  0.3455  11.00000  0.05    0.12
Q9    1  -0.0205  0.8238  0.1559  11.00000  0.05    0.12
Q10   1   0.0550  0.4171  0.1071  11.00000  0.05    0.11
Q11   1   0.0675  0.6282  0.3037  11.00000  0.05    0.11
Q12   1   0.1323  0.9862  0.2866  11.00000  0.05    0.11
Q13   1   0.1325 -0.2677  0.0537  11.00000  0.05    0.11
Q14   1  -0.3970  0.4217  0.0567  11.00000  0.05    0.11
Q15   1  -0.5123  0.3318  0.1687  11.00000  0.05    0.11
Q16   1  -0.0331  0.7390  0.0017  11.00000  0.05    0.11
Q17   1  -0.2966  0.5060 -0.0196  11.00000  0.05    0.11
Q18   1  -0.4791  0.2856  0.1634  11.00000  0.05    0.11
Q19   1   0.3157  0.5080  0.2709  11.00000  0.05    0.11
Q20   1   0.0697 -0.2132  0.1179  11.00000  0.05    0.10

  REM The information below was added by Olex2.
  REM
  REM R1 = 0.0558 for 1813 Fo > 4sig(Fo) and 0.0946 for all 7761 data
  REM n/a parameters refined using n/a restraints
  REM Highest difference peak 0.14, deepest hole -0.22
  REM Mean Shift 0, Max Shift -0.001.
  
  REM +++ Tabular Listing of Refinement Information +++
  REM R1_all = 0.0946
  REM R1_gt = 0.0558
  REM wR_ref = 0.1427
  REM GOOF = 1.069
  REM Shift_max = -0.001
  REM Shift_mean = 0
  REM Reflections_all = 7761
  REM Reflections_gt = 1813
  REM Parameters = n/a
  REM Hole = -0.22
  REM Peak = 0.14
  REM Flack = n/a
;
_olex2_submission_special_instructions 'No special instructions were received'
loop_
  _refln_index_h
  _refln_index_k
  _refln_index_l
  _refln_F_squared_meas
  _refln_F_squared_sigma
  _refln_scale_group_code
 0 0 4 37183.2 840.639 3
 0 0 -5 34.9445 15.9395 5
 0 0 5 58.2894 39.2279 5
 0 0 5 132.319 75.4158 3
 0 0 -5 44.4858 70.8919 3
 0 0 6 426808 3518.56 3
 0 0 -6 433494 2290.76 5
 0 0 6 438068 2895.01 5
 0 0 -7 336.726 78.5636 5
 0 0 7 325.671 100.706 5
 0 0 7 528.327 161.434 3
 0 0 -8 22136.6 476.55 1
 0 0 8 22907.2 941.837 3
 0 0 -8 22544 559.904 5
 0 0 8 21188.1 759.927 5
 0 0 -9 0.61154 19.6591 1
 0 0 9 63.768 64.0323 5
 0 0 -9 81.4216 47.0431 5
 0 0 9 130.894 99.9261 3
 0 0 10 15760.9 889.297 3
 0 0 -10 16085.5 498.537 5
 0 0 -10 16572.5 411.365 1
 0 0 10 16226.7 743.934 5
 0 0 -11 34.4017 25.6882 1
 0 0 11 130.649 83.8971 5
 0 0 11 160.058 121.043 3
 0 0 -11 116.87 58.5798 5
 0 0 12 29741 1348.59 3
 0 0 -12 29067.6 685.741 5
 0 0 12 29921.9 1117.5 5
 0 0 -12 28823.6 537.792 1
 0 0 13 610.546 184.143 5
 0 0 -13 268.396 75.4747 5
 0 0 13 778.278 261.158 3
 0 0 -14 620.783 104.323 5
 0 0 -14 420.486 67.5621 1
 0 0 14 690.448 194.301 5
 0 0 14 645.954 236.596 3
 0 0 -15 245.866 54.4941 1
 0 0 -15 577.194 142.862 2
 0 0 15 686.148 201.292 5
 0 0 15 628.31 259.04 3
 0 0 16 2713.92 491.28 3
 0 0 -16 2990.92 316.873 2
 0 0 -16 2550.62 145.906 1
 0 0 16 2895.07 399.074 5
 0 0 -17 1337.09 236.989 2
 0 0 17 1238.61 271.625 5
 0 0 17 1495.81 405.635 3
 0 0 -18 3761.39 397.277 2
 0 0 18 3968.88 647.137 3
 0 0 -19 2423.36 338.699 2
 0 0 19 2076.98 496.554 3
 0 0 20 2057.49 517.756 3
 0 0 -20 2341.66 357.88 2
 0 0 21 2326.66 552.681 3
 0 0 -21 2484.97 387.631 2
 0 0 22 25816.8 1829.18 3
 0 0 -22 28423.3 1323.63 2
 0 0 23 1740.63 521.051 3
 0 0 -23 1879.51 362.13 2
 0 0 24 20489.4 1722.38 3
 0 0 -24 23715.1 1331.63 2
 0 0 25 844.473 366.991 3
 0 0 -25 819.684 276.356 2
 0 0 26 501.249 285.508 3
 0 0 27 359.779 288.761 3
 0 0 28 1353.49 512.37 3
 0 0 29 444.154 328.789 3
 0 0 30 -92.3203 181.521 3
 0 0 31 232.296 228.388 4
 0 1 0 -21.4629 42.8485 5
 0 1 0 -40.0041 27.4608 4
 0 -1 1 118722 1885.98 4
 0 -1 -1 117834 1785.16 4
 0 1 -1 118736 1931.86 4
 0 1 1 116903 1844.09 4
 0 1 -1 118097 2211.55 5
 0 1 1 113866 2010.54 5
 0 -1 1 117153 2289.95 5
 0 -1 2 102915 2227.09 5
 0 1 2 100498 1705.58 4
 0 1 -2 98452.8 1783.82 4
 0 1 -2 103579 2141.01 5
 0 -1 2 101306 1786.99 4
 0 1 -3 3700.84 424.343 5
 0 1 -3 3870.25 353.619 4
 0 -1 3 3975.79 366.645 4
 0 -1 3 4442.78 480.326 5
 0 1 -4 36539.6 1086.65 4
 0 -1 4 39047.5 1453.39 5
 0 1 4 37924.4 1056.75 2
 0 1 -4 38576.7 1398.65 5
 0 1 -4 37990.9 1147.56 3
 0 -1 4 38496.9 1170.32 4
 0 1 -5 11701.8 662.504 3
 0 1 -5 12573.4 816.926 5
 0 1 5 11266.1 570.806 2
 0 -1 5 11514 817.773 5
 0 -1 5 12657.1 688.921 4
 0 1 -5 11087.9 604.531 4
 0 -1 6 38556.2 1243.14 4
 0 -1 6 37549.8 1520.87 5
 0 1 6 37917.2 1026.47 2
 0 -1 6 36315.3 1265.78 3
 0 -1 -6 36474.9 1120.48 2
 0 1 -6 38497 1454.41 5
 0 1 -7 38040.4 1469.35 5
 0 -1 7 35777.3 1320.03 3
 0 -1 7 37538 1556.77 5
 0 -1 -7 36870.4 1164.56 2
 0 1 7 36616.4 970.34 2
 0 1 7 34363.1 676.564 1
 0 -1 7 36283.7 1266.18 4
 0 -1 8 -33.0082 39.1074 5
 0 -1 8 42.2766 36.4662 4
 0 -1 8 -48.5324 86.4736 3
 0 -1 -8 -24.0302 64.8845 2
 0 1 -8 -39.4794 66.7194 5
 0 1 8 6.16881 12.6738 1
 0 1 -9 6071.53 602.877 5
 0 -1 9 6617.1 622.616 3
 0 -1 -9 6837.36 524.385 2
 0 -1 9 6973.86 588.045 4
 0 1 9 6507.28 526.311 3
 0 -1 9 6417.65 673.293 5
 0 1 9 6363.6 184.242 1
 0 1 10 51.5351 46.6078 3
 0 -1 10 86.2209 87.1475 4
 0 -1 -10 52.4489 27.2503 2
 0 -1 10 54.0702 60.1707 3
 0 1 10 95.2258 25.7957 1
 0 1 -10 90.9364 77.7466 5
 0 1 11 2233.35 166.438 5
 0 1 -11 2016.56 349.861 5
 0 1 11 2892.59 388.96 3
 0 1 11 2341.46 128.129 1
 0 -1 -11 2222.16 317.125 2
 0 -1 11 2478.04 380.908 4
 0 -1 11 2376.96 404.49 3
 0 -1 -12 55296.9 1636.85 2
 0 1 12 58693.5 1821.99 3
 0 1 12 55320.8 943.116 5
 0 -1 12 56494.2 2077.44 3
 0 1 -12 55749.8 1847.46 5
 0 -1 -13 91277.6 2172.41 2
 0 1 13 95659.2 2441.26 3
 0 1 -13 91876 2389.15 5
 0 1 13 92700.4 1349.41 5
 0 -1 13 90013.1 2704.16 3
 0 -1 -14 3569.54 453.738 2
 0 1 14 2879.02 253.495 5
 0 1 -14 2734.68 413.535 5
 0 -1 14 3096.54 534.636 3
 0 1 14 2869.03 440.467 3
 0 -1 15 1709.2 404.273 3
 0 1 -15 1906.23 331.041 5
 0 1 15 1709.22 201.512 5
 0 -1 -15 1665.05 311.99 2
 0 1 15 1101.82 297.461 3
 0 1 16 599.391 218.02 3
 0 1 16 417.965 100.398 5
 0 -1 -16 572.653 206.55 2
 0 1 -16 320.49 91.1683 5
 0 -1 16 1129.09 344.106 3
 0 -1 17 1884.84 449.26 3
 0 1 -17 1623.38 301.616 5
 0 -1 -17 1771.24 334.139 2
 0 1 17 1800.77 401.19 3
 0 1 -18 5441.12 556.937 5
 0 -1 18 4684.66 734.166 3
 0 1 18 4633.48 657.562 3
 0 -1 -18 5324.6 620.495 2
 0 1 -19 7550.1 635.616 5
 0 -1 -19 7563.56 764.027 2
 0 1 19 6947.02 837.479 3
 0 -1 19 7636.07 956.753 3
 0 -1 20 25393.8 1786.86 3
 0 1 20 29703.8 1767.86 3
 0 1 -20 28233.3 1185.65 5
 0 -1 -20 28828.6 1530.17 2
 0 -1 20 27302.3 1672.64 4
 0 -1 21 63.8401 154.035 3
 0 -1 21 314.273 205.966 4
 0 1 21 140.797 101.671 3
 0 -1 -21 45.6992 84.6001 2
 0 -1 -22 5587.88 722.686 2
 0 1 22 4443.72 732.124 3
 0 -1 22 5545.12 883.508 3
 0 -1 22 5277.73 777.168 4
 0 -1 23 2009.9 550.257 3
 0 1 23 2172.27 533.06 3
 0 -1 -23 2358.23 477.067 2
 0 -1 23 1833.53 477.978 4
 0 -1 -24 456.065 222.591 2
 0 1 24 595.028 277.974 3
 0 -1 24 477.197 257.328 4
 0 -1 24 336.335 257.495 3
 0 -1 25 48.8737 105.685 4
 0 -1 -25 85.4008 73.8018 2
 0 1 -25 190.065 123.931 2
 0 1 25 40.8184 121.018 3
 0 -1 25 131.826 176.22 3
 0 1 26 1040.2 395.304 3
 0 -1 26 1262.48 411.625 4
 0 -1 26 457.687 267.228 3
 0 -1 27 727.013 339.32 4
 0 1 27 791.509 349.049 3
 0 -1 27 688.023 317.048 3
 0 -1 28 157.333 178.777 3
 0 1 28 178.176 125.102 3
 0 -1 28 77.2832 204.561 4
 0 1 29 153.577 125.736 3
 0 -1 29 61.3198 79.6017 4
 0 -1 29 31.8584 71.0958 3
 0 -1 30 15.606 144.735 4
 0 1 30 353.046 269.61 3
 0 -1 31 -237.664 221.689 4
 0 2 0 28160.6 1475.63 5
 0 -2 0 28480.2 1286.85 4
 0 -2 -1 4411.01 501.978 4
 0 2 -1 4524.67 605.432 5
 0 2 1 4618.96 595.237 5
 0 -2 1 4714.84 533.546 4
 0 2 -2 26.6823 50.6087 5
 0 -2 -2 497.752 174.524 4
 0 2 2 150.237 94.2222 5
 0 -2 2 105.434 84.3766 4
 0 -2 3 66014 2036.26 4
 0 2 -3 67783.7 2411.06 5
 0 -2 -3 69381.7 1924.04 4
 0 2 3 64934.2 2124.27 5
 0 -2 4 10444.5 825.386 4
 0 2 -4 11442.1 1001.1 5
 0 2 4 10964.8 853.582 5
 0 -2 5 2689.25 434.755 4
 0 2 -5 2292.49 453.396 5
 0 2 -6 18002.4 1290.49 5
 0 -2 6 18321.5 1140.44 4
 0 -2 7 18875.1 1183.32 4
 0 2 -7 17445.6 1299.78 5
 0 -2 8 31296.4 1564.74 4
 0 2 -8 31964.1 1769.59 5
 0 2 -9 45036.1 2124.6 5
 0 -2 9 42715.2 1854.8 4
 0 -2 10 20210.6 1303.06 4
 0 2 -10 20500.6 1460.91 5
 0 -2 11 271.103 132.412 4
 0 2 11 185.472 71.01 1
 0 2 -11 69.7256 66.2946 5
 0 2 12 4444.67 310.898 1
 0 -2 12 4092.93 628.366 4
 0 2 -12 4749.25 702.05 5
 0 -2 13 291.087 197.518 4
 0 2 -13 79.6386 123.139 5
 0 2 13 203.138 54.9703 1
 0 2 14 11544.5 910.947 3
 0 -2 14 10807.7 1044.41 4
 0 2 14 11325.6 340.911 1
 0 2 -14 12146.9 1128.48 5
 0 2 15 657.36 73.7049 1
 0 2 -15 831.21 332.508 5
 0 -2 15 783.579 289.994 4
 0 2 15 652.964 225.626 3
 0 2 -16 483.451 219.967 5
 0 -2 16 607.497 279.867 4
 0 2 16 466.155 206.049 3
 0 2 16 301.838 110.186 5
 0 2 16 520.46 65.5586 1
 0 2 17 3920.24 586.351 3
 0 -2 17 3744.37 658.216 4
 0 2 -17 3959.9 662.227 5
 0 2 -18 1276.78 381.875 5
 0 -2 18 1139.53 376.605 4
 0 2 18 1148.92 331.397 3
 0 -2 19 118.768 171.314 4
 0 2 -19 -68.7999 112.477 5
 0 2 19 84.9844 97.5851 3
 0 -2 20 4102.65 743.933 4
 0 2 -20 5417.51 758.244 5
 0 2 20 7055.81 862.787 3
 0 -2 21 3480.74 693.968 4
 0 2 21 3169.81 590.246 3
 0 2 -21 4025.42 637.393 5
 0 2 22 2129.4 510.271 3
 0 -2 22 1422.61 450.113 4
 0 -2 23 1913.84 530.828 4
 0 2 23 1552.18 437.361 3
 0 -2 24 6726.27 1030.68 4
 0 2 24 7942.96 1022.55 3
 0 -2 25 2839.14 689.803 4
 0 2 25 4014.87 755.167 3
 0 -2 26 1417.25 543.433 4
 0 2 26 1509.78 474.537 3
 0 2 27 79.4257 127.637 3
 0 -2 27 -21.6356 159.841 4
 0 -2 28 351.945 302.962 4
 0 2 28 290.373 217.641 3
 0 -2 29 624.168 317.527 4
 0 2 29 553.382 329.625 3
 0 2 30 216.051 177.068 3
 0 -3 0 47.1362 102.578 4
 0 3 0 50.1267 122.237 5
 0 3 -1 3014.11 601.177 5
 0 3 1 2861.43 570.631 5
 0 -3 1 2705.88 493.237 4
 0 -3 -1 2658.76 486.052 4
 0 -3 2 23642.3 1465.66 4
 0 3 -2 21533.6 1621.66 5
 0 3 2 21311.6 1539.12 5
 0 -3 -2 22762.1 1380.84 4
 0 3 3 1395.71 405.605 5
 0 -3 3 2056.17 481.208 4
 0 3 -3 1699.21 502.969 5
 0 -3 -3 2026.24 440.785 4
 0 3 4 7486.39 888.571 5
 0 -3 4 7360.68 846.894 4
 0 3 -4 8783.67 1050.08 5
 0 3 5 28418.8 1720.53 5
 0 -3 5 29891.6 1713.56 4
 0 3 -5 30916.7 1986.92 5
 0 3 -6 41005.8 2335.49 5
 0 -3 6 41895.4 2055.36 4
 0 3 6 39390.4 1997.67 5
 0 -3 7 1612.07 398.594 4
 0 3 7 1544.31 387.888 5
 0 3 -7 1080.16 387.68 5
 0 3 8 2624.52 493.225 5
 0 3 -8 3248.84 647.335 5
 0 -3 8 3692.12 639.706 4
 0 3 -9 1823.52 498.785 5
 0 3 9 1691.93 397.681 5
 0 -3 9 1639.34 454.416 4
 0 -3 10 126.138 124.629 4
 0 3 10 302.2 196.03 5
 0 3 -10 5.35911 154.299 5
 0 3 -11 532.985 233.179 5
 0 -3 11 938.825 338.204 4
 0 3 11 770.273 275.643 5
 0 -3 12 728.485 326.081 4
 0 3 12 575.33 236.95 5
 0 3 -12 361.631 229.543 5
 0 -3 13 6.15491 94.0524 4
 0 3 13 -18.8344 63.9777 5
 0 3 -13 19.9128 112.917 5
 0 3 14 1053.34 211.65 1
 0 3 -14 1330.09 448.74 5
 0 -3 14 695.098 312.56 4
 0 3 14 1069.86 298.518 5
 0 3 -15 1745.72 507.379 5
 0 -3 15 2404 570.302 4
 0 3 15 1688.59 368.309 5
 0 3 15 1793.25 251.366 1
 0 3 -16 2280.82 581.619 5
 0 -3 16 2415.23 581.215 4
 0 -3 17 489.211 209.285 4
 0 3 17 440.383 221.293 3
 0 3 -17 789.384 361.361 5
 0 -3 18 1234.05 450.642 4
 0 3 18 1189.08 337.214 3
 0 3 -18 1051.26 417.886 5
 0 3 19 8425.53 928.551 3
 0 -3 19 7219.4 1090.31 4
 0 3 -19 8343.89 1125.56 5
 0 3 20 1421.66 397.213 3
 0 -3 20 2105.81 597.395 4
 0 3 -20 1908.57 539.573 5
 0 -3 21 1371.03 476.406 4
 0 3 21 1067.38 344.158 3
 0 3 -21 1243.97 448.886 5
 0 3 -22 -24.9519 134.561 5
 0 3 22 21.0178 149.302 3
 0 -3 22 -46.8051 183.705 4
 0 -3 23 1238.08 489.703 4
 0 3 23 1618.01 465.22 3
 0 -3 24 1156.67 468.984 4
 0 3 24 858.25 363.486 3
 0 3 25 248.993 141.951 3
 0 -3 25 551.802 331.95 4
 0 3 26 320.428 219.466 3
 0 -3 26 83.5735 110.471 4
 0 -3 27 145.34 175.221 4
 0 3 27 -59.9682 115.287 3
 0 -3 28 9.53977 111.611 4
 0 3 28 5.34235 108.62 3
 0 3 29 251.569 209.256 3
 0 -4 0 2610.79 565.115 4
 0 4 0 2857.25 660.673 5
 0 -4 1 2559.22 555.956 4
 0 -4 -1 2683.91 570.958 4
 0 4 1 2555.4 623.353 5
 0 4 -1 2719.34 697.353 5
 0 -4 2 8741.33 1041.16 4
 0 4 2 6894.42 1021.27 5
 0 4 -2 8513.83 1179.63 5
 0 -4 -2 9582.53 1048.92 4
 0 -4 -3 3207.59 606.467 4
 0 4 3 3755.25 750.41 5
 0 4 -3 2690.91 705.89 5
 0 -4 3 4158.21 706.519 4
 0 -4 4 10654.2 1173 4
 0 -4 -4 13820 1264.97 4
 0 4 4 10875.7 1258.26 5
 0 4 -4 11805.3 1414.04 5
 0 4 5 3445.73 708.993 5
 0 4 -5 3903.22 813.003 5
 0 -4 5 3996.27 711.843 4
 0 4 -6 1701.88 553.478 5
 0 -4 6 1856.07 512.033 4
 0 4 6 1218.67 386.606 5
 0 4 -7 1807.44 572.093 5
 0 4 7 2101.64 532.235 5
 0 -4 7 2172.56 541.411 4
 0 -4 8 16701.2 1529.46 4
 0 4 8 15725.4 1451.94 5
 0 4 -8 16748.4 1723.85 5
 0 -4 9 1331.32 473.286 4
 0 4 -9 1099.57 478.855 5
 0 4 9 550.218 282.762 5
 0 -4 10 10819.3 1290.86 4
 0 4 10 11718.1 1233.57 5
 0 4 -10 14104.6 1602.59 5
 0 4 11 66.8036 153.509 5
 0 4 -11 -178.635 285.081 5
 0 -4 11 -80.5948 194.734 4
 0 4 12 1307.79 416.65 5
 0 -4 12 1846.88 534.195 4
 0 4 -12 2500.16 689.965 5
 0 4 -13 15.9772 124.366 5
 0 -4 13 -274.253 219.354 4
 0 4 13 -105.437 100.375 5
 0 -4 14 1220.22 485.766 4
 0 4 14 676.329 294.706 5
 0 4 -14 717.899 319.152 5
 0 4 -15 7817.69 1216 5
 0 -4 15 9288.64 1271.14 4
 0 4 -16 3535.74 799.672 5
 0 -4 16 4298.16 891.73 4
 0 4 -17 15746.7 1734.17 5
 0 -4 17 15940.7 1717.28 4
 0 -4 18 -7.80058 91.1843 4
 0 4 -18 94.3896 91.9468 5
 0 4 -19 1265.13 490.578 5
 0 -4 19 689.053 345.009 4
 0 4 19 1092.7 350.313 3
 0 4 20 91.9672 85.5603 3
 0 -4 20 222.122 215.314 4
 0 4 -20 220.119 223.12 5
 0 -4 21 -389.124 289.814 4
 0 4 21 110.335 72.6156 3
 0 4 -21 -189.963 196.327 5
 0 4 -22 91.0768 134.235 5
 0 4 22 -66.5658 63.2499 3
 0 -4 23 608.396 377.638 4
 0 4 23 1167.28 394.292 3
 0 4 -23 494.617 313.116 5
 0 4 24 32.4131 87.7144 3
 0 -4 24 919.676 463.426 4
 0 4 25 -65.8716 146.87 3
 0 -4 25 0.58432 105.22 4
 0 4 26 292.965 208.225 3
 0 -5 0 42.8358 74.5605 4
 0 5 0 64.9837 169.352 5
 0 -5 -1 1896.08 508.111 4
 0 5 1 1541.42 574.334 5
 0 5 -1 2592.28 734.019 5
 0 -5 1 2829.47 654.272 4
 0 -5 -2 0.68554 111.87 4
 0 5 -2 625.386 386.427 5
 0 -5 2 359.426 187.953 4
 0 5 2 338.911 261.241 5
 0 5 3 6873.2 1142.12 5
 0 5 -3 4753.85 1013.34 5
 0 -5 -3 6881.51 1003.47 4
 0 -5 3 5512.2 947.19 4
 0 5 -4 29846.9 2520.25 5
 0 -5 4 28424.7 2137.87 4
 0 5 4 30758.5 2402.95 5
 0 -5 5 1774.54 560.531 4
 0 5 -5 2149.83 750.428 5
 0 5 5 2265.06 652.86 5
 0 5 6 7303.22 1158.35 5
 0 5 -6 5147.76 1051.47 5
 0 -5 6 6792.64 1063.75 4
 0 -5 7 2129.94 592.148 4
 0 5 7 2288.55 640.166 5
 0 5 -7 1099.43 487.527 5
 0 5 -8 397.775 335.191 5
 0 -5 8 606.541 375.138 4
 0 5 8 351.472 252.698 5
 0 -5 9 3275.43 756.742 4
 0 5 9 2568.84 682.304 5
 0 5 -9 4227.78 972.607 5
 0 -5 10 2843.12 724.943 4
 0 5 10 3365.84 767.923 5
 0 5 -10 3497.64 883.511 5
 0 5 -11 397.943 354.804 5
 0 -5 11 450.392 235.307 4
 0 5 11 -20.8592 81.2934 5
 0 5 12 1536.07 495.732 5
 0 -5 12 2217.82 648.654 4
 0 5 -12 1717.25 629.68 5
 0 5 -13 331.133 298.199 5
 0 5 13 194.407 221.457 5
 0 -5 13 -151.723 187.225 4
 0 -5 14 417.357 317.923 4
 0 5 -14 -0.55256 137.299 5
 0 5 -15 399.038 347.671 5
 0 -5 15 49.1126 126.979 4
 0 -5 16 232.451 264.336 4
 0 5 -16 877.463 448.072 5
 0 5 -17 4436.3 1015.92 5
 0 -5 17 4462.95 987.219 4
 0 -5 18 99.6103 184.188 4
 0 5 -18 -144.679 192.147 5
 0 5 -19 572.691 335.822 5
 0 -5 19 1307.48 561.959 4
 0 5 -20 814.14 415.579 5
 0 -5 20 1735.03 646.557 4
 0 -5 21 507.746 346.702 4
 0 5 -21 774.439 437.699 5
 0 5 -22 385.702 346.549 5
 0 5 -23 188.112 231.439 5
 0 -6 0 7075.5 1118.32 4
 0 6 0 5978.76 1218.69 5
 0 -6 1 177.427 232.854 4
 0 6 -1 -341.956 410.929 5
 0 6 1 251.688 296.615 5
 0 -6 -1 231.7 139.066 4
 0 6 -2 24.1988 146.15 5
 0 -6 -2 8.47011 121.271 4
 0 -6 3 2817.34 727.513 4
 0 6 -3 3758.37 989.38 5
 0 6 3 3477.09 911.98 5
 0 -6 4 2912.03 760.477 4
 0 6 4 4227.05 979.353 5
 0 6 -4 3630.5 978.844 5
 0 -6 5 -16.7358 235.745 4
 0 6 -5 -121.722 220.462 5
 0 6 5 446.293 318.449 5
 0 -6 6 35.6914 83.7473 4
 0 6 -6 318.9 355.417 5
 0 6 6 -393.808 307.64 5
 0 6 -7 111.066 217.69 5
 0 6 7 230.438 253.116 5
 0 -6 7 66.0762 133.394 4
 0 6 -8 -87.5359 179.763 5
 0 6 8 330.948 274.487 5
 0 -6 8 373.044 285.124 4
 0 6 -9 946.648 539.207 5
 0 -6 9 548.414 392.38 4
 0 6 9 491.3 347.662 5
 0 6 10 316.966 279.462 5
 0 -6 10 451.208 278.695 4
 0 6 -10 101.432 221.4 5
 0 -6 11 24.1783 176.262 4
 0 6 11 -333.848 271.562 5
 0 6 -12 339.637 273.164 5
 0 6 12 -13.2689 83.0978 5
 0 -6 12 46.7718 75.1398 4
 0 -6 13 30.0984 247.595 4
 0 6 -13 99.4849 255.339 5
 0 -6 14 -5.3269 91.25 4
 0 6 -14 -153.619 215.031 5
 0 6 -15 236.288 345.984 5
 0 -6 15 -222.053 247.99 4
 0 -6 16 2004.92 704.759 4
 0 6 -16 987.423 544.836 5
 0 6 -17 111.745 168.305 5
 0 -6 17 623.947 402.364 4
 0 6 -18 -177.819 236.619 5
 0 6 -19 204.986 231.259 5
 0 -7 0 551.975 374.695 4
 0 7 0 13.4306 161.21 5
 0 7 1 248.303 274.103 5
 0 -7 1 1488.97 549.201 4
 0 -7 -1 321.086 254.239 4
 0 7 -1 654.709 470.141 5
 0 7 2 -324.716 312.902 5
 0 -7 2 -74.4766 137.403 4
 0 7 -2 236.841 266.756 5
 0 -7 3 -36.6279 93.1034 4
 0 7 3 -2.86108 258.459 5
 0 7 -4 93.3752 234.729 5
 0 7 4 -221.89 325.946 5
 0 -7 4 6.13504 124.467 4
 0 -7 5 480.039 365.244 4
 0 7 5 208.177 220.192 5
 0 7 -5 343.078 448.655 5
 0 7 6 -361.764 323.639 5
 0 -7 6 377.989 309.472 4
 0 7 -6 -20.0476 207.437 5
 0 7 -7 200.207 300.377 5
 0 7 7 67.429 118.242 5
 0 -7 7 -1.19111 80.8377 4
 0 7 8 437.732 455.45 5
 0 -7 8 -10.3326 194.62 4
 0 7 -8 69.5295 294.392 5
 0 -7 9 71.6311 156.535 4
 0 7 9 -273.873 280.533 5
 0 7 10 637.666 335.304 5
 -1 0 31 172.752 161.401 4
 -1 0 31 -194.207 220.166 3
 -1 0 30 3721.35 768.298 4
 -1 0 30 3633.21 874.995 3
 -1 0 29 -66.7139 94.714 3
 -1 0 29 226.721 205.613 4
 -1 0 28 229.864 159.259 4
 -1 0 28 504.385 336.347 3
 1 0 -28 536.389 249.068 2
 1 0 -27 140.108 119.825 2
 -1 0 27 68.2242 131.403 3
 1 0 -26 2492.57 480.877 2
 -1 0 26 2604.2 649.921 3
 1 0 -25 184.334 143.557 2
 -1 0 25 287.818 224.787 3
 -1 0 24 18270.6 1619.46 3
 1 0 -24 19371.1 1222.76 2
 1 0 -23 125.146 152.991 2
 -1 0 23 353.52 278.147 3
 1 0 -22 57084.7 1894.6 2
 -1 0 22 52940.9 2610.62 3
 -1 0 21 -6.62873 119.872 3
 1 0 -21 360.598 179.085 2
 1 0 -20 1273.05 263.394 2
 -1 0 20 1497.92 413.745 3
 1 0 -19 18.718 82.1883 2
 -1 0 19 5.06379 71.0825 3
 -1 0 18 459.981 231.051 3
 1 0 -18 266.352 116.881 2
 -1 0 17 70.9674 163.362 3
 1 0 -17 130.478 98.833 2
 -1 0 16 1.81951 89.5782 3
 1 0 -16 174.824 52.2861 1
 -1 0 15 -23.1967 95.1178 3
 1 0 -15 56.1058 39.4442 1
 -1 0 14 656.913 233.953 3
 1 0 -14 841.774 110.103 1
 -1 0 13 30.8447 82.9981 3
 -1 0 13 -8.35608 50.7208 5
 1 0 -13 38.6791 33.728 1
 1 0 -12 1049.69 121.452 1
 -1 0 12 1089.8 233.974 5
 -1 0 12 889.209 234.555 3
 1 0 -11 202.217 83.832 5
 -1 0 11 -150.622 84.1978 5
 -1 0 11 60.4868 104.273 3
 1 0 -11 15.5893 27.3466 1
 1 0 -10 70687.3 1163.34 5
 1 0 -10 70861.1 961.26 1
 -1 0 10 71782.5 1888.08 3
 -1 0 10 71640.6 1735.55 5
 -1 0 9 38.4545 48.0986 3
 1 0 -9 21.4319 44.6838 5
 -1 0 9 21.8459 40.3952 5
 1 0 -9 26.2823 35.5547 1
 1 0 -8 17810 472.489 1
 1 0 -8 18170.7 567.73 5
 -1 0 8 18158 765.63 5
 -1 0 8 18468.8 848.634 3
 1 0 -7 56.1163 38.623 1
 -1 0 7 -138.154 63.0997 5
 1 0 -7 -19.7859 41.2237 3
 -1 0 7 94.209 82.1343 3
 1 0 -7 57.4481 44.4473 5
 1 0 -6 35017.9 734.369 5
 1 0 -6 35231.3 627.871 1
 1 0 -6 36050.9 994.839 3
 -1 0 6 35513.4 799.888 1
 -1 0 6 36010.9 916.988 5
 -1 0 6 37534.7 1043.34 3
 1 0 -5 12.2351 14.5281 3
 1 0 -5 47.0623 54.1227 5
 -1 0 5 113.952 68.3051 5
 1 0 -5 50.3893 34.2678 1
 -1 0 5 -83.7735 69.3927 1
 -1 0 5 -29.7917 45.9178 3
 -1 0 4 123093 1397.54 5
 -1 0 4 127262 1210 1
 -1 0 4 127399 1609.23 3
 1 0 -4 124827 1056.22 1
 1 0 -4 129767 1243.24 5
 1 0 -4 123332 1558.7 3
 -1 0 3 -2.24085 19.2579 1
 -1 0 3 39.824 27.6178 5
 1 0 3 18.1227 20.9385 1
 -1 0 -4 336169 1498.63 1
 -1 0 -5 -5.55831 16.3264 1
 1 0 5 -10.7611 36.2809 3
 -1 0 -6 401667 1818.93 1
 -1 0 -6 400746 2630.55 5
 1 0 6 402697 3648.66 3
 -1 0 -7 -9.22259 23.0282 5
 1 0 7 7.55838 41.4156 3
 -1 0 -7 -20.2866 25.0287 1
 -1 0 -8 760.635 120.103 5
 1 0 8 905.396 202.594 3
 -1 0 -8 685.642 81.5722 1
 1 0 9 -39.6386 85.2326 3
 -1 0 -9 -7.56113 21.072 5
 1 0 10 6083.74 569.983 3
 -1 0 -10 5171.69 299.116 5
 -1 0 -11 -18.6787 29.1857 5
 1 0 11 -22.894 79.856 3
 1 0 12 638.24 188.891 3
 -1 0 -12 590.473 78.3553 1
 -1 0 -12 829.076 132.501 2
 -1 0 -12 642.97 97.8426 5
 -1 0 -13 -6.17297 16.3033 1
 -1 0 -13 10.5124 45.0875 2
 -1 0 -13 2.6318 9.62958 5
 1 0 13 -11.6746 96.2131 3
 -1 0 -14 75.4281 54.7429 2
 1 0 14 8.28575 54.6903 3
 -1 0 -14 102.845 39.4409 5
 1 0 15 46.7258 88.1721 3
 -1 0 -15 31.8327 47.3352 2
 -1 0 -15 28.7553 26.0736 5
 -1 0 -16 11667.2 606.971 2
 1 0 16 10697 972.603 3
 1 0 17 33.0915 127.426 3
 -1 0 -17 113.814 93.9571 2
 -1 0 -18 33646.5 1160.25 2
 1 0 18 35092.7 1882.09 3
 1 0 19 251.459 208.629 3
 -1 0 -19 89.101 88.5234 2
 1 0 20 5933.23 823.217 3
 -1 0 -20 5348.22 516.192 2
 -1 0 -21 54.3276 78.7624 2
 1 0 21 128.714 63.68 3
 1 0 22 -11.9584 114.819 3
 -1 0 -22 110.126 91.624 2
 1 0 23 115.093 164.115 3
 -1 0 -23 56.6982 109.446 2
 1 0 24 245.594 209.199 3
 1 0 25 -107.372 173.02 3
 1 0 26 248.909 191.317 3
 1 0 27 -37.3208 173.541 3
 1 0 28 42.3882 85.4208 3
 1 0 29 -169.081 192.746 3
 -1 -1 32 200.842 215.546 4
 -1 -1 31 248.805 265.662 4
 -1 1 31 310.993 260.639 3
 -1 -1 30 327.425 256.589 4
 -1 1 30 704.495 363.071 3
 -1 1 29 776.776 368.304 3
 -1 -1 29 1356.85 480.804 4
 1 1 -28 248.59 153.509 2
 -1 -1 28 294.35 256.167 4
 -1 1 28 246.319 227.117 3
 1 -1 -27 1368.47 421.374 2
 -1 -1 27 2141.29 576.594 4
 1 1 -27 1931.59 369.397 2
 -1 1 27 2337.72 619.008 3
 -1 1 26 -144.305 72.4418 3
 1 -1 -26 80.473 131.755 2
 1 1 -26 300.589 157.608 2
 -1 -1 26 153.801 189.993 4
 1 -1 -25 -29.1721 51.5652 2
 -1 -1 25 124.3 134.797 4
 -1 1 25 220.122 208.08 3
 1 -1 -24 10089.1 1053.86 2
 -1 -1 24 11079.9 1194.41 4
 -1 1 24 9337.67 1112.76 3
 -1 -1 23 4987.7 869.024 3
 1 -1 -23 5968.39 785.931 2
 -1 -1 23 5697.16 833.6 4
 -1 1 23 5366.8 806.479 3
 -1 1 22 495.042 221.511 3
 -1 -1 22 824.166 324.079 4
 -1 -1 22 385.503 270.289 3
 1 -1 -22 478.567 223.167 2
 -1 1 21 3746.7 643.347 3
 1 -1 -21 3363.58 559.554 2
 -1 -1 21 3107.36 591.187 4
 -1 -1 21 3963.48 733.074 3
 1 1 -21 3450.31 410.902 5
 -1 1 20 7131.52 855.371 3
 1 1 -20 6351.25 567.823 5
 -1 -1 20 5755.24 843.657 3
 1 -1 -20 6796.21 762.459 2
 -1 -1 20 6444.88 815.219 4
 -1 -1 19 1881.01 473.685 3
 -1 -1 19 1803.34 423.141 4
 1 -1 -19 1625.32 368.176 2
 -1 1 19 1605.49 395.187 3
 1 1 -19 2015.02 332.937 5
 1 -1 -18 3205.35 488.147 2
 1 1 -18 3379.02 429.449 5
 -1 -1 18 2815.06 510.772 4
 -1 -1 18 2948.08 574.196 3
 -1 1 18 3583.82 565.6 3
 -1 -1 17 6367.11 737.995 4
 -1 1 17 6589.83 727.648 3
 1 -1 -17 6450.28 671.091 2
 -1 -1 17 6199.02 834.495 3
 1 1 -17 5839.2 566.051 5
 1 1 -16 6556.35 598.509 5
 -1 -1 16 6564.76 726.745 4
 -1 1 16 6493.71 698.87 3
 1 -1 -16 6565.79 647.667 2
 -1 -1 16 6560.09 807.024 3
 1 1 -15 536.693 185.279 5
 1 -1 -15 495.381 181.383 2
 -1 -1 15 400.076 195.459 4
 -1 -1 15 598.039 233.099 3
 -1 1 15 470.251 186.332 3
 -1 1 15 713.852 162.131 5
 1 -1 -14 2907.92 411.399 2
 -1 1 14 2206.88 214.525 1
 -1 -1 14 2235.29 407.131 4
 -1 -1 14 2823.51 509.643 3
 -1 1 14 2572.27 280.743 5
 -1 1 14 2321.5 377.027 3
 1 1 -14 2486.23 380.253 5
 1 -1 -13 366.168 168.382 2
 -1 1 13 156.716 52.9698 1
 1 1 -13 146.336 82.921 5
 -1 1 13 195.945 98.0721 3
 -1 -1 13 149.367 102.042 4
 -1 -1 13 362.016 197.911 3
 -1 1 13 306.02 95.6754 5
 -1 1 12 8167.72 346.015 1
 1 1 -12 9134.18 723.853 5
 1 -1 -12 8852.84 663.644 2
 -1 1 12 8182.68 426.821 5
 -1 -1 12 8510.98 734.972 4
 -1 1 12 8230.7 655.823 3
 1 -1 -11 12244.5 758.194 2
 -1 1 11 11962 749.147 3
 1 1 -11 12329.6 837.577 5
 -1 1 11 12124 380.78 1
 -1 -1 11 11849.3 828.077 4
 1 1 -10 4192.52 485.184 5
 -1 -1 10 4188.07 479.168 4
 -1 1 10 4015.06 212.085 1
 1 -1 -10 3504.33 402.538 2
 -1 1 10 4047 410.555 3
 1 -1 -9 15903.8 818.626 2
 -1 1 9 16661.7 778.738 3
 -1 1 9 16028.1 413.582 1
 1 1 -9 16805.6 952.111 5
 -1 -1 9 15769.9 906.001 4
 -1 -1 8 3743.13 433.535 4
 -1 1 8 4496.8 228.148 1
 1 1 -8 3896.58 451.644 5
 1 -1 -8 4163.19 409.029 2
 -1 1 8 4677.61 382.536 3
 1 1 -7 5316.51 527.939 5
 1 -1 -7 5553.42 461.554 2
 -1 1 7 5755.09 394.549 3
 -1 1 7 5231.02 274.305 1
 -1 -1 7 5936.04 521.357 4
 -1 1 6 1142.46 158.413 3
 -1 -1 6 1108.41 227.922 4
 -1 -1 6 1229.25 268.298 5
 -1 1 6 978.918 133.339 1
 1 -1 -6 1250.13 214.778 2
 1 1 -6 1077.48 247.017 5
 -1 -1 5 94387.8 1977.02 4
 1 1 -5 94065.2 1899.59 4
 1 -1 -5 92424.7 1830.74 2
 1 1 -5 93578.9 2109.01 5
 -1 -1 5 91542.5 2266.93 5
 -1 1 5 93664.2 1368.75 1
 1 1 -4 16555 798.935 4
 1 1 -4 16122.2 859.177 5
 -1 1 4 16016.8 599.92 1
 -1 -1 4 16427.6 928.74 5
 -1 1 4 15775.6 682.294 2
 1 -1 -4 16201.8 748.745 2
 -1 -1 4 15403.2 778.7 4
 1 1 -3 342111 3862.1 5
 1 1 -3 340688 3626.05 4
 -1 1 3 348051 3216.39 2
 -1 -1 3 342782 4096.94 5
 -1 -1 3 341778 3616.56 4
 -1 1 3 343178 2813.67 4
 1 -1 -3 340300 3357.83 2
 -1 -1 2 557873 4480.78 4
 1 1 -2 537637 4505.37 4
 -1 1 2 536412 3477.92 4
 1 -1 -2 558164 3463.08 4
 -1 -1 2 559254 5054.59 5
 -1 1 2 552421 4125.64 2
 1 1 -2 562330 4836.98 5
 -1 -1 1 52713 1335.41 4
 -1 1 1 51923.3 1112.55 4
 1 1 -1 50900.6 1406.86 5
 1 -1 -1 52846.6 1109.32 4
 -1 -1 1 50802.3 1473.93 5
 1 1 -1 50338.8 1363.89 4
 -1 -1 0 62412.3 1420.56 4
 1 1 0 59449 1460.68 4
 -1 -1 0 59301.2 1544.33 5
 1 1 0 61408.5 1495.83 5
 1 -1 0 62975.7 1251.98 4
 -1 1 0 60935.6 1214.41 4
 -1 1 -1 44178 885.237 3
 -1 1 -1 44289.5 1041.15 4
 1 1 1 44979.3 1258.58 4
 -1 -1 -1 42066.1 1271.23 5
 1 -1 1 44600.9 1094.08 4
 1 1 1 44337.2 1229.29 5
 1 -1 2 13776.1 631.182 4
 -1 1 -2 14138.6 550.782 3
 -1 1 -2 14000.4 594.109 4
 -1 -1 -2 13477.8 695.391 5
 1 -1 2 14445 575.407 3
 1 1 2 14751.7 678.3 5
 -1 1 -3 299261 2782.76 3
 -1 -1 -3 298286 3190.17 5
 1 1 3 296920 2929.34 5
 1 -1 3 302523 2867.69 3
 1 -1 3 307936 3078 4
 1 -1 4 151133 2205.99 3
 -1 -1 -4 150057 2154.68 5
 1 1 4 149801 1912.06 5
 -1 1 -4 150624 2104.76 3
 1 -1 4 151567 2254.67 4
 1 1 5 252877 2317.12 5
 -1 1 -5 253227 2921.25 3
 1 -1 5 256338 3040.89 4
 -1 -1 -5 252402 2616.23 5
 1 -1 5 253188 3061.74 3
 -1 1 -6 84768.4 2205.58 5
 1 -1 6 86695.3 1885.84 3
 1 1 6 85888.3 1551.28 2
 1 1 6 86320.2 1196.79 5
 -1 1 -7 57636.9 1861.77 5
 1 -1 7 58994.6 1650.08 3
 1 1 7 57934.8 1236.2 2
 -1 1 -8 75.036 64.345 5
 1 1 8 -19.7922 23.8792 2
 1 -1 8 116.212 115.547 3
 1 -1 9 18048.1 1013 3
 -1 1 -9 16867.6 1040.94 5
 1 1 9 16192.1 573.179 2
 -1 -1 -10 18803.5 896.915 2
 1 -1 10 19564.8 1109.92 3
 -1 1 -10 19626.5 1130.97 5
 -1 -1 -11 46226.2 1464.69 2
 -1 1 -11 47776.2 1802.73 5
 1 1 11 50606.2 1750.5 3
 1 -1 11 49411.3 1832.19 3
 1 -1 12 3077.38 490.352 3
 1 1 12 3593.37 487.106 3
 -1 -1 -12 2521.05 344.868 2
 -1 1 -12 2460.51 412.755 5
 -1 1 -13 687.112 226.164 5
 -1 -1 -13 660.318 174.515 2
 1 1 13 1053.05 283.515 3
 1 -1 13 969.159 289.469 3
 1 1 14 2524.3 445.404 3
 -1 -1 -14 2436.01 361.875 2
 -1 1 -14 2836.2 435.427 5
 1 -1 14 2289.72 449.939 3
 1 1 15 601.698 226.335 3
 1 -1 15 482.464 221.262 3
 -1 1 -15 445.973 164.797 5
 -1 -1 -15 393.855 158.102 2
 1 1 16 577.634 197.824 3
 -1 1 -16 568.129 194.266 5
 1 -1 16 788.065 285.139 3
 -1 -1 -16 366.208 149.705 2
 -1 -1 -17 35.5847 72.0895 2
 -1 1 -17 -256.979 130.54 5
 1 1 17 11.5228 64.3688 3
 1 -1 17 -50.6581 105.621 3
 -1 1 -18 10365.2 795.218 5
 1 -1 18 9091.43 1009.92 3
 1 1 18 9870.63 1000.13 3
 -1 -1 -18 8428.61 768.778 2
 1 1 19 55496.3 2422.05 3
 -1 -1 -19 56444.1 2053.53 2
 -1 1 -19 57147.4 1807.1 5
 1 -1 19 54507.2 2560.29 3
 1 1 20 1243.43 398.308 3
 1 -1 20 1399.18 455.186 3
 -1 -1 -20 1747.18 408.782 2
 1 -1 21 9787.57 1155.74 3
 1 1 21 10084.4 1093.31 3
 -1 -1 -21 10656.5 952.865 2
 1 1 22 2067.05 509.306 3
 1 -1 22 2325.08 564.391 3
 -1 -1 -22 2226.79 466.043 2
 1 -1 23 2205.74 583.301 3
 1 1 23 3331.22 660.083 3
 1 -1 24 208.107 200.32 3
 1 1 24 118.371 182.882 3
 1 1 25 154.116 145.903 3
 1 -1 25 136.742 159.381 4
 1 -1 25 -88.4629 194.592 3
 1 1 26 109.908 174.863 3
 1 -1 26 209.365 205.775 4
 1 -1 27 798.019 412.687 3
 1 1 27 136.5 147.753 3
 1 -1 27 651.712 325.54 4
 1 1 28 400.365 256.908 3
 1 -1 28 300.446 221.403 4
 1 -1 28 283.06 264.221 3
 1 -1 29 1470.09 549.05 3
 1 -1 29 934.503 422.687 4
 1 1 29 855.345 410.27 3
 1 1 30 -9.20212 139.635 3
 1 -1 30 205.243 192.744 4
 -1 2 31 -223.075 219.822 3
 -1 2 30 2245.47 633.68 3
 -1 -2 30 2127.64 674.823 4
 -1 2 29 -8.07931 97.5163 3
 -1 -2 29 219.079 227.844 4
 -1 2 28 1689.28 506.898 3
 -1 -2 28 1180.77 464.645 4
 -1 -2 27 214.55 265.99 4
 1 -2 -27 14.9023 158.582 2
 -1 2 27 245.16 194.933 3
 -1 -2 26 -66.5925 120.017 4
 1 -2 -26 195.354 141.054 2
 -1 2 26 272.912 187.162 3
 1 -2 -25 23.1666 109.834 2
 -1 -2 25 164.739 213.004 4
 -1 -2 24 95.6003 140.721 4
 1 -2 -24 91.5273 62.0874 2
 -1 2 24 -259.734 187.109 3
 -1 -2 23 292.449 221.098 4
 -1 2 23 71.3189 110.101 3
 1 -2 -23 -179.387 204.749 2
 -1 -2 22 279.026 254.998 4
 1 2 -22 349.021 188.488 5
 1 -2 -22 146.656 106.632 2
 -1 2 22 284.218 216.166 3
 -1 -2 21 2881.59 625.937 4
 -1 2 21 3260.68 583.523 3
 1 2 -21 3114.11 551.651 5
 1 -2 -21 3066.69 618.692 2
 -1 -2 20 868.663 323.221 4
 1 2 -20 1174.31 338.391 5
 -1 2 20 1398.7 369.503 3
 1 -2 -20 713.822 296.414 2
 -1 2 19 130.331 99.6868 3
 1 2 -19 -39.9906 105.005 5
 -1 -2 19 112.774 217.164 4
 1 -2 -19 502.606 216.734 2
 -1 2 18 7344.39 792.721 3
 1 -2 -18 6847.91 854.423 2
 -1 -2 18 6627.56 907.445 4
 1 2 -18 7391.15 864.903 5
 -1 2 17 512.223 98.7962 1
 1 2 -17 184.071 99.7141 5
 1 -2 -17 57.7694 149.381 2
 -1 -2 17 660.273 322.637 4
 -1 2 17 426.256 206.694 3
 -1 2 16 1039.04 282.144 3
 -1 -2 16 1131.87 349.419 4
 1 -2 -16 1120.29 342.432 2
 1 2 -16 679.54 261.624 5
 -1 2 16 873.516 117.14 1
 1 2 -15 45599 2179.3 5
 1 -2 -15 49208.3 2138.31 2
 -1 2 15 46377.9 839.15 1
 -1 -2 15 45840.8 2221.08 4
 -1 2 15 48253.9 1816.13 3
 -1 2 14 9186.52 764.996 3
 -1 2 14 8808.05 374.084 1
 -1 -2 14 8191.92 923.009 4
 1 -2 -14 8648.52 880.681 2
 1 2 -14 8808.35 950.398 5
 -1 -2 13 718.381 271.75 4
 -1 2 13 905.06 237.126 3
 1 2 -13 525.214 242.332 5
 1 -2 -13 837.264 262.763 2
 -1 2 13 913.604 126.952 1
 -1 2 12 3742.29 443.638 3
 1 2 -12 3983.04 631.762 5
 -1 2 12 3360.81 272.049 1
 1 -2 -12 3210.82 501.834 2
 -1 -2 12 3556.99 577.59 4
 -1 2 11 15408.3 651.287 1
 -1 2 11 15677.2 881.681 3
 1 2 -11 16908.4 1290.84 5
 -1 -2 11 16671.1 1215.48 4
 -1 -2 10 35787.2 1743.67 4
 -1 2 10 33855.3 1048.7 1
 1 2 -10 37896.8 1931.54 5
 -1 2 9 30325.9 1040.24 1
 -1 -2 9 31976 1612.82 4
 1 2 -9 29977.4 1691.32 5
 1 2 -8 932.287 299.756 5
 -1 -2 8 1401.15 339.637 4
 -1 -2 7 29585.6 1491.15 4
 1 2 -7 32128.5 1728.7 5
 -1 -2 6 13836.8 1008.22 4
 1 2 -6 14514.2 1136.43 5
 1 2 -5 183.104 121.853 5
 -1 -2 5 -32.1131 78.156 4
 -1 -2 4 1946.64 365.586 4
 1 2 -4 1290.17 316.177 5
 1 -2 -4 1904.13 300.061 4
 -1 -2 3 14918.7 994.781 4
 1 -2 -3 14472.8 834.112 4
 1 2 -3 15235.2 1133.84 5
 1 2 -2 10958.8 942.215 5
 -1 -2 2 11468.5 868.273 4
 1 -2 -2 11289.5 750.488 4
 -1 -2 1 5178.92 575.466 4
 1 -2 -1 5714.04 544.5 4
 1 2 -1 4826.45 619.7 5
 1 -2 0 94780.4 2262.54 4
 1 2 0 96761.3 2712.95 5
 -1 -2 0 94314.7 2415.87 4
 -1 -2 -1 49060.1 1715.11 4
 1 -2 1 50088.8 1669.57 4
 1 2 1 52825.3 1964.22 5
 1 -2 2 10865.9 789.983 4
 1 2 2 11130.7 889.432 5
 -1 -2 -2 12257.5 852.283 4
 1 2 3 60237 2013.72 5
 1 -2 3 59570.8 1904.46 4
 -1 2 -4 11549.8 1040.21 5
 1 -2 4 11148.5 844.746 4
 1 2 4 11105.6 847.842 5
 1 2 5 6181.82 622.683 5
 -1 2 -5 5121.28 697.457 5
 1 -2 5 5958.15 637.804 4
 1 -2 6 8645.54 783.893 4
 -1 2 -6 8788.15 926.797 5
 1 2 6 8619.32 709.416 5
 -1 2 -7 25902.9 1612.71 5
 1 -2 7 28258.3 1428.9 4
 1 2 7 26097.9 1204.03 5
 -1 2 -8 9187.88 960.083 5
 1 2 8 9287.17 700.716 5
 1 -2 8 10176.2 887.073 4
 1 -2 9 37756.3 1730.73 4
 1 2 9 38207.8 1364.44 5
 -1 2 -9 34717.3 1904.25 5
 1 2 10 6553.38 546.764 5
 -1 2 -10 5605.35 781.793 5
 1 -2 10 6421.67 733.652 4
 -1 2 -11 758.375 276.932 5
 1 2 11 1019.29 201.829 5
 1 -2 11 1197.65 331.887 4
 1 -2 12 6819 793.34 3
 -1 2 -12 6709.67 849.551 5
 1 -2 12 6343.88 758.212 4
 1 2 12 6251.05 461.006 5
 1 -2 13 12252.1 1096.71 3
 -1 2 -13 13121.8 1193.94 5
 1 2 13 12405.4 425.297 1
 1 2 13 13217.3 594.956 5
 1 -2 13 12318 1081.63 4
 1 -2 14 17523.6 1360.43 3
 -1 2 -14 20754.1 1517.12 5
 1 2 14 18224.7 541.039 5
 1 -2 14 17809.6 1328.1 4
 1 2 14 17410.5 312.854 1
 -1 2 -15 -97.0249 136.65 5
 1 -2 15 -33.6181 117.7 4
 1 2 15 -25.1706 92.836 3
 1 -2 15 63.5019 81.5403 3
 -1 2 -16 1349.9 401.486 5
 1 -2 16 1725.21 459.119 3
 1 -2 16 1535.02 421.262 4
 1 2 16 1637.83 389.252 3
 1 -2 17 8219.96 1003.93 3
 1 2 17 8636.54 907.729 3
 1 -2 17 9236.36 1028.35 4
 -1 2 -17 9221.49 1031.64 5
 1 -2 18 1750.6 466.746 3
 -1 2 -18 1938.87 470.049 5
 1 -2 18 1953.45 479.861 4
 1 2 18 2127.52 450.736 3
 1 -2 19 392.758 278.925 3
 1 2 19 332.884 229.014 3
 1 -2 19 436.326 245.629 4
 -1 2 -19 509.914 240.756 5
 1 -2 20 4436.17 759.581 4
 1 2 20 4985.03 744.313 3
 1 -2 20 4317.59 778.89 3
 -1 2 -20 5411.23 772.863 5
 1 2 21 1649.91 438.611 3
 1 -2 21 1395.81 464.73 3
 1 -2 21 1428.51 427.716 4
 1 2 22 213.185 218.812 3
 1 -2 22 70.055 134.047 4
 1 -2 22 214.184 160.472 3
 1 -2 23 136.125 217.652 4
 1 2 23 -105.378 63.0546 3
 1 -2 23 -9.03195 106.134 3
 1 -2 24 4232.01 819.9 4
 1 2 24 5044.89 839.072 3
 1 -2 24 4134.79 846.067 3
 1 -2 25 219.016 199.404 4
 1 2 25 289.66 211.826 3
 1 -2 26 396.225 256.424 4
 1 2 26 432.596 277.27 3
 1 2 27 600.589 326.062 3
 1 -2 27 212.963 193.463 4
 1 2 28 267.954 246.357 3
 1 -2 28 -5.74718 151.459 4
 1 -2 29 18.2021 109.813 4
 1 2 29 294.23 179.141 3
 -1 -3 28 1441.05 573.014 4
 -1 -3 27 1832.49 628.365 4
 -1 3 27 1628.5 500.103 3
 -1 -3 26 148.346 174.957 4
 -1 3 26 433.026 260.231 3
 -1 3 25 135.094 95.4335 3
 -1 -3 25 -27.0162 150.662 4
 -1 3 24 82.2387 164.534 3
 -1 -3 24 456.604 318.296 4
 -1 3 23 117.119 140.99 3
 1 3 -23 260.126 212.354 5
 -1 -3 23 -20.8388 216.108 4
 1 3 -22 681.747 322.701 5
 -1 3 22 343.176 186.393 3
 -1 -3 22 338.542 237.085 4
 1 3 -21 1597.58 462.133 5
 -1 3 21 2275.55 512.766 3
 -1 -3 21 2369.55 638.408 4
 1 3 -20 3636.63 706.542 5
 -1 -3 20 2877.27 691.212 4
 -1 3 20 3059.4 567.841 3
 -1 -3 19 7359.14 1082.74 4
 1 3 -19 6258.81 952.002 5
 -1 3 19 7002.35 813.015 3
 1 3 -18 -264.395 202.661 5
 -1 3 18 168.464 146.781 3
 -1 -3 18 138.364 200.87 4
 1 3 -17 743.566 346.573 5
 -1 3 17 1025.61 294.047 3
 -1 -3 17 506.899 277.567 4
 1 3 -16 2538.45 607.176 5
 -1 3 16 2374.58 257.009 1
 -1 -3 16 1742.05 503.983 4
 -1 3 16 2586.18 448.312 3
 -1 3 15 585.308 149.23 1
 -1 3 15 542.295 206.657 3
 1 3 -15 754.386 350.4 5
 -1 -3 15 567.008 283.986 4
 1 3 -14 82.1436 86.8118 5
 -1 3 14 56.9768 69.0174 1
 -1 -3 14 162.693 124.641 4
 -1 3 13 90.0834 75.2223 1
 1 3 -13 250.887 188.032 5
 -1 -3 13 10.9691 124.621 4
 -1 -3 12 3180.04 628.126 4
 1 3 -12 3098.43 665.565 5
 -1 3 12 2964.37 388.363 1
 1 3 -11 2076.81 523.247 5
 -1 -3 11 2318.91 532.982 4
 -1 -3 10 14735.5 1302.4 4
 1 3 -10 12278.7 1316.49 5
 -1 -3 9 3842.66 646.096 4
 1 3 -9 3475.43 673.626 5
 -1 -3 8 3837.83 647.957 4
 1 3 -8 4076.94 757.838 5
 1 3 -7 2893.26 634.573 5
 -1 -3 7 3334.17 589.627 4
 1 3 -6 75620.5 3125.05 5
 -1 -3 6 77038.3 2804.6 4
 -1 -3 5 7.62158 120.234 4
 1 3 -5 8.45406 151.41 5
 1 -3 -4 9524.62 851.237 4
 -1 -3 4 9511.32 976.548 4
 1 3 -4 8582.4 1045.59 5
 1 3 -3 27760.9 1836.25 5
 1 -3 -3 29834.6 1537.1 4
 -1 -3 3 30060.7 1713.42 4
 1 3 -2 14051.2 1292.53 5
 1 -3 -2 14319.6 1071.59 4
 -1 -3 2 14847.5 1181.14 4
 1 3 -1 1555.56 436.476 5
 1 -3 -1 1819.31 398.768 4
 -1 -3 1 1613.59 375.632 4
 1 3 0 354.97 170.673 5
 1 -3 0 562.482 188.725 4
 -1 -3 0 1033.39 310.905 4
 -1 3 0 455.555 257.641 5
 1 3 1 7798.29 918.006 5
 -1 -3 -1 7474.46 818.651 4
 1 -3 1 7522.07 804.626 4
 -1 3 -1 7372.69 1026.28 5
 1 3 2 698.216 257.357 5
 -1 -3 -2 952.369 287.674 4
 1 -3 2 1112.48 298.884 4
 -1 3 -2 799.595 319.051 5
 1 3 3 42.7214 136.793 5
 1 -3 3 -32.9922 76.6296 4
 -1 3 -3 275.708 285.76 5
 -1 3 -4 119715 4050.7 5
 1 -3 4 114399 3302.34 4
 1 3 4 113663 3377.56 5
 1 -3 5 430.091 230.651 4
 -1 3 -5 281.452 236.674 5
 1 3 5 405.352 216.559 5
 -1 3 -6 2571.36 597.109 5
 1 3 6 2031.6 441.329 5
 1 -3 6 2101.79 492.523 4
 -1 3 -7 46585.9 2566.89 5
 1 3 7 43164.9 2005.3 5
 1 -3 7 49564.4 2270.41 4
 1 -3 8 8875.96 982.047 4
 1 3 8 7734.79 836.031 5
 -1 3 -8 7977.69 1063.34 5
 1 -3 9 13311.5 1229.88 4
 1 3 9 13521.9 1086.77 5
 -1 3 -9 12865.8 1365.24 5
 1 -3 10 221.037 188.844 4
 -1 3 -10 121.423 160.883 5
 1 3 10 194.205 132.584 5
 -1 3 -11 3397.16 703.63 5
 1 3 11 3517.36 529.48 5
 1 -3 11 3147.52 632.109 4
 1 3 12 2852.62 470.054 5
 -1 3 -12 2595.38 620.266 5
 1 -3 12 3904.69 708.9 4
 1 3 13 10032.8 855.364 5
 1 -3 13 10869.2 1189.66 4
 -1 3 -13 9237.66 1164.48 5
 1 -3 14 167.241 159.917 4
 -1 3 -14 370.011 242.099 5
 1 3 14 337.693 144.177 5
 1 -3 15 226.954 164.753 4
 -1 3 -15 532.885 307.125 5
 -1 3 -16 217.554 198.967 5
 1 -3 16 -18.0863 172.81 4
 1 -3 17 75.8003 199.967 4
 -1 3 -17 476.462 285.226 5
 1 3 18 1500.85 405.637 3
 -1 3 -18 1661.6 498.134 5
 1 -3 18 1383.01 476.036 4
 -1 3 -19 -27.1789 151.466 5
 1 3 19 -49.1235 125.162 3
 1 -3 19 -87.07 136.532 4
 1 3 20 1003.32 349.82 3
 1 -3 20 738.874 341.642 4
 -1 3 -20 737.884 354.48 5
 1 3 21 956.225 351.553 3
 1 -3 21 291.908 187.684 4
 -1 3 -21 612.593 293.734 5
 1 -3 22 141.949 201.576 4
 1 3 22 138.04 136.654 3
 1 -3 23 360.311 255.001 4
 1 3 23 325.358 221.954 3
 1 -3 24 -27.8001 165.282 4
 1 3 24 528.367 287.019 3
 1 3 25 58.0092 133.855 3
 1 -3 25 589.564 345.42 4
 1 3 26 2429.02 626.402 3
 1 -3 26 3264.79 819.938 4
 1 3 27 2520.32 646.733 3
 1 -3 27 1570.45 588.997 4
 1 3 28 276.85 260.577 3
 -1 -4 26 -124.265 192.009 4
 -1 -4 25 -579.454 374.155 4
 -1 -4 24 -71.5396 146.423 4
 1 4 -23 467.146 316.572 5
 -1 -4 23 286.03 273.509 4
 -1 -4 22 -71.9153 126.175 4
 1 4 -22 -185.038 248.562 5
 -1 4 22 -27.1769 99.6758 3
 1 4 -21 -199.551 305.026 5
 -1 -4 21 1.49954 136.58 4
 -1 4 21 102.399 112.023 3
 1 4 -20 772.896 378.164 5
 -1 4 20 302.21 208.413 3
 -1 -4 20 194.609 306.195 4
 1 4 -19 4663.46 952.623 5
 -1 4 19 4838.06 699.417 3
 -1 -4 19 4492.21 933.233 4
 -1 -4 18 176.075 231.298 4
 -1 4 18 85.9871 95.2703 3
 1 4 -18 -98.2054 234.971 5
 1 4 -17 972.005 443.554 5
 -1 4 17 1630.86 399.597 3
 -1 -4 17 1268.13 488.996 4
 1 4 -16 870.971 425.366 5
 -1 -4 16 1244.28 465.953 4
 -1 -4 15 447.137 278.855 4
 -1 4 15 697.664 343.947 5
 -1 4 15 770.244 226.545 1
 1 4 -15 793.505 355.672 5
 -1 4 14 1392.67 456.837 5
 -1 4 14 880.129 241.579 1
 -1 -4 14 807.341 362.516 4
 1 4 -14 557.138 334.011 5
 -1 -4 13 445.109 313.276 4
 1 4 -13 994.827 443.382 5
 -1 4 13 782.323 530.13 5
 -1 4 12 -29.4353 128.632 5
 -1 -4 12 -127.496 215.469 4
 1 4 -12 64.3599 113.133 5
 -1 -4 11 576.172 295.591 4
 -1 4 11 678.743 333.677 5
 1 4 -11 1075.76 403.374 5
 -1 4 10 195.342 206.599 5
 -1 -4 10 98.9824 91.2809 4
 1 4 -10 304.784 241.853 5
 1 4 -9 307.764 212.915 5
 -1 4 9 1087.86 437.255 5
 -1 -4 9 499.527 230.384 4
 -1 4 8 628.229 384.564 5
 -1 -4 8 759.832 367.601 4
 1 4 -8 464.921 290.575 5
 -1 4 7 50624.9 2884.16 5
 1 4 -7 44982.6 2755.24 5
 -1 -4 7 45108.7 2500.37 4
 1 4 -6 112.904 135.064 5
 -1 -4 6 210.817 289.995 4
 -1 4 6 361.444 327.862 5
 -1 -4 5 6152.71 912.617 4
 1 4 -5 6707.61 1043.85 5
 -1 4 5 8094.8 1169.78 5
 -1 -4 4 11833.3 1250.14 4
 -1 4 4 13370.7 1513.44 5
 1 4 -4 11082.7 1332.92 5
 1 -4 -4 11643.9 1113.29 4
 -1 -4 3 1588.63 448.06 4
 -1 4 3 1340.18 494.074 5
 1 4 -3 1534 480.991 5
 1 -4 -3 1309.69 396.251 4
 1 4 -2 624.27 264.778 5
 -1 4 2 1238.98 474.881 5
 -1 -4 2 707.251 278.094 4
 1 -4 -2 1406.84 407.113 4
 1 4 -1 3610.23 735.836 5
 1 -4 -1 3172.37 594.109 4
 -1 -4 1 3615.78 663.079 4
 -1 4 1 2925.07 692.026 5
 -1 4 0 2152 616.229 5
 -1 -4 0 2267.65 507.668 4
 1 4 0 2320.31 595.496 5
 1 -4 0 2651.24 547.978 4
 1 4 1 1898.09 534.372 5
 1 -4 1 1768.46 461.184 4
 -1 4 -1 1800.83 562.024 5
 -1 -4 -1 1477.01 398.566 4
 1 -4 2 1215.88 377.651 4
 1 4 2 953.117 364.652 5
 -1 -4 -2 1541.35 423.351 4
 -1 4 -2 1203.38 461.278 5
 -1 4 -3 710.239 331.551 5
 -1 -4 -3 707.893 292.459 4
 1 -4 3 430.051 271.798 4
 1 4 3 348.224 255.627 5
 1 4 4 434.128 244.495 5
 1 -4 4 274.154 188.765 4
 -1 4 -4 452.464 263.206 5
 -1 4 -5 2552.99 684.627 5
 1 4 5 2221.66 537.68 5
 1 -4 5 2822.43 618.012 4
 1 -4 6 697.146 304.163 4
 1 4 6 828.049 336.777 5
 -1 4 -6 978.672 422.454 5
 1 4 7 3491.47 668.699 5
 -1 4 -7 4541.37 916.948 5
 1 -4 7 4224.63 759.669 4
 -1 4 -8 8316.07 1258.63 5
 1 4 8 8527.51 1029.14 5
 1 -4 8 8184.33 1073.69 4
 -1 4 -9 4809.53 951.879 5
 1 4 9 4945.18 764.112 5
 1 -4 9 5178.56 869.466 4
 1 4 10 9261.68 1054.54 5
 -1 4 -10 8662.25 1293.1 5
 1 -4 10 9266.64 1178.63 4
 -1 4 -11 3704.27 831.178 5
 1 4 11 3635.39 653.203 5
 1 -4 11 4350.71 827.457 4
 -1 4 -12 2561.82 704.789 5
 1 -4 12 3644.11 765.333 4
 1 4 12 2544.04 531.521 5
 -1 4 -13 5180.88 994.474 5
 1 -4 13 6209.44 1015.28 4
 1 4 13 4946.94 734.412 5
 -1 4 -14 930.736 445.438 5
 1 -4 14 179.653 228.747 4
 -1 4 -15 256.652 280.41 5
 1 -4 15 582.539 344.423 4
 -1 4 -16 1771.36 607.592 5
 1 -4 16 1700.85 574.154 4
 -1 4 -17 28756.7 2367.4 5
 1 -4 17 26211.2 2225.2 4
 -1 4 -18 318.199 243.988 5
 1 -4 18 639.664 420.009 4
 -1 4 -19 416.672 229.849 5
 1 -4 19 518.458 308.108 4
 1 4 20 215.905 197.003 3
 1 -4 20 268.305 220.26 4
 -1 4 -20 112.21 97.712 5
 -1 4 -21 20.0249 117.584 5
 1 -4 21 217.014 232.737 4
 1 4 21 62.9744 145.411 3
 -1 4 -22 -122.176 163.604 5
 1 4 22 22.4953 73.9227 3
 1 -4 22 -214.964 222.881 4
 1 4 23 -24.9696 72.506 3
 1 -4 23 -546.693 357.108 4
 1 4 24 51.6634 103.255 3
 1 -4 24 4.59844 172.038 4
 1 4 25 580.427 306.168 3
 1 4 26 297.888 227.334 3
 1 4 27 1199.52 475.855 3
 1 5 -24 1468.81 561.381 5
 1 5 -23 -560.956 363.93 5
 1 5 -22 -325.872 278.212 5
 -1 -5 22 14.0707 103.801 4
 -1 -5 21 349.634 213.87 4
 1 5 -21 567.827 346.348 5
 -1 -5 20 6330.83 1219.05 4
 1 5 -20 5680.66 1136.92 5
 -1 -5 19 0.55951 115.361 4
 1 5 -19 307.896 302.62 5
 1 5 -18 417.79 309.769 5
 -1 -5 18 405.753 354.682 4
 -1 -5 17 2452.89 733.069 4
 1 5 -17 2181.57 709.575 5
 -1 -5 16 -320.904 265.257 4
 1 5 -16 113.783 202.002 5
 1 5 -15 336.509 247.318 5
 -1 -5 15 167.472 207.611 4
 -1 5 14 39.7066 80.2533 5
 1 5 -14 -138.746 317.307 5
 -1 -5 14 -170.897 257.549 4
 -1 -5 13 173.209 228.966 4
 1 5 -13 31.8106 80.5585 5
 -1 5 13 218.596 254.906 5
 -1 5 12 35.7186 125.036 5
 -1 -5 12 71.062 86.7514 4
 1 5 -12 -164.348 152.003 5
 1 5 -11 61.0831 147.995 5
 -1 5 11 517.133 312.964 5
 -1 -5 11 226.953 191.712 4
 -1 5 10 286.904 333.276 5
 -1 -5 10 262.128 287.582 4
 1 5 -10 -97.269 216.954 5
 1 5 -9 554.099 347.474 5
 -1 -5 9 -27.8284 120.152 4
 -1 5 9 547.133 300.404 5
 -1 5 8 4457.1 954.62 5
 -1 -5 8 3371.05 771.789 4
 1 5 -8 3863.26 912.75 5
 1 5 -7 3579.9 851.76 5
 -1 5 7 3409 844.278 5
 -1 -5 7 3995.95 835.015 4
 -1 5 6 4756.63 1009.73 5
 -1 -5 6 3925.08 814.656 4
 1 5 -6 4668.2 959.831 5
 -1 -5 5 35678.7 2425.27 4
 -1 5 5 36695 2813.82 5
 1 5 -5 32250.4 2550.32 5
 1 5 -4 2933.39 771.99 5
 -1 -5 4 2745.56 681.044 4
 -1 5 4 3136.73 832.353 5
 1 -5 -4 3555.23 691.289 4
 1 -5 -3 267.195 168.785 4
 -1 5 3 68.7614 179.816 5
 1 5 -3 420.55 299.027 5
 -1 -5 3 424.333 329.83 4
 -1 5 2 1584.41 571.268 5
 1 -5 -2 1080.53 385.438 4
 1 5 -2 1732.85 611.565 5
 -1 -5 2 1802.05 543.23 4
 1 5 -1 4971.76 983.941 5
 1 -5 -1 5699.59 906.249 4
 -1 5 1 5370.89 1093.79 5
 -1 -5 1 5988.27 961.71 4
 -1 5 0 1225.1 533.386 5
 1 -5 0 1647.68 480.686 4
 1 5 0 2887.57 742.186 5
 -1 -5 0 1612.52 480.292 4
 -1 -5 -1 16135.8 1562.83 4
 -1 5 -1 18797.9 2081.29 5
 1 -5 1 19528.5 1707.2 4
 1 5 1 17035.2 1770.76 5
 1 5 2 10171.3 1350.71 5
 -1 5 -2 12857.7 1734.72 5
 -1 -5 -2 11138.9 1292.3 4
 1 -5 2 10724.3 1282.19 4
 1 5 3 159.483 264.591 5
 -1 5 -3 560.023 379.255 5
 1 -5 3 461.928 318.428 4
 1 -5 4 5760.79 961.8 4
 -1 5 -4 6588.62 1248.74 5
 1 5 4 5104.82 940.338 5
 1 5 5 2299.67 610.96 5
 -1 5 -5 4036.01 976.761 5
 1 -5 5 2730.8 667.254 4
 1 5 6 1283.89 473.949 5
 -1 5 -6 819.332 449.38 5
 1 -5 6 1320.92 472.485 4
 -1 5 -7 1423.89 608.028 5
 1 5 7 1915.55 539.012 5
 1 -5 7 1820.79 550.743 4
 1 -5 8 225.225 203.719 4
 1 5 8 536.333 252.836 5
 -1 5 -8 485.927 396.492 5
 1 5 9 3828.47 768.709 5
 1 -5 9 4123.82 871.331 4
 -1 5 -9 3794.89 948.949 5
 -1 5 -10 122.75 201.117 5
 1 -5 10 90.0749 111.989 4
 -1 5 -11 1647.6 642.203 5
 1 5 11 810.604 346.188 5
 1 -5 11 1835.51 604.526 4
 -1 5 -12 120.929 223.758 5
 1 5 12 94.8888 139.056 5
 1 -5 12 -17.522 193.179 4
 -1 5 -13 -127.443 243.899 5
 1 -5 13 104.787 240.465 4
 -1 5 -14 2020.14 687.56 5
 1 -5 14 1808.75 641.288 4
 -1 5 -15 5214.11 1116.62 5
 1 -5 15 6878.43 1214.56 4
 -1 5 -16 370.41 194.052 5
 1 -5 16 835.777 393.842 4
 1 -5 17 1270.88 546.752 4
 -1 5 -17 702.756 376.14 5
 -1 5 -18 714.058 364.45 5
 1 -5 18 1325.4 568.281 4
 -1 5 -19 247.119 302.843 5
 1 -5 19 180.774 227.662 4
 -1 5 -20 157.89 315.747 5
 1 -5 20 350.312 296.54 4
 1 -5 21 10.4311 217.116 4
 -1 5 -21 -155.693 203.124 5
 -1 5 -22 -184.542 217.566 5
 1 5 22 333.726 221.304 3
 1 5 23 350.441 260.713 3
 1 6 -18 362.926 374.229 5
 -1 -6 17 131.291 194.353 4
 1 6 -17 482.988 349.123 5
 1 6 -16 197.38 260.813 5
 -1 -6 16 589.846 386.84 4
 1 6 -15 -269.53 269.946 5
 -1 -6 15 5.38399 278.956 4
 -1 -6 14 460.225 266.546 4
 1 6 -14 281.915 225.487 5
 1 6 -13 277.413 246.443 5
 -1 -6 13 441.995 320.144 4
 -1 6 12 1858.24 668.659 5
 -1 -6 12 1764.56 654.385 4
 1 6 -12 1787.72 657.352 5
 -1 -6 11 20.0569 126.262 4
 -1 6 11 -16.385 103.55 5
 1 6 -11 160.134 97.975 5
 1 6 -10 -29.898 122.41 5
 -1 -6 10 742.843 417.684 4
 -1 6 10 613.264 381.165 5
 -1 6 9 164.011 220.844 5
 1 6 -9 -206.918 263.875 5
 -1 -6 9 130.495 181.298 4
 1 6 -8 -17.7618 104.938 5
 -1 -6 8 376.294 318.765 4
 -1 6 8 -261.16 269.548 5
 -1 -6 7 1417.1 519.561 4
 1 6 -7 898.047 474.379 5
 -1 6 7 425.162 241.569 5
 -1 -6 6 10.7369 170.16 4
 1 6 -6 650.073 452.893 5
 -1 6 6 636.017 403.071 5
 -1 6 5 2825.73 871.544 5
 -1 -6 5 2777.67 731.129 4
 1 6 -5 2090.81 717.7 5
 -1 6 4 259.404 236.95 5
 -1 -6 4 125.682 195.321 4
 1 6 -4 165.448 127.602 5
 1 6 -3 2441.12 776.837 5
 -1 6 3 3120.17 927.63 5
 1 -6 -3 2049.26 579.724 4
 -1 -6 3 2295.08 680.61 4
 -1 -6 2 -122.49 171.643 4
 -1 6 2 243.056 345.583 5
 1 -6 -2 -53.6033 111.139 4
 1 6 -2 120.297 109.752 5
 1 6 -1 461.915 360.422 5
 -1 6 1 87.3557 216.154 5
 -1 -6 1 62.608 121.849 4
 1 -6 -1 352.092 264.67 4
 1 6 0 672.041 426.9 5
 -1 6 0 289.692 259.885 5
 1 -6 0 730.91 367.447 4
 -1 -6 0 464.769 337.356 4
 -1 -6 -1 5732.24 1019.88 4
 1 6 1 3297.32 853.159 5
 1 -6 1 2727.11 715.976 4
 -1 6 -1 5032.53 1204.15 5
 1 -6 2 9613.79 1336.08 4
 -1 6 -2 10999.8 1795.48 5
 1 6 2 8628.19 1366.7 5
 1 6 3 5756.57 1107.83 5
 -1 6 -3 6474.1 1386.39 5
 1 -6 3 6805.53 1124.58 4
 -1 6 -4 265.031 366.069 5
 1 6 4 293.547 216.747 5
 1 -6 4 201.677 254.22 4
 1 6 5 8.66494 223.404 5
 -1 6 -5 61.7954 165.624 5
 1 -6 5 -61.7403 120.564 4
 1 6 6 -97.8188 240.155 5
 -1 6 -6 -197.149 326.305 5
 1 -6 6 348.386 299.173 4
 1 6 7 1672.42 573.032 5
 1 -6 7 1113.79 497.898 4
 -1 6 -7 2858.74 933.185 5
 -1 6 -8 418.897 416.04 5
 1 6 8 -102.029 214.921 5
 1 -6 8 -45.9781 202.069 4
 1 6 9 -108.505 93.8016 5
 -1 6 -9 205.946 374.362 5
 1 -6 9 -140.789 283.807 4
 1 6 10 381.246 295.092 5
 1 -6 10 -45.2451 185.907 4
 1 6 11 -42.5228 185.289 5
 1 -6 11 35.7393 229.658 4
 -1 6 -12 155.415 128.657 5
 1 -6 12 753.618 435.809 4
 1 -6 13 123.453 180.853 4
 -1 6 -13 -914.566 525.682 5
 -1 6 -14 -232.684 280.078 5
 1 -6 14 -160.134 205.354 4
 1 -6 15 220.499 234.7 4
 -1 6 -15 25.6838 330.541 5
 -1 6 -16 564.795 438.114 5
 1 -6 16 318.203 339.291 4
 -1 6 -17 -349.845 334.246 5
 -1 6 -18 -25.5182 106.126 5
 -1 6 -19 -114.698 215.057 5
 -1 7 11 1041.27 556.01 5
 -1 7 10 673.255 449.58 5
 -1 7 9 -175.842 252.73 5
 -1 7 8 582.319 436.296 5
 1 7 -8 191.257 292.835 5
 -1 -7 8 -480.337 351.554 4
 -1 7 7 448.373 397.789 5
 -1 -7 7 558.731 344.458 4
 1 7 -7 1204.69 644.781 5
 -1 7 6 -158.833 249.189 5
 -1 -7 6 90.2811 267.672 4
 1 7 -6 -188.846 242.051 5
 -1 7 5 281.045 384.547 5
 -1 -7 5 203.414 222.257 4
 1 7 -5 -216.941 261.458 5
 1 7 -4 -101.287 186.603 5
 -1 -7 4 -96.0554 162.158 4
 1 7 -3 250.829 327.675 5
 -1 -7 3 81.2727 154.714 4
 -1 7 3 -244.836 308.96 5
 1 -7 -2 293.374 271.25 4
 1 7 -2 289.971 286.445 5
 -1 -7 2 -54.0748 182.932 4
 -1 7 2 -571.613 449.794 5
 1 -7 -1 27.9563 96.5476 4
 -1 7 1 26.4618 273.998 5
 -1 -7 1 -117.637 80.5502 4
 1 7 -1 -15.605 95.7794 5
 -1 -7 0 65.884 136.458 4
 1 -7 0 -46.8771 103.506 4
 1 7 0 334.958 261.216 5
 -1 7 0 41.3143 157.093 5
 1 7 1 526.402 343.633 5
 -1 7 -1 122.934 331.804 5
 1 -7 1 698.97 402.536 4
 -1 7 -2 -404.073 393.712 5
 1 7 2 144.404 198.639 5
 -1 7 -3 378.641 487.956 5
 1 7 3 -88.34 197.617 5
 1 -7 3 395.199 276.451 4
 1 -7 4 -28.0513 188.21 4
 -1 7 -4 702.967 512.564 5
 1 7 4 245.853 273.458 5
 -1 7 -5 677.786 624.602 5
 1 -7 5 240.905 271.229 4
 1 7 5 457.871 350.817 5
 -1 7 -6 340.333 413.174 5
 1 7 6 -324.784 289.883 5
 1 -7 6 -107.974 179.975 4
 -1 7 -7 156.793 327.774 5
 1 7 7 283.161 275.769 5
 1 -7 7 324.296 288.753 4
 -1 7 -8 560.492 391.079 5
 1 -7 8 -44.5354 265.9 4
 1 7 8 107.046 176.093 5
 1 7 9 -92.7024 242.948 5
 1 -7 9 -120.372 188.592 4
 2 0 -30 1623.53 467.557 2
 2 0 -29 209.346 203.171 2
 -2 0 29 14.1528 51.2168 4
 -2 0 28 -18.3376 103.131 4
 2 0 -28 0.8385 94.6283 2
 -2 0 27 -97.9767 214.413 3
 -2 0 27 83.6392 184.299 4
 2 0 -27 85.4293 129.033 2
 -2 0 26 7273.74 945.901 4
 2 0 -26 7840.44 863.766 2
 -2 0 26 6531.62 1040.6 3
 -2 0 25 137.345 199.856 4
 -2 0 25 145.93 228.616 3
 2 0 -25 150.248 178.965 2
 2 0 -24 22014.6 1317.52 2
 -2 0 24 19252.1 1419.49 4
 -2 0 24 18291.6 1629.79 3
 -2 0 23 285.303 224.798 4
 -2 0 23 103.888 144.806 3
 2 0 -23 142.19 151.41 2
 -2 0 22 23417 1743.42 3
 2 0 -22 23187.4 1243.3 2
 -2 0 21 190.912 182.539 3
 2 0 -21 -34.1407 88.5973 2
 -2 0 20 745.92 289.921 3
 2 0 -20 257.348 153.984 2
 -2 0 19 -43.0643 120.468 3
 2 0 -19 159.605 125.247 2
 -2 0 18 237.325 128.424 3
 2 0 -18 261.237 131.77 2
 -2 0 17 -75.3037 89.4102 3
 -2 0 16 10230.7 950.539 3
 -2 0 15 -111.601 126.267 3
 -2 0 14 6894.15 722.615 3
 -2 0 13 -36.8094 70.3083 3
 -2 0 12 15266.3 993.85 3
 -2 0 11 11.1078 84.3296 3
 -2 0 10 26867 1199.46 3
 -2 0 9 44.0956 55.5709 4
 -2 0 9 4.92529 63.4606 1
 -2 0 8 22077.9 762.736 4
 -2 0 8 24213.2 819.152 1
 -2 0 7 -43.8493 49.9831 1
 2 0 -7 -20.175 49.3253 3
 -2 0 7 28.6147 51.5595 4
 -2 0 6 5374.18 387.54 5
 -2 0 6 5090.9 318.692 4
 2 0 -6 5267.23 280.279 1
 2 0 -6 5545.96 417.362 3
 -2 0 6 5434.25 343.594 1
 -2 0 5 70.2152 56.1261 5
 -2 0 5 52.5885 52.5884 1
 2 0 -5 73.4672 92.4985 1
 -2 0 5 9.53758 19.5214 4
 -2 0 4 655271 3070.99 4
 -2 0 4 644354 3285.01 1
 2 0 -4 628155 2753.57 4
 2 0 -4 655663 2981.15 1
 -2 0 4 618362 3674.96 5
 -2 0 3 100.329 71.1081 5
 -2 0 3 164.297 83.5349 1
 2 0 -3 46.116 46.1619 1
 2 0 -2 986244 3513.12 1
 -2 0 2 999999 3653.15 1
 -2 0 1 26.8159 46.7563 1
 2 0 -1 30.3115 34.7346 1
 2 0 0 24273.1 535.322 1
 -2 0 0 25609.3 535.317 1
 2 0 1 -28.5643 30.1079 1
 -2 0 -1 9.43385 32.5939 1
 2 0 2 -39.6873 35.9858 1
 -2 0 -2 91.8783 44.8753 1
 2 0 3 -33.8981 40.0207 1
 -2 0 -3 60.1354 38.6836 1
 2 0 4 307187 2282.12 1
 -2 0 -4 320836 1772.56 1
 -2 0 -5 -7.73043 14.272 1
 2 0 5 29.2377 25.4828 1
 -2 0 -6 163800 1250.15 1
 -2 0 -7 93.7438 45.2725 1
 2 0 7 70.363 86.4606 3
 2 0 8 17901.8 940.231 3
 -2 0 -8 18704.6 411.135 1
 -2 0 -8 17405.1 401.46 2
 2 0 9 9.70093 46.5161 3
 -2 0 -9 57.472 47.219 2
 -2 0 -9 100.207 40.3446 1
 -2 0 -10 167017 1489.83 2
 -2 0 -10 165953 2243.5 5
 -2 0 -10 169016 1195.9 1
 2 0 10 174031 3209.23 3
 2 0 11 -71.7091 86.076 3
 -2 0 -11 31.649 28.1108 1
 -2 0 -11 -33.3746 34.1476 5
 -2 0 -11 107.855 55.6839 2
 -2 0 -12 21609.6 643.657 2
 -2 0 -12 21386.3 760.348 5
 2 0 12 22318.4 1254.62 3
 -2 0 -12 21389.9 395.499 1
 -2 0 -13 49.4729 43.8994 2
 -2 0 -13 -2.5805 20.9996 5
 2 0 13 79.3081 71.8167 3
 -2 0 -13 30.4302 17.6395 1
 2 0 14 851.493 253.503 3
 -2 0 -14 683.351 107.593 5
 -2 0 -14 783.947 66.5427 1
 -2 0 -14 642.445 130.854 2
 2 0 15 9.05564 80.3628 3
 -2 0 -15 1.6528 16.4087 2
 -2 0 -16 2605.84 305.931 2
 2 0 16 2748.64 511.89 3
 -2 0 -17 79.3872 77.7837 2
 2 0 17 7.18419 77.8195 3
 -2 0 -18 1517.34 250.224 2
 2 0 18 1323.38 362.968 3
 -2 0 -19 61.1104 56.5333 2
 2 0 19 -34.9058 108.704 3
 -2 0 -20 868.993 212.32 2
 2 0 20 953.232 334.976 3
 2 0 21 145.042 187.423 3
 2 0 22 9878.78 1161.71 3
 2 0 23 31.8295 228.325 3
 2 0 24 271.634 185.633 3
 2 0 25 -289.408 222.153 3
 2 0 26 399.893 250.728 3
 2 0 27 847.521 475.28 3
 2 0 28 368.582 250.788 3
 2 0 29 -74.2586 140.213 3
 -2 1 31 300.941 193.103 3
 -2 -1 31 902.093 414.409 4
 -2 -1 30 490.275 323.968 4
 -2 1 30 76.4419 152.607 3
 2 -1 -30 -41.2707 104.122 2
 2 1 -30 421.99 205.998 2
 -2 -1 29 308.029 233.419 4
 2 1 -29 781.085 262.684 2
 2 -1 -29 532.294 276.796 2
 -2 1 29 251.427 243.594 3
 -2 1 28 1396.72 491.42 3
 -2 -1 28 1136.5 448.444 4
 2 -1 -28 1561.91 504.113 2
 2 1 -28 1726.13 390.642 2
 -2 -1 27 5558.61 928.743 4
 2 -1 -27 5854.91 903.673 2
 -2 1 27 6031.68 986.022 3
 2 1 -27 6008.81 671.377 2
 -2 1 26 137.308 164.953 3
 -2 -1 26 391.573 296.293 4
 2 -1 -26 488.392 257.559 2
 -2 -1 25 309.349 211.315 4
 2 -1 -25 820.455 315.907 2
 -2 1 25 693.687 339.815 3
 -2 -1 24 9375.99 1101.31 4
 -2 1 24 11022.7 1214.7 3
 2 -1 -24 10587.6 1112.88 2
 2 -1 -23 9173.23 1004.05 2
 -2 1 23 8120.45 1003.8 3
 -2 -1 23 9533.19 1082.2 4
 -2 1 22 199.81 180.026 3
 2 1 -22 269.976 126.789 5
 -2 -1 22 -16.8859 125.838 4
 2 -1 -22 390.107 230.837 2
 2 -1 -21 1002.53 304.497 2
 2 1 -21 1127.88 245.131 5
 -2 -1 21 1007.95 346.455 4
 -2 1 21 1088.03 375.874 3
 -2 -1 20 105.681 102.766 4
 -2 1 20 14.8676 73.9894 3
 2 -1 -20 -52.9969 50.0962 2
 2 1 -20 29.5813 78.5018 5
 -2 -1 19 162.935 107.304 4
 -2 1 19 330.034 183.42 3
 2 -1 -19 593.351 231.206 2
 2 1 -19 221.983 132.521 5
 -2 1 18 1032.9 312.415 3
 -2 -1 18 839.643 274.527 4
 2 1 -18 955.36 234.666 5
 2 -1 -18 905.387 293.796 2
 2 -1 -17 1115.56 295.635 2
 -2 -1 17 662.327 239.795 4
 -2 1 17 845.105 248.622 3
 2 1 -17 1031.31 234.621 5
 -2 -1 16 497.931 205.04 4
 -2 1 16 94.1267 70.1063 3
 2 -1 -16 345.638 177.068 2
 2 1 -16 336.542 145.591 5
 -2 1 16 7.61036 89.371 1
 -2 -1 15 2898.24 478.823 4
 -2 1 15 2544.02 411.14 3
 2 -1 -15 2466.96 401.61 2
 -2 1 15 2765.28 291.414 1
 2 1 -15 2459.78 359.957 5
 -2 -1 14 2281.81 411.388 4
 2 1 -14 2969.73 399.792 5
 -2 1 14 2545.16 260.673 1
 -2 1 14 2218.49 371.902 3
 2 -1 -14 2477.96 381.921 2
 2 1 -13 5473.06 538.213 5
 -2 1 13 5308.74 547.484 3
 -2 1 13 5438.41 357.531 1
 -2 -1 13 5762.34 633.969 4
 2 -1 -13 5484.6 554.767 2
 -2 -1 12 3266.44 466.564 4
 -2 1 12 3603.59 273.664 1
 2 -1 -12 3641.67 442.157 2
 2 1 -12 3677.83 449.992 5
 -2 1 12 3192.83 402.071 3
 2 1 -11 42983.9 1499.97 5
 -2 1 11 43585.5 1398.17 3
 -2 -1 11 44126.9 1653.65 4
 -2 1 11 43893.5 898.402 1
 2 -1 -11 43217.7 1480.77 2
 -2 1 10 49772.7 1400.22 3
 -2 -1 10 49734.6 1717.19 4
 -2 1 10 49483.7 917.667 1
 2 1 -10 49807.7 1599.28 5
 2 -1 -10 51055 1553.65 2
 2 -1 -9 9554.83 656.644 2
 -2 -1 9 9169.41 722.099 4
 -2 1 9 9531.97 395.84 1
 -2 1 9 8877.87 547.913 3
 2 1 -9 8876.14 667.812 5
 -2 1 8 5258.77 388.512 3
 -2 1 8 5965.2 316.654 1
 -2 -1 8 5922.37 557.927 4
 2 -1 -8 5807.42 510.451 2
 2 1 -8 6042.22 543.772 5
 -2 1 7 5988.74 374.716 3
 -2 1 7 5639.28 310.881 1
 2 1 -7 5890.88 536.048 5
 -2 -1 7 6588.65 572.148 4
 2 -1 -7 6016.76 506.16 2
 -2 1 6 62984.4 1056.53 3
 2 1 -6 58369.7 1663.72 5
 -2 1 6 61254.6 1069.91 1
 -2 -1 6 60924.9 1711.39 4
 2 1 -6 61714.5 1663.55 4
 2 -1 -6 59700.9 1554.47 2
 2 -1 -5 13134 715.772 2
 -2 1 5 13910.1 494.356 4
 2 1 -5 13461 778.296 4
 -2 -1 5 14471.1 819.579 4
 -2 1 5 13512.9 418.964 3
 -2 1 5 13420.2 520.451 1
 2 1 -5 13799.4 785.53 5
 -2 1 4 255208 2441.04 1
 2 1 -4 256165 3387.76 4
 -2 -1 4 259145 3351.05 4
 -2 1 4 252537 1953.13 4
 2 1 -4 257620 3352.09 5
 2 -1 -4 265102 3124.41 2
 2 1 -3 822998 6024.75 4
 -2 1 3 867223 4685.77 1
 2 -1 -3 840520 3488.71 4
 2 1 -3 865193 5993.5 5
 -2 1 3 847017 3517.16 4
 2 -1 -3 848389 5634.11 2
 2 1 -2 13308.6 728.453 5
 -2 1 2 12326.6 425.327 4
 -2 -1 2 12873.9 701.437 4
 2 -1 -2 12601.4 476.655 4
 2 -1 -2 12888.3 680.998 2
 -2 1 2 12583 603.272 2
 2 1 -2 12618.8 746.107 4
 -2 1 2 12982.7 593.84 1
 2 1 -1 6119.76 476.756 5
 -2 -1 1 5759.69 526.504 5
 -2 1 1 5755.58 406.078 1
 -2 1 1 5541.24 292.438 4
 2 1 -1 5575.42 491.058 4
 2 -1 -1 5628.9 345.105 4
 -2 1 1 5568.01 401.188 2
 -2 -1 1 5405.85 457.513 4
 -2 1 0 3697.92 339.85 1
 2 1 0 3513.65 385.456 4
 2 -1 0 4066.8 220.453 3
 2 1 0 4034.26 367.215 5
 2 -1 0 3933.27 302.091 4
 -2 -1 0 3761.32 403.435 5
 -2 1 0 3673.22 331.023 2
 2 1 1 2807.31 344.99 4
 2 -1 1 2721.46 265.129 4
 2 1 1 2941.28 303.39 5
 -2 -1 -1 2542.86 329.917 5
 2 -1 1 2852.02 218.814 3
 -2 1 -1 2634.88 207.85 3
 -2 1 -1 2434.16 268.188 2
 -2 1 -1 2855.07 304.015 1
 -2 1 -2 6865.54 376.343 3
 2 -1 2 6493.64 379.375 3
 -2 -1 -2 6766.04 516.276 5
 -2 1 -2 6672.26 471.28 1
 2 1 2 6380.68 388.185 1
 2 -1 2 7101.95 440.97 4
 2 1 2 6624.04 432.855 5
 2 1 3 12628.2 562.99 5
 -2 1 -3 12521.6 567.587 3
 -2 -1 -3 12373.8 675.958 5
 2 1 3 12611.9 524.114 1
 2 -1 3 12782.6 588.6 3
 -2 -1 -4 123358 2069.74 5
 -2 1 -4 127061 1967.18 3
 2 1 4 127064 1638.14 5
 2 1 4 124922 1532.92 1
 2 -1 4 126307 2013.03 3
 2 1 5 10561.2 425.828 5
 -2 -1 -5 9798.8 562.167 5
 2 -1 5 9220.08 588.326 3
 2 1 5 9135.75 383.432 1
 -2 -1 -6 1014.57 180.351 5
 2 -1 6 1472.03 252.792 3
 2 1 6 1306.44 131.716 1
 2 1 6 1215.84 130.021 5
 2 1 7 22799.7 477.732 1
 -2 -1 -7 22678 786.867 5
 2 -1 7 22269.4 1023.42 3
 2 1 7 23419.3 750.441 2
 2 1 8 2043.55 128.309 1
 -2 -1 -8 1950.06 223.158 5
 2 1 8 1990.55 203.848 2
 2 -1 8 2807.1 387.877 3
 2 1 9 142458 994.049 1
 2 1 9 145460 1607.31 2
 2 -1 9 141841 2872.54 3
 2 -1 10 126309 2829.25 3
 -2 1 -10 123573 2970.47 5
 2 1 10 122816 1347.75 2
 2 -1 11 13071.1 954.813 3
 -2 1 -11 11325 906.889 5
 -2 1 -12 54391.4 1991.46 5
 2 -1 12 55514.4 2065.45 3
 -2 1 -13 288.022 136.707 5
 2 1 13 261 166.462 3
 2 -1 13 284.249 166.221 3
 -2 1 -14 553.679 210.709 5
 2 -1 14 902.296 286.436 3
 2 1 14 703.366 236.277 3
 2 -1 15 214.143 154.973 3
 -2 1 -15 385.395 179.667 5
 2 1 15 366.671 160.081 3
 2 -1 16 281.886 188.74 3
 2 1 16 426.507 211.786 3
 -2 1 -16 200.58 133.277 5
 2 -1 17 63.1111 109.562 3
 -2 1 -17 -63.3438 92.8367 5
 2 1 17 79.495 106.115 3
 2 1 18 35536.2 1957.76 3
 2 -1 18 35532.3 2016.92 3
 -2 1 -18 36979.1 1589.86 5
 2 1 19 7022.94 899.792 3
 2 -1 19 6965.54 917.244 3
 2 -1 20 618.401 283.001 3
 2 1 20 849.411 333.447 3
 2 1 21 9657.41 1114.77 3
 2 -1 21 9308.71 1141.4 3
 2 1 22 3130.12 645.679 3
 2 -1 22 3214.14 686.834 3
 2 -1 23 115.363 148.124 3
 2 1 23 345.578 245.155 3
 2 -1 24 1149.25 426.799 3
 2 1 24 1468.55 474.045 3
 2 1 25 643.198 323.803 3
 2 -1 25 -163.997 213.361 3
 2 -1 26 101.386 194.269 3
 2 1 26 96.5259 163.819 3
 2 -1 27 92.5933 178.048 3
 2 1 27 71.0636 152.437 3
 2 -1 28 -6.70037 139.761 4
 2 -1 28 5.48791 76.5518 3
 2 -1 29 327.682 248.14 4
 2 1 29 179.017 181.024 3
 -2 -2 31 78.8933 150.247 4
 -2 -2 30 692.367 379.666 4
 -2 -2 29 76.4843 139.273 4
 -2 2 29 81.1786 101.951 3
 2 -2 -29 -135.65 226.142 2
 2 -2 -28 108.877 104.32 2
 -2 2 28 -119.822 152.018 3
 -2 -2 27 101.022 209.038 4
 -2 2 27 405.183 264.017 3
 2 -2 -27 -215.63 243.464 2
 -2 -2 26 1.28034 65.1097 4
 2 -2 -26 122.998 150.446 2
 -2 2 26 67.1421 127.051 3
 -2 -2 25 -53.7756 144.685 4
 -2 2 25 -92.7209 188.187 3
 2 -2 -25 -27.8707 126.221 2
 -2 -2 24 226.3 197.841 4
 2 -2 -24 343.735 192.105 2
 -2 2 24 703.98 312.688 3
 -2 -2 23 554.789 297.57 4
 2 2 -23 543.26 237.323 5
 -2 2 23 120.22 103.558 3
 2 -2 -23 216.383 187.955 2
 -2 -2 22 3646.57 743.029 4
 2 -2 -22 3899.44 734.252 2
 -2 2 22 2914.21 568.35 3
 2 2 -22 3450.48 550.492 5
 -2 2 21 771.154 276.284 3
 2 -2 -21 932.638 331.054 2
 -2 -2 21 727.139 288.256 4
 2 2 -21 1199.9 331.399 5
 -2 -2 20 -104.647 132.881 4
 2 2 -20 47.4955 100.104 5
 -2 2 20 -26.0209 56.4741 3
 2 -2 -20 217.291 160.708 2
 -2 -2 19 1080.84 385.694 4
 -2 2 19 758.466 256.255 3
 2 2 -19 767.368 288.742 5
 2 -2 -19 780.153 296.003 2
 2 2 -18 279.912 179.236 5
 -2 2 18 112.007 73.5004 3
 2 -2 -18 146.723 138.7 2
 -2 2 18 158.699 76.6332 1
 -2 -2 18 38.6179 94.3688 4
 -2 -2 17 766.99 290.171 4
 2 -2 -17 1068.92 334.372 2
 -2 2 17 1028.43 165.487 1
 2 2 -17 848.109 329.935 5
 -2 2 17 1067.96 277.313 3
 -2 2 16 11231 878.215 3
 -2 2 16 11545.1 504.779 1
 -2 -2 16 10712.8 1096.78 4
 2 -2 -16 10460.9 1036.58 2
 2 2 -16 10491.9 990.814 5
 2 2 -15 2172.44 459.243 5
 -2 -2 15 2197.55 481.374 4
 -2 2 15 2381.24 227.321 1
 -2 2 15 1841.06 342.867 3
 2 -2 -15 2038.4 448.811 2
 2 -2 -14 2306.93 470.701 2
 2 2 -14 2286.78 466.515 5
 -2 2 14 2171.26 217.853 1
 -2 2 14 2115.63 349.028 3
 -2 -2 14 1826.62 426.787 4
 -2 2 13 133.507 54.8545 1
 2 -2 -13 58.6437 93.9452 2
 -2 2 13 237.622 129.388 3
 2 2 -13 -25.7303 125.857 5
 -2 -2 13 106.444 144.78 4
 -2 -2 12 40071.4 1945.09 4
 -2 2 12 42259.7 1403.84 3
 -2 2 12 41698.9 1013.81 1
 2 -2 -12 41701.2 1912.07 2
 2 2 -12 43827.8 2028.19 5
 -2 2 11 51245.2 1194.22 1
 2 2 -11 49708 2163.2 5
 -2 2 11 49153.5 1416.97 3
 -2 -2 11 47783 2078.08 4
 2 -2 -11 51742.4 2092.07 2
 2 -2 -10 1949.4 399.905 2
 -2 2 10 2269.75 287.598 3
 2 2 -10 2159.54 447.544 5
 -2 -2 10 2600.66 497.426 4
 -2 2 10 2249.52 265.722 1
 2 -2 -9 -4.24785 110.194 2
 -2 2 9 66.3259 52.2209 1
 2 2 -9 -104.417 188.762 5
 -2 2 9 2.03959 20.8213 3
 -2 -2 9 87.6539 92.8998 4
 -2 2 8 14225.4 746.029 1
 2 2 -8 14316.1 1132.26 5
 -2 2 8 14485.8 637.803 3
 2 -2 -8 13326.7 993.204 2
 -2 -2 8 14224.1 1075.44 4
 2 2 -7 5621.84 702.173 5
 -2 2 7 5024.54 518.622 4
 -2 2 7 4187.9 425.716 1
 -2 -2 7 4867.56 624.367 4
 -2 2 6 6698.75 570.094 4
 -2 2 6 6888.84 560.531 1
 -2 -2 6 6990.48 738.209 4
 2 2 -6 7781.91 811.643 5
 -2 2 5 60.7318 77.6295 4
 2 2 -5 51.9163 73.673 5
 -2 2 5 13.131 111.979 1
 -2 -2 5 37.6618 71.7093 4
 2 2 -4 4358.2 600.534 5
 2 -2 -4 3659.72 389.498 4
 -2 2 4 3286.18 384.783 4
 -2 -2 4 3940.22 541.484 4
 2 2 -3 35456.5 1672.95 5
 2 -2 -3 33416.4 1222.02 4
 -2 -2 3 31444.7 1499.8 4
 -2 2 3 33113.9 1231.09 4
 2 2 -2 5317.89 640.418 5
 -2 -2 2 4537.39 553.94 4
 2 -2 -2 4418.85 452.469 4
 -2 2 2 4469.6 451.638 4
 2 -2 -1 40001.9 1392.91 4
 2 2 -1 39632.4 1709.24 5
 -2 -2 1 39197.7 1609.13 4
 -2 2 1 40511.7 1369.91 4
 -2 2 0 11267.3 555.895 3
 -2 -2 0 10840.2 834.652 4
 2 -2 0 10988.4 750.298 4
 2 2 0 11207.7 899.696 5
 -2 2 -1 63556.5 1406.3 3
 2 -2 1 62248.7 1836.53 4
 2 2 1 64385.6 2085.58 5
 2 2 2 159636 3227.05 5
 -2 2 -2 162154 2356.16 3
 2 -2 2 159721 3041.51 4
 2 -2 3 9855.5 783.09 4
 -2 2 -3 10354.7 624.059 3
 2 2 3 11013.5 820.866 5
 2 2 4 42529 1571.05 5
 2 -2 4 41522.7 1622 4
 2 -2 5 712.948 216.399 4
 2 2 5 755.887 203.183 5
 2 2 6 5738.06 542.93 5
 2 -2 6 5762.4 587.406 3
 2 -2 6 5896.51 641.788 4
 2 2 7 6309.64 545.293 5
 -2 -2 -7 6066.57 638.857 5
 2 -2 7 6766.97 654.612 3
 2 -2 7 6596.21 692.559 4
 2 -2 8 1323.11 306.742 4
 2 2 8 1156.45 218.551 5
 -2 2 -8 1006.98 346.221 5
 2 -2 8 1262.65 290.162 3
 -2 -2 -8 1340.51 288.015 5
 2 -2 9 14150.4 1021.1 3
 2 2 9 13220.2 690.232 5
 2 -2 9 13835.7 1036.27 4
 -2 2 -9 11796.7 1153.28 5
 -2 2 -10 18307.2 1436.34 5
 2 -2 10 19688.1 1270.94 4
 2 2 10 18442.4 738 5
 2 -2 10 17810.8 1193.85 3
 -2 2 -11 2495.31 533.438 5
 2 2 11 2060.39 215.652 5
 2 -2 11 2067.04 430.904 3
 2 -2 11 1714.35 390.871 4
 2 2 11 1853.67 196.562 1
 2 2 12 8458.89 348.964 1
 2 -2 12 8419.77 875.669 3
 2 -2 12 9544.13 922.255 4
 -2 2 -12 8183.33 981.722 5
 2 2 12 8792.19 342.352 5
 2 -2 13 2996.65 545.945 3
 -2 2 -13 2851.3 570.543 5
 2 2 13 2902.82 157.714 1
 2 -2 13 3321.48 575.928 4
 -2 2 -14 185.91 177.389 5
 2 -2 14 134.19 171.527 4
 2 -2 14 60.7635 76.2792 3
 2 -2 15 -90.8733 195.878 3
 2 -2 15 159.01 148.694 4
 -2 2 -15 -18.7953 71.3051 5
 2 -2 16 17844.9 1446.93 3
 2 -2 16 16836 1369.38 4
 -2 2 -16 18799.3 1486.52 5
 -2 2 -17 7867.27 979.474 5
 2 -2 17 9680.15 1087.88 3
 2 -2 17 9739.54 1069.13 4
 2 2 17 8767.82 970.359 3
 -2 2 -18 253.901 192.593 5
 2 -2 18 324.839 222.705 4
 2 2 18 186.971 173.046 3
 2 -2 18 106.736 102.404 3
 2 -2 19 4112.72 748.734 3
 2 -2 19 3639.78 676.269 4
 -2 2 -19 3615.7 660.607 5
 2 2 19 3689.45 660.245 3
 2 -2 20 279.445 221.677 3
 2 2 20 926.342 348.591 3
 2 -2 20 715.634 309.511 4
 2 -2 21 2636.68 640.806 3
 2 2 21 3078.41 641.107 3
 2 -2 21 2523.35 596.925 4
 2 2 22 2374.88 560.155 3
 2 -2 22 2232.33 600.412 3
 2 -2 22 2342.6 603.116 4
 2 2 23 47.9793 82.9881 3
 2 -2 23 -109.223 209.179 3
 2 -2 24 -61.1571 161.014 4
 2 2 24 34.7489 66.3918 3
 2 -2 25 956.597 416.937 3
 2 -2 25 495.331 321.008 4
 2 2 25 453.098 293.942 3
 2 -2 26 -85.2958 236.042 3
 2 2 26 647.093 342.965 3
 2 -2 26 232.916 208.43 4
 2 -2 27 -192.579 196.479 4
 2 -2 27 274.46 239.024 3
 2 2 27 165.78 220.196 3
 2 2 28 346.77 270.922 3
 2 -2 28 5.82476 80.5277 4
 -2 -3 29 956.498 489.582 4
 -2 -3 28 779.645 431.739 4
 -2 -3 27 603.709 344.557 4
 -2 -3 26 959.571 461.094 4
 -2 -3 25 93.2992 144.131 4
 2 3 -24 147.093 117.048 5
 -2 -3 24 344.767 259.361 4
 -2 3 23 2413.65 533.256 3
 2 3 -23 2311.95 552.486 5
 -2 -3 23 1223.72 450.533 4
 2 3 -22 1992.83 531.288 5
 -2 3 22 2422.9 515.262 3
 -2 -3 22 2079.84 599.168 4
 2 3 -21 563.108 302.399 5
 -2 3 21 283.79 161.538 3
 -2 -3 21 614.49 365.418 4
 -2 3 20 10616.6 1007.26 3
 2 3 -20 9671.53 1157.46 5
 -2 -3 20 9641.66 1249.26 4
 2 3 -19 182.175 170.487 5
 -2 3 19 191.882 137.154 3
 -2 -3 19 234.878 278.522 4
 -2 3 18 4684.26 621.345 3
 -2 -3 18 5517.22 919.076 4
 2 3 -18 5775.68 898.83 5
 -2 -3 17 2263.71 584.886 4
 -2 3 17 2897.46 283.858 1
 2 3 -17 3113.43 641.952 5
 -2 3 17 2561.28 444.223 3
 2 3 -16 2533.68 594.242 5
 -2 3 16 2075.88 251.564 1
 -2 3 16 2013.98 375.366 3
 -2 -3 16 2746.8 650.566 4
 2 3 -15 -194.724 268.964 5
 -2 3 15 135.148 61.8074 1
 -2 3 15 185.623 119.685 3
 -2 -3 15 296.438 228.409 4
 2 3 -14 21.1555 196.918 5
 -2 3 14 301.114 95.4321 1
 -2 3 14 246.995 130.668 3
 -2 -3 14 162.832 177.411 4
 -2 3 13 -81.5315 89.5447 1
 -2 3 13 71.498 44.8315 3
 2 3 -13 128.369 120.858 5
 -2 -3 13 79.4775 95.2518 4
 -2 -3 12 5373.43 805.768 4
 -2 3 12 4888 500.155 1
 2 3 -12 5518.55 872.307 5
 -2 3 12 5028.13 503.737 3
 2 3 -11 1630.33 496.157 5
 -2 -3 11 1704.46 461.918 4
 -2 3 11 1914.01 323.828 1
 2 3 -10 170.573 112.675 5
 -2 3 10 295.929 132.538 1
 -2 -3 10 281.556 156.799 4
 2 3 -9 627.304 310.548 5
 -2 3 9 914.548 237.824 1
 -2 -3 9 1145.63 352.47 4
 2 3 -8 4482.5 752.912 5
 -2 -3 8 4553.99 708.846 4
 2 3 -7 15890.2 1409.65 5
 -2 -3 7 15040.2 1278.2 4
 2 3 -6 3328.15 632.577 5
 -2 -3 6 4204.61 663.153 4
 2 -3 -5 430.462 181.237 4
 -2 -3 5 683.569 262.182 4
 2 3 -5 540.259 340.183 5
 2 3 -4 37098.9 2135.05 5
 2 -3 -4 36542.7 1613.34 4
 -2 -3 4 38078.2 1992.47 4
 2 3 -3 9365.08 1068.84 5
 2 -3 -3 9898.9 854.93 4
 -2 -3 3 8696.31 939.352 4
 2 3 -2 -134.188 175.28 5
 -2 -3 2 -90.3848 169.867 4
 2 -3 -2 -46.4148 46.2598 4
 -2 -3 1 5891.35 760.16 4
 2 -3 -1 6496.2 717.551 4
 2 3 -1 6149.53 847.923 5
 2 -3 0 19842.2 1275.58 4
 2 3 0 20514 1496.66 5
 -2 -3 0 20271.4 1388.92 4
 -2 -3 -1 26937.7 1579.2 4
 2 -3 1 25856.3 1474.67 4
 2 3 1 25772.4 1672.39 5
 2 3 2 22447.1 1543.25 5
 2 -3 2 22969.3 1419.13 4
 2 3 3 839.956 294.457 5
 2 -3 3 580.879 203.294 4
 2 3 4 30600.9 1731.8 5
 2 -3 4 29356 1666.79 4
 2 3 5 2901.73 528.897 5
 2 -3 5 2448.94 480.965 4
 -2 3 -6 7978.67 1130.3 5
 2 3 6 5261.42 692.88 5
 2 -3 6 6453.16 808.929 4
 2 3 7 7585.92 814.307 5
 -2 3 -7 9106.52 1219.79 5
 2 -3 7 7207.16 875.166 4
 2 3 8 558.119 210.231 5
 -2 3 -8 602.683 331.723 5
 2 -3 8 811.983 282.017 4
 2 -3 9 193.972 146.4 4
 -2 3 -9 69.8858 87.1228 5
 2 3 9 2.07201 65.5568 5
 2 -3 10 123.922 133.926 4
 2 3 10 51.0193 83.635 5
 -2 3 -10 -124.875 156.017 5
 2 -3 11 1008.29 379.277 4
 2 3 11 865.606 248.069 5
 -2 3 -11 827.002 385.647 5
 2 -3 12 2328.43 561.07 4
 -2 3 -12 1550.4 494.068 5
 2 3 12 1569.41 307.371 5
 2 -3 13 4398.7 762.31 4
 2 3 13 3813.98 459.104 5
 -2 3 -13 4516.17 865.459 5
 -2 3 -14 25886.6 2037 5
 2 -3 14 24966.6 1851.92 4
 -2 3 -15 13660.3 1484.73 5
 2 -3 15 13194.1 1363.59 4
 2 -3 16 2442.36 592.063 4
 -2 3 -16 2424.44 629.809 5
 2 -3 17 294.996 215.963 4
 -2 3 -17 315.723 242.97 5
 -2 3 -18 1822.12 545.733 5
 2 -3 18 1113.8 437.151 4
 2 -3 19 492.235 288.859 4
 -2 3 -19 310.963 176.916 5
 2 3 19 606.564 267.786 3
 2 -3 20 4086.55 811.38 4
 2 3 20 5700.4 853.584 3
 -2 3 -20 3493.6 760.408 5
 2 -3 21 675.056 358.763 4
 2 3 21 86.9475 202.268 3
 2 -3 22 827.093 371.75 4
 2 3 22 578.718 266.348 3
 2 -3 23 583.899 381.108 4
 2 3 23 -23.1309 96.165 3
 2 3 24 398.492 250.825 3
 2 -3 24 77.7126 129.823 4
 2 -3 25 379.408 345.831 4
 2 3 25 27.0106 169.646 3
 2 -3 26 793.177 410.824 4
 2 3 26 318.392 271.908 3
 2 3 27 107.899 198.209 3
 -2 -4 26 -221.211 237.777 4
 -2 -4 25 75.7889 131.069 4
 2 4 -24 14.0418 104.51 5
 -2 -4 24 97.4608 89.5838 4
 2 4 -23 34.8136 146.511 5
 -2 -4 23 307.412 286.869 4
 2 4 -22 2480.06 655.416 5
 -2 -4 22 3896.33 916.979 4
 2 4 -21 -94.2908 200.212 5
 -2 -4 21 252.976 273.79 4
 2 4 -20 1175.57 466.728 5
 -2 -4 20 1833.89 609.353 4
 -2 -4 19 3921.24 870.463 4
 2 4 -19 4390.61 887.209 5
 2 4 -18 34.8221 118.453 5
 -2 -4 18 245.781 191.468 4
 2 4 -17 103.364 149.103 5
 -2 -4 17 136.312 197.117 4
 -2 4 16 1198.48 267.078 1
 -2 -4 16 948.039 419.211 4
 2 4 -16 1343.61 495.431 5
 -2 4 16 954.518 272.577 3
 -2 4 15 475.265 172.942 1
 2 4 -15 1088.07 455.737 5
 -2 4 15 716.856 221.079 3
 -2 -4 15 692.995 342.632 4
 -2 4 14 2025.06 374.226 1
 2 4 -14 2715.48 688.009 5
 -2 -4 14 2644.74 652.32 4
 -2 -4 13 456.803 284.88 4
 -2 4 13 355.508 151.32 1
 2 4 -13 36.5416 118.614 5
 2 4 -12 89.5602 121.426 5
 -2 -4 12 234.286 199.111 4
 -2 4 12 153.944 73.5761 1
 2 4 -11 2001.19 597.807 5
 -2 4 11 2088.81 411.744 1
 -2 -4 11 2280.3 618.248 4
 -2 -4 10 5349.71 906.345 4
 2 4 -10 5941.51 1006.56 5
 2 4 -9 24164.2 2012.92 5
 -2 -4 9 22065.8 1804.93 4
 -2 -4 8 2489.17 612.522 4
 2 4 -8 2485.36 677.933 5
 2 4 -7 10166.4 1302.33 5
 -2 -4 7 9850.02 1168.06 4
 -2 -4 6 14.1338 155.187 4
 2 4 -6 44.0164 134.371 5
 2 4 -5 6870.26 1053.13 5
 2 -4 -5 6616.63 806.841 4
 -2 -4 5 6519.94 943.155 4
 2 -4 -4 -1.45229 81.7894 4
 2 4 -4 274.269 239.211 5
 -2 -4 4 91.3633 69.4037 4
 2 -4 -3 1297.02 363.608 4
 2 4 -3 1188.34 419.071 5
 -2 -4 3 1475.38 434.244 4
 2 4 -2 476.51 274.871 5
 -2 -4 2 416.679 222.14 4
 2 -4 -2 346.994 209.253 4
 2 4 -1 66.5453 105.716 5
 -2 -4 1 60.5685 98.5309 4
 2 -4 -1 240.2 166.287 4
 2 4 0 1178.51 390.346 5
 -2 -4 0 457.19 261.518 4
 2 -4 0 1332.08 398.725 4
 2 4 1 6013.66 930.701 5
 -2 4 -1 7499.06 1259.02 5
 -2 -4 -1 7394.35 968.306 4
 2 -4 1 6095.78 829.161 4
 2 4 2 224.057 141.596 5
 -2 4 -2 524.177 443.354 5
 2 -4 2 121.477 94.471 4
 2 4 3 3129.8 645.73 5
 -2 4 -3 2568.57 730.856 5
 2 -4 3 3032.09 610.967 4
 2 4 4 332.94 206.641 5
 -2 4 -4 405.961 343.351 5
 2 -4 4 108.073 76.8775 4
 2 -4 5 493.183 238.852 4
 2 4 5 1177.38 383.58 5
 -2 4 -6 2582.98 749.485 5
 2 -4 6 2407.46 560.285 4
 2 4 6 2223.12 527.046 5
 2 4 7 126.041 163.095 5
 -2 4 -7 515.091 394.922 5
 2 -4 7 141.381 157.589 4
 -2 4 -8 5854.79 1107.5 5
 2 -4 8 4071.93 770.217 4
 2 4 8 3945.98 698.139 5
 2 4 9 92.5297 145.039 5
 -2 4 -9 -73.406 100.202 5
 2 -4 9 -50.6666 129.321 4
 -2 4 -10 151.494 111.485 5
 2 4 10 225.753 169.973 5
 2 -4 10 469.399 237.152 4
 2 4 11 1136.46 353.223 5
 -2 4 -11 1026.46 460.248 5
 2 -4 11 681.088 372 4
 2 4 12 2514.62 502.105 5
 -2 4 -12 2041.65 650.138 5
 2 -4 12 2086.95 592.604 4
 2 -4 13 31741.8 2307.14 4
 -2 4 -13 30501 2553.11 5
 -2 4 -14 21209.6 2124.17 5
 2 -4 14 25153 2094.9 4
 -2 4 -15 667.738 391.566 5
 2 -4 15 1529.2 562.859 4
 -2 4 -16 661.452 390.117 5
 2 -4 16 560.149 338.31 4
 -2 4 -17 1200.54 501.018 5
 2 -4 17 2148.93 655.725 4
 2 -4 18 639.617 342.834 4
 -2 4 -18 485.567 301.13 5
 -2 4 -19 299.843 137.764 5
 2 -4 19 208.975 239.367 4
 -2 4 -20 455.49 317.877 5
 2 -4 20 321.851 285.759 4
 -2 4 -21 235.758 268.869 5
 2 4 21 -198.764 174.959 3
 2 -4 21 -178.649 264.158 4
 2 -4 22 513.193 345.484 4
 2 4 22 26.0281 156.02 3
 2 4 23 1244.87 426.85 3
 2 -4 23 927.054 428.624 4
 2 4 24 863.737 376.258 3
 2 4 25 11.93 69.4776 3
 2 4 26 983.094 409.181 3
 2 5 -24 242.099 239.693 5
 2 5 -23 195.703 212.937 5
 -2 -5 22 215.513 242.548 4
 2 5 -22 100.834 169.252 5
 2 5 -21 4402.96 984.279 5
 -2 -5 21 5478.29 1147.33 4
 2 5 -20 447.183 330.175 5
 -2 -5 20 642.269 432.845 4
 2 5 -19 306.463 251.275 5
 -2 -5 19 375.69 374.192 4
 -2 -5 18 3279.03 847.252 4
 2 5 -18 3286.07 844.701 5
 2 5 -17 779.817 428.809 5
 -2 -5 17 157.026 227.729 4
 2 5 -16 157.376 239.317 5
 -2 -5 16 120.056 218.066 4
 2 5 -15 170.884 244.736 5
 -2 -5 15 255.386 300.068 4
 -2 5 15 378.362 346.762 5
 -2 5 15 -102.348 121.754 1
 -2 5 14 -125.984 266.55 5
 -2 -5 14 162.346 211.87 4
 2 5 -14 -44.6205 133.113 5
 -2 5 14 -84.93 120.095 1
 2 5 -13 75.306 90.3689 5
 -2 5 13 14.219 134.035 5
 -2 -5 13 177.783 204.832 4
 -2 5 13 -87.7096 151.761 1
 2 5 -12 90.0945 113.246 5
 -2 5 12 -91.1777 142.363 1
 -2 -5 12 110.549 237.484 4
 2 5 -11 30.0132 111.723 5
 -2 5 11 101.15 153.139 5
 -2 -5 11 -202.229 206.686 4
 -2 5 10 -23.6917 108.535 5
 -2 -5 10 52.7186 131.283 4
 2 5 -10 84.5739 220.519 5
 2 5 -9 794.428 399.175 5
 -2 5 9 1555.38 638.875 5
 -2 -5 9 319.322 280.785 4
 -2 5 8 39.5618 162.253 5
 2 5 -8 356.349 273.419 5
 -2 -5 8 147.769 239.43 4
 2 5 -7 12035.1 1555.87 5
 -2 -5 7 10728 1365.85 4
 -2 5 7 14894.6 1946.67 5
 -2 5 6 24359.4 2516.43 5
 2 5 -6 20452.3 2009.11 5
 -2 -5 6 21751.5 1912.54 4
 2 5 -5 876.394 415.802 5
 2 -5 -5 1778.52 492.892 4
 -2 -5 5 1300.54 484.475 4
 -2 5 5 707.73 430.23 5
 -2 5 4 749.796 451.341 5
 2 5 -4 513.996 353.948 5
 2 -5 -4 673.326 298.833 4
 -2 -5 4 406.156 233.9 4
 2 5 -3 342.684 284.837 5
 -2 -5 3 294.572 209.924 4
 2 -5 -3 869.746 345.799 4
 -2 5 3 295.059 317.924 5
 2 5 -2 3849.43 822.674 5
 -2 -5 2 3828 775 4
 -2 5 2 3801.67 990.73 5
 2 -5 -2 3686.68 706.878 4
 2 5 -1 833.688 397.57 5
 -2 5 1 740.705 421.958 5
 -2 -5 1 813.429 333.777 4
 2 -5 -1 1572.76 479.937 4
 -2 -5 0 1154.8 392.973 4
 -2 5 0 1825.16 723.805 5
 2 -5 0 1286.69 432.281 4
 2 5 0 931.221 436.063 5
 -2 5 -1 -67.1508 377.308 5
 -2 -5 -1 184.708 169.52 4
 2 -5 1 -62.6834 163.159 4
 2 5 1 93.9503 161.465 5
 2 5 2 5257.32 962.629 5
 -2 5 -2 5480.34 1220.23 5
 2 -5 2 4912.63 877.143 4
 2 5 3 2111.34 624.743 5
 -2 5 -3 1656.4 650.599 5
 2 -5 3 1384.05 444.035 4
 2 5 4 32.803 136.389 5
 -2 5 -4 379.485 330.902 5
 2 -5 4 547.611 317.839 4
 -2 5 -5 1457.05 608.962 5
 2 -5 5 1916.71 573.398 4
 2 5 5 1234.14 458.566 5
 2 5 6 2362.84 615.771 5
 -2 5 -6 3567.76 1021.31 5
 2 -5 6 2523.42 646.324 4
 2 5 7 388.62 265.772 5
 -2 5 -7 572.217 419.393 5
 2 -5 7 -7.08062 162.647 4
 2 5 8 1954.03 541.988 5
 -2 5 -8 1905.74 704.35 5
 2 -5 8 2467.84 654.054 4
 -2 5 -9 438.327 319.778 5
 2 5 9 251.973 216.03 5
 2 -5 9 39.4519 132.428 4
 2 5 10 1817.15 510.325 5
 -2 5 -10 2688.19 869.676 5
 2 -5 10 2635.17 698.18 4
 -2 5 -11 1635.91 663.957 5
 2 5 11 967.383 358.012 5
 2 -5 11 1258.87 501.625 4
 -2 5 -12 650.359 410.792 5
 2 -5 12 695.39 383.787 4
 -2 5 -13 441.762 429.149 5
 2 -5 13 642.11 357.106 4
 -2 5 -14 1442.15 658.188 5
 2 -5 14 2306.9 691.202 4
 -2 5 -15 691.339 393.387 5
 2 -5 15 1518.53 578.903 4
 -2 5 -16 405.606 231.691 5
 2 -5 16 -57.4908 97.1509 4
 -2 5 -17 -831.009 471.282 5
 2 -5 17 212.3 258.94 4
 -2 5 -18 1319.19 556.95 5
 2 -5 18 1401.8 565.019 4
 2 -5 19 62.0105 151.206 4
 -2 5 -19 -298.336 284.121 5
 -2 5 -20 427.886 307.475 5
 2 -5 20 335.518 285.041 4
 -2 5 -21 -130.604 272.242 5
 2 5 22 158.381 225.116 3
 2 5 23 1166.31 438.499 3
 2 6 -17 -0.63057 181.266 5
 -2 -6 17 -40.3635 133.317 4
 2 6 -16 665.448 422.499 5
 -2 -6 16 329.655 322.623 4
 2 6 -15 240.18 252.427 5
 -2 -6 15 79.1093 180.37 4
 2 6 -14 246.27 261.499 5
 -2 -6 14 10.9612 130.878 4
 2 6 -13 775.593 411.341 5
 -2 6 13 1199.41 473.492 1
 -2 6 13 757.464 421.207 5
 -2 -6 13 359.095 310.249 4
 2 6 -12 3.61989 94.568 5
 -2 6 12 -75.6584 264.167 5
 -2 -6 12 -107.176 172.826 4
 -2 -6 11 173.213 188.685 4
 2 6 -11 678.834 407.296 5
 -2 6 11 207.05 160.624 5
 -2 6 10 500.337 340.17 5
 2 6 -10 322.699 266.388 5
 -2 -6 10 370.44 326.129 4
 2 6 -9 102.031 261.417 5
 -2 6 9 376.244 287.155 5
 -2 -6 9 384.504 278.764 4
 2 6 -8 193.785 198.805 5
 -2 6 8 633.96 479.915 5
 -2 -6 8 -112.493 217.91 4
 2 6 -7 -161.116 212.319 5
 -2 6 7 -46.9569 141.738 5
 -2 -6 7 0.49837 186.579 4
 -2 6 6 105.236 139.804 5
 2 6 -6 -11.4389 212.917 5
 -2 -6 6 -341.526 265.511 4
 2 6 -5 -92.5103 182.287 5
 -2 6 5 -98.923 294.916 5
 -2 -6 5 62.757 132.457 4
 2 6 -4 102.448 133.018 5
 -2 6 4 97.5523 213.391 5
 2 -6 -4 -68.393 211.704 4
 -2 -6 4 200.772 266.377 4
 2 6 -3 1148.29 515.502 5
 -2 6 3 2045.08 813.244 5
 2 -6 -3 1641.28 522.108 4
 -2 -6 3 1216.22 497.776 4
 2 6 -2 4289.87 975.454 5
 -2 -6 2 4093.15 874.941 4
 2 -6 -2 3498.23 763.741 4
 -2 6 2 3082.8 1021.69 5
 -2 -6 1 11973.8 1494.74 4
 2 -6 -1 12377.7 1462.4 4
 2 6 -1 9947.12 1485.43 5
 -2 6 1 13904 2154.03 5
 -2 6 0 1984.86 841.403 5
 -2 -6 0 2764.88 737.746 4
 2 6 0 2156.7 676.601 5
 2 -6 0 1968.51 727.388 4
 2 6 1 335.379 222.809 5
 -2 6 -1 798.89 603.74 5
 2 -6 1 658.792 354.662 4
 -2 6 -2 2472.25 924.928 5
 2 -6 2 1884.36 595.36 4
 2 6 2 2139.86 661.429 5
 2 6 3 1713.26 577.389 5
 -2 6 -3 2029.22 819.834 5
 2 -6 3 2753.09 724.372 4
 2 6 4 221.967 228.236 5
 -2 6 -4 185.295 177.906 5
 2 -6 4 12.8257 147.868 4
 2 6 5 1218.23 510.123 5
 -2 6 -5 1795.56 776.429 5
 2 -6 5 923.883 481.878 4
 2 6 6 4039.34 882.661 5
 -2 6 -6 6181.95 1450.1 5
 2 -6 6 4085.57 914.728 4
 2 6 7 179.808 188.948 5
 2 -6 7 213.719 186.85 4
 2 6 8 37.334 62.1882 5
 -2 6 -8 -31.9898 189.521 5
 2 -6 8 71.2261 202.412 4
 2 6 9 -59.0702 146.829 5
 -2 6 -9 550.453 374.835 5
 2 -6 9 371.091 301.266 4
 -2 6 -10 136.338 168.156 5
 2 -6 10 283.236 225.556 4
 -2 6 -11 315.32 317.323 5
 2 -6 11 -90.1796 150.276 4
 -2 6 -12 241.226 301.224 5
 2 -6 12 521.089 339.371 4
 -2 6 -13 4.89485 320.698 5
 2 -6 13 80.046 219.759 4
 -2 6 -14 217.737 260.051 5
 2 -6 14 746.72 455.563 4
 -2 6 -15 465.068 491.736 5
 2 -6 15 -86.9468 172.372 4
 -2 6 -16 -172.092 396.862 5
 2 -6 16 1760.45 680.654 4
 -2 6 -17 1023.19 618.203 5
 -2 6 -18 -226.966 283.121 5
 -2 7 11 -357.511 364.801 5
 -2 7 10 -720.108 507.139 5
 -2 7 9 -87.5816 193.915 5
 -2 7 8 102.365 185.039 5
 2 7 -7 1284.86 614.555 5
 -2 7 7 703.732 507.777 5
 -2 -7 7 960.321 494.875 4
 2 7 -6 1049.67 532.518 5
 -2 -7 6 527.106 366.219 4
 2 7 -5 492.39 383.568 5
 -2 7 5 519.515 436.738 5
 -2 -7 5 327.824 268.168 4
 -2 7 4 -53.3923 288.927 5
 2 7 -4 465.958 384.978 5
 -2 -7 4 340.254 385.856 4
 2 -7 -3 2303.85 692.156 4
 2 7 -3 1568.61 644.896 5
 -2 7 3 3162.17 1080.18 5
 -2 -7 3 2394.71 727.566 4
 -2 7 2 1697.98 811.682 5
 2 -7 -2 945.439 444.548 4
 -2 -7 2 935.52 463.847 4
 2 7 -1 260.868 254.229 5
 -2 7 1 106.741 250.945 5
 -2 -7 1 452.754 331.08 4
 2 -7 -1 643.346 367.707 4
 2 7 0 760.311 470.631 5
 -2 7 0 1298.73 700.005 5
 2 -7 0 1076.49 480.284 4
 2 7 1 430.83 358.818 5
 -2 7 -1 568.38 484.357 5
 2 -7 1 974.668 461.073 4
 2 7 2 -52.2379 118.059 5
 -2 7 -2 -60.1781 394.255 5
 2 -7 2 -40.3309 114.219 4
 2 7 3 427.51 331.463 5
 -2 7 -3 105.76 238.551 5
 2 -7 3 540.497 392.791 4
 2 7 4 404.517 315.294 5
 2 -7 4 256.154 256.735 4
 2 7 5 -141.501 196.44 5
 -2 7 -5 12.4786 154.224 5
 2 -7 5 -416.461 319.488 4
 2 7 6 110.82 106.061 5
 -2 7 -6 -237.325 333.74 5
 2 -7 6 169.164 109.069 4
 2 7 7 322.168 334.689 5
 2 -7 7 17.7571 106.954 4
 2 -7 8 349.831 169.788 4
 2 -7 9 173.199 223.643 4
 3 0 -31 58.3488 158.122 2
 3 0 -30 660.029 320.754 2
 3 0 -29 43.3362 115.663 2
 3 0 -28 2041.2 504.155 2
 3 0 -27 58.104 119.031 2
 -3 0 26 54417.4 2549.26 4
 3 0 -26 55970 2378.11 2
 -3 0 25 271.776 255.016 4
 3 0 -25 171.671 190.31 2
 -3 0 24 3028.29 561.474 4
 3 0 -24 2748.03 484.071 2
 -3 0 23 110.026 113.768 4
 3 0 -23 115.794 109.66 2
 -3 0 22 3149.81 539.23 4
 3 0 -22 3971.15 530.1 2
 -3 0 21 69.0027 117.588 4
 3 0 -21 486.768 216.968 2
 -3 0 20 19312.6 1255.86 4
 3 0 -20 23042 1170.56 2
 -3 0 19 22.4242 79.6565 4
 3 0 -19 433.971 187.314 2
 -3 0 18 19957.7 1189.17 4
 3 0 -18 22504.3 1072.01 2
 -3 0 17 114.123 110.621 4
 -3 0 16 143.893 83.6031 4
 -3 0 15 3.04613 35.4739 4
 -3 0 14 6557.46 577.568 4
 -3 0 13 57.1482 91.6569 4
 -3 0 12 5028.75 473.615 4
 -3 0 11 -10.1791 44.7025 4
 -3 0 11 -111.809 142.326 1
 -3 0 10 91.3468 67.3663 4
 -3 0 10 -18.3286 82.3466 1
 -3 0 9 -55.8331 73.5781 1
 -3 0 9 -2.68651 29.4176 4
 -3 0 8 99946.5 1716.83 4
 -3 0 8 100016 1807.77 1
 -3 0 7 40.822 57.4309 1
 -3 0 7 2.13404 36.308 4
 -3 0 6 86079.7 1326.81 4
 3 0 -6 85203 1142.06 4
 -3 0 6 83886.5 1521.69 1
 3 0 -5 -0.48222 19.3635 4
 -3 0 5 -24.6204 26.1912 4
 -3 0 5 10.116 57.5706 1
 -3 0 4 22104.9 717.282 1
 3 0 -4 22792.6 661.053 4
 -3 0 3 99.9497 73.7033 1
 3 0 -3 22.6578 32.1429 4
 -3 0 2 110026 1483.24 1
 -3 0 1 55.8583 50.6094 1
 -3 0 0 32687.6 760.854 1
 -3 0 -1 64.3183 53.4376 1
 -3 0 -2 33439.8 735.941 1
 3 0 2 34876.4 554.392 2
 3 0 3 15.3017 14.5446 2
 -3 0 -3 1.30838 45.4763 1
 -3 0 -4 5645.54 296.987 1
 -3 0 -5 99.9704 57.7445 1
 3 0 6 83870.4 1605.11 1
 -3 0 -6 89844 1141.01 1
 -3 0 -7 222.511 74.8832 1
 3 0 7 -8.89929 32.9906 1
 -3 0 -8 109649 1248.38 1
 3 0 9 134.613 88.1523 3
 -3 0 -9 117.787 61.012 1
 -3 0 -10 1478.41 142.007 1
 3 0 10 1681.79 340.71 3
 3 0 11 -104.221 123.534 3
 -3 0 -11 83.4419 44.1287 1
 3 0 12 4607.92 613.593 3
 -3 0 -12 4239.41 230.777 1
 -3 0 -13 21.9047 21.9457 2
 -3 0 -13 57.9262 40.5854 1
 -3 0 -13 30.896 53.7958 5
 3 0 13 31.8249 86.8946 3
 -3 0 -14 1467.19 238.891 5
 3 0 14 1164.91 317.323 3
 -3 0 -14 1236.66 121.815 1
 -3 0 -14 949.418 149.452 2
 -3 0 -15 37.3903 40.7545 2
 -3 0 -15 -6.70279 27.6127 5
 -3 0 -15 -5.61132 15.081 1
 3 0 15 -91.46 119.144 3
 3 0 16 146.918 132.452 3
 -3 0 -16 181.47 76.0874 2
 3 0 17 -80.6959 60.5421 3
 3 0 18 3335.47 644.866 3
 3 0 19 -30.3436 198.322 3
 3 0 20 997.566 347.938 3
 3 0 21 -111.75 162.655 3
 3 0 22 4375.13 806.189 3
 3 0 23 -32.4074 154.317 3
 3 0 24 1278.79 454.021 3
 3 0 25 89.8711 189.603 3
 3 0 26 236.319 190.751 3
 3 0 27 15.2593 121.68 3
 3 0 28 1177.92 502.111 3
 3 -1 -31 -254.128 262.633 2
 3 1 -31 175.773 151.807 2
 3 -1 -30 32.8977 75.4695 2
 3 1 -30 79.7542 104.599 2
 3 -1 -29 189.485 210.937 2
 3 1 -29 576.409 264.996 2
 3 -1 -28 2119.56 582.212 2
 -3 -1 28 1842.49 543.279 4
 3 1 -28 2555.55 472.397 2
 -3 -1 27 587.226 326.129 4
 3 -1 -27 34.83 136.131 2
 -3 1 27 47.6404 123.72 3
 3 1 -27 421.33 217.985 2
 -3 -1 26 3680.08 733.321 4
 -3 1 26 3648.14 750.364 3
 3 -1 -26 4297.2 773.288 2
 -3 1 25 8858.93 1135.93 3
 -3 -1 25 7576.61 1022.88 4
 3 -1 -25 9587.72 1118.06 2
 -3 -1 24 488.76 257.997 4
 3 -1 -24 533.089 261.164 2
 -3 1 24 752.75 317.712 3
 -3 1 23 297.364 201.8 3
 -3 -1 23 -30.7641 182.404 4
 3 -1 -23 -7.1826 76.4017 2
 -3 -1 22 77.2965 100.788 4
 3 -1 -22 166.649 145.166 2
 -3 1 22 324.258 216.151 3
 -3 -1 21 4006.75 666.071 4
 -3 1 21 3124.95 596.73 3
 3 -1 -21 4037.25 647.955 2
 3 -1 -20 3045.03 537.934 2
 -3 -1 20 2843.09 550.637 4
 -3 1 20 2739.92 540.548 3
 -3 -1 19 2826.93 538.517 4
 -3 1 19 2716.85 513.286 3
 3 -1 -19 3483.59 566.834 2
 3 1 -19 2628.89 389.121 5
 3 -1 -18 125.836 150.941 2
 -3 -1 18 52.3645 82.572 4
 -3 1 18 -19.5754 90.0471 3
 3 1 -18 35.2263 52.3947 5
 3 -1 -17 65.1925 93.1333 2
 -3 -1 17 24.7675 68.4555 4
 -3 1 17 -17.2692 61.381 3
 -3 1 17 -121.469 141.78 1
 3 1 -17 22.8491 66.7379 5
 -3 -1 16 120.718 119.518 4
 -3 1 16 0.93472 62.8958 3
 3 1 -16 153.719 112.962 5
 -3 1 16 -5.83229 67.4746 1
 3 -1 -16 125.926 136.482 2
 -3 1 15 4239.89 544.67 3
 -3 -1 15 4042.55 580.079 4
 3 -1 -15 3931.85 517.899 2
 -3 1 15 4556.85 413.609 1
 3 1 -15 4336.33 487.704 5
 3 1 -14 39918.8 1468.34 5
 -3 1 14 41783.4 1655.58 3
 -3 1 14 41035.3 1171.29 1
 -3 -1 14 39594.7 1758.52 4
 3 -1 -14 40256.9 1601.12 2
 -3 1 13 45856.5 1647.54 3
 3 1 -13 47036.7 1590.54 5
 -3 -1 13 46405.4 1852.11 4
 -3 1 13 46963.6 1191.32 1
 3 -1 -13 47057.9 1676.22 2
 3 1 -12 545.423 179.453 5
 -3 1 12 504.877 121.175 1
 -3 1 12 329.166 148.654 3
 -3 -1 12 558.434 220.404 4
 3 -1 -12 626.758 199.958 2
 -3 1 11 41.1631 26.4957 3
 3 1 -11 56.5648 107.591 5
 -3 1 11 127.617 76.6071 1
 -3 -1 11 25.9229 62.8757 4
 3 -1 -11 162.11 115.255 2
 3 1 -10 9706.53 705.552 5
 -3 -1 10 11410.6 847.108 4
 3 -1 -10 11047.6 762.584 2
 -3 1 10 11036.3 512.692 1
 3 -1 -9 2215.93 245.815 3
 -3 -1 9 2681.22 400.498 4
 -3 1 9 2537.65 241.789 1
 3 1 -9 2760.97 378.112 5
 3 -1 -9 2591.35 367.912 2
 -3 -1 8 28259.8 1272.91 4
 3 -1 -8 28722.7 810.135 3
 3 1 -8 29835.8 1201.48 5
 -3 1 8 29371.4 799.175 1
 3 -1 -8 29400.4 1186.44 2
 -3 1 7 4381.13 318.797 1
 3 1 -7 4413.21 467.744 5
 3 -1 -7 4321.41 276.304 3
 -3 -1 7 4303.43 487.558 4
 3 -1 -7 3929.05 433.501 2
 3 1 -6 110214 2210.15 5
 -3 -1 6 109390 2362.24 4
 3 -1 -6 108601 2204.9 2
 -3 1 6 106655 1549.5 1
 3 -1 -6 107667 1198.17 3
 3 -1 -5 138316 1141.85 3
 -3 -1 5 142882 2629.08 4
 3 1 -5 145477 2506.17 5
 3 -1 -5 140292 2471.5 2
 -3 1 5 145047 1806.52 1
 3 1 -4 105110 2095.46 5
 -3 1 4 108131 1611.6 1
 -3 -1 4 104501 2194.45 4
 3 1 -4 104456 2326.15 4
 3 -1 -4 106987 2116.92 2
 3 1 -3 177520 2634.7 5
 -3 1 3 172427 2107.48 1
 3 1 -3 173322 2982.69 4
 3 -1 -3 174263 1509.74 4
 3 -1 -3 176314 2678.41 2
 -3 -1 3 174950 2754.79 4
 3 1 -2 5452.74 462.809 5
 -3 1 2 5339.35 377.053 1
 3 -1 -2 5550.63 319.273 4
 3 -1 -2 5238.63 463.2 2
 3 1 -1 23623 921.545 5
 -3 1 1 23949.7 822.472 1
 3 -1 -1 22340.1 509.117 3
 3 -1 -1 22704.2 695.582 4
 3 -1 -1 22815.9 959.542 2
 3 -1 0 98240.4 1257.73 3
 -3 1 0 99013.6 1744.37 1
 3 1 0 97644.5 1810.55 5
 -3 1 0 95195.2 1551.82 2
 3 -1 0 100110 1964.04 2
 -3 1 -1 17173.3 747.753 1
 3 1 1 17010.6 719.524 5
 3 -1 1 15050.5 560.555 3
 -3 1 -1 15656.3 633.037 2
 -3 1 -2 35.2239 42.0358 1
 3 1 2 137.203 70.3141 5
 3 -1 2 16.9365 28.1361 3
 -3 1 -2 21.1645 16.341 2
 -3 1 -3 1330.55 215.542 1
 3 -1 3 1454.23 210.161 3
 3 1 3 1486.83 193.462 5
 -3 1 -3 1338.73 187.795 2
 3 -1 4 23283.3 904.265 3
 -3 1 -4 22870.3 914.506 1
 -3 -1 -4 21833.8 961.768 5
 -3 1 -4 21386.2 751.658 2
 -3 1 -5 29.4782 67.6211 1
 3 -1 5 49.3312 56.8068 3
 -3 -1 -5 33.4669 46.6181 5
 -3 -1 -6 4912.63 443.536 5
 -3 1 -6 5187.1 442.745 1
 3 -1 6 5372.72 499.369 3
 3 1 6 5352.52 288.157 1
 -3 1 -7 296.895 120.463 1
 -3 -1 -7 75.0441 33.869 5
 3 -1 7 269.444 145.433 3
 3 1 7 117.251 50.9359 1
 -3 -1 -8 35464.1 1134.41 5
 3 -1 8 36258.2 1429.27 3
 -3 1 -8 35824.1 1182.71 1
 3 1 8 36011.3 695.186 1
 3 1 8 35927.7 799.601 2
 -3 1 -9 46498.1 1346.11 1
 3 -1 9 47702.4 1713.18 3
 3 1 9 44627.7 789.478 1
 -3 -1 -9 45148 1240.4 5
 3 1 9 45748.5 788.883 2
 -3 -1 -10 1504.97 211.12 5
 -3 1 -10 1837.09 271.058 1
 3 -1 10 1479.39 314.137 3
 3 1 10 1553.84 155.642 1
 3 1 10 1611.37 129.492 2
 3 -1 11 14240.9 1021.53 3
 -3 -1 -11 14549.5 617.029 5
 -3 1 -11 14077.8 738.252 1
 3 1 11 13721.6 503.234 1
 3 1 12 -37.8503 42.7647 1
 3 -1 12 10.6642 58.5268 3
 -3 1 -12 -60.8172 80.3085 1
 -3 1 -13 2545.37 307.967 1
 3 -1 13 2519.97 458.584 3
 -3 1 -13 1918.63 405.091 5
 -3 1 -14 11210 988.488 5
 3 -1 14 13463.1 1105.07 3
 3 1 14 13090.2 1104.45 3
 -3 1 -14 12421.5 676.606 1
 -3 1 -15 29028.1 1023.07 1
 -3 1 -15 26986.4 1517.08 5
 3 1 15 31031.4 1759.66 3
 3 -1 15 29334.7 1686.54 3
 3 -1 16 4189.96 668.908 3
 -3 1 -16 4539.91 398.123 1
 3 1 16 4384.43 672.547 3
 -3 1 -16 4151.29 597.894 5
 -3 1 -17 5748.8 673.645 5
 3 1 17 5734.93 793.345 3
 -3 1 -17 5623.19 424.501 1
 3 -1 17 5156.35 753.607 3
 3 -1 18 346.404 205.556 3
 3 1 18 321.297 244.462 3
 3 -1 19 1597.02 450.806 3
 3 1 19 1488.18 432.949 3
 3 -1 20 21.5592 187.487 3
 3 1 20 68.4938 147.837 3
 3 1 21 7322.53 1001.14 3
 3 -1 21 7024.8 1006.95 3
 3 -1 22 1219.49 455.786 3
 3 1 22 696.421 307.75 3
 3 -1 23 348.487 254.155 3
 3 1 23 300.17 218.818 3
 3 1 24 181.578 205.552 3
 3 -1 24 -107.666 159.393 3
 3 -1 25 -79.4783 100.033 3
 3 1 25 -38.0838 122.096 3
 3 -1 26 100.171 126.5 3
 3 1 26 -63.5147 74.9277 3
 3 -1 27 1272.15 504.206 3
 3 1 27 1074.41 451.385 3
 3 -2 -30 63.7585 144.287 2
 3 -2 -29 50.1103 168.729 2
 -3 -2 29 114.019 192.333 4
 3 -2 -28 -232.431 232.338 2
 -3 -2 28 56.9915 141.801 4
 3 -2 -27 509.613 300.452 2
 -3 -2 27 371.481 255.407 4
 3 -2 -26 -64.2037 219.049 2
 -3 -2 26 203.977 125.254 4
 -3 2 25 29.0108 80.3679 3
 3 -2 -25 -67.1487 230.995 2
 -3 -2 25 -43.758 127.401 4
 3 2 -24 1700.34 379.268 5
 -3 2 24 1247.39 392.751 3
 3 -2 -24 1594.98 504.787 2
 -3 -2 24 1960.62 570.772 4
 -3 2 23 6853.32 913.376 3
 -3 -2 23 6902.82 1023.02 4
 3 -2 -23 6362.7 977.124 2
 3 2 -23 6415.62 733.26 5
 3 2 -22 3502.06 548.264 5
 3 -2 -22 2854.67 643.128 2
 -3 2 22 3660.98 646.852 3
 -3 -2 22 2792.09 646.065 4
 3 -2 -21 -136.583 173.14 2
 -3 2 21 38.9081 131.406 3
 3 2 -21 119.588 142.853 5
 -3 -2 21 -165.533 162 4
 3 2 -20 76.0495 109.584 5
 -3 2 20 36.8128 74.3753 3
 3 -2 -20 -89.256 136.951 2
 -3 -2 20 39.4335 202.76 4
 -3 2 19 50.1328 74.4996 1
 -3 2 19 45.8253 75.0713 3
 3 2 -19 88.826 109.066 5
 -3 -2 19 -35.5347 157.362 4
 3 2 -18 249.153 191.319 5
 -3 2 18 54.0804 97.228 3
 -3 2 18 24.824 90.3669 1
 3 -2 -18 -12.4792 81.9943 2
 -3 -2 18 -301.42 197.196 4
 3 2 -17 5094.21 673.008 5
 -3 2 17 5207.62 622.03 3
 -3 -2 17 4663.4 737.467 4
 -3 2 17 5143.36 406.649 1
 3 -2 -17 5283.81 772.656 2
 3 -2 -16 1250.54 366.927 2
 -3 2 16 1500.2 311.788 3
 3 2 -16 1920.4 410.156 5
 -3 2 16 1748.02 228.079 1
 -3 -2 16 1400.44 403.861 4
 -3 2 15 316.945 102.275 1
 -3 2 15 177.197 131.216 3
 3 -2 -15 102.989 126.772 2
 3 2 -15 285.067 151.64 5
 -3 -2 15 72.1306 143.737 4
 3 -2 -14 617.33 267.968 2
 3 2 -14 419.262 189.37 5
 -3 2 14 683.704 188.176 3
 -3 2 14 1005.38 171.78 1
 -3 -2 14 573.416 262.923 4
 -3 2 13 1912.08 306.624 3
 3 -2 -13 1959.15 436.279 2
 -3 2 13 1439.84 205.995 1
 -3 -2 13 1735.35 424.027 4
 3 2 -13 1544.3 375.641 5
 3 2 -12 5056.73 668.636 5
 -3 -2 12 4949.84 691.88 4
 -3 2 12 5901.44 495.881 3
 -3 2 12 6016.95 417.02 1
 3 -2 -12 5385.77 707.106 2
 3 2 -11 741.183 274.425 5
 3 -2 -11 938.42 278.58 2
 -3 2 11 525.108 144.466 3
 -3 2 11 622.949 132.04 1
 -3 2 11 1044.38 249.06 4
 -3 -2 11 859.363 292.66 4
 -3 2 10 53.0712 44.5254 3
 -3 2 10 -18.4373 66.4686 1
 3 -2 -10 52.8324 92.9064 2
 3 2 -10 101.678 54.1322 5
 -3 2 10 224.979 109.447 4
 -3 -2 10 -60.6339 83.4279 4
 3 2 -9 27024.7 1520.81 5
 -3 2 9 26937.3 822.346 3
 -3 2 9 26328.7 1093.6 4
 -3 2 9 25421 945.252 1
 -3 -2 9 26656.9 1532.36 4
 3 -2 -9 25955 1494.04 2
 3 2 -8 16096.3 1153.1 5
 -3 2 8 17417.9 579.115 3
 -3 2 8 16727.3 800.297 1
 -3 2 8 16662.4 809.42 4
 -3 -2 8 18203.5 1251.12 4
 3 -2 -8 16807.9 1177.46 2
 3 2 -7 2090.23 401.531 5
 -3 2 7 2335.33 178.864 3
 -3 2 7 2577.53 330.215 1
 -3 2 7 2303.88 292.406 4
 -3 -2 7 1953.59 406.194 4
 3 -2 -7 2485.05 456.273 2
 -3 -2 6 78130.4 2513.3 4
 -3 2 6 78067.2 1878.23 1
 -3 2 6 79381.9 1689.03 4
 3 2 -6 78077.3 2508.64 5
 -3 2 5 53813.8 1613.7 1
 3 -2 -5 56975.5 1372.91 4
 -3 -2 5 55719.5 2078.76 4
 -3 2 5 55433.9 1427.3 4
 3 2 -5 55010.2 2058.73 5
 -3 2 4 8713.77 664.275 1
 3 -2 -4 8492.69 559.17 4
 -3 -2 4 7859.71 763.092 4
 -3 2 4 7851.31 533.915 4
 3 2 -4 8327.64 784.669 5
 -3 2 3 61.8609 46.2736 4
 3 2 -3 16.1838 91.8084 5
 -3 -2 3 191.841 153.102 4
 3 -2 -3 27.8291 25.2664 4
 -3 2 3 45.5325 55.2415 1
 -3 -2 2 76878.1 2340.73 4
 -3 2 2 72811.4 827.586 3
 -3 2 2 77113.8 2084.58 1
 3 -2 -2 76164 1852.99 4
 -3 2 2 74191.1 1599.66 4
 3 2 -2 77532.1 2356.11 5
 3 2 -1 54893.6 1927.82 5
 -3 2 1 54710 891.235 3
 -3 2 1 53988.7 1789.45 1
 -3 -2 1 54882.7 1956.3 4
 3 -2 -1 52384.8 1586.85 4
 -3 2 1 52432.4 1354.96 4
 3 2 0 12048.6 886.843 5
 -3 2 0 12307.2 874.052 1
 -3 2 0 13500.4 515.108 3
 3 -2 0 12987.8 814.899 4
 3 2 1 3773.86 491.251 5
 -3 2 -1 3726.97 302.185 3
 3 -2 1 4014.63 471.08 4
 3 2 2 32299.7 1378.96 5
 -3 2 -2 31795.9 979.979 3
 3 -2 2 33038.8 1389.89 4
 3 2 3 2725.33 394.593 5
 3 -2 3 2793.83 347.149 3
 3 -2 3 2801.44 414.972 4
 3 2 4 36948.1 1391.77 5
 3 -2 4 41730.3 1631.58 4
 3 -2 4 38730.3 1358.53 3
 3 -2 5 10329.7 740.797 3
 3 2 5 11223.6 726.011 5
 3 -2 5 10924.2 850.895 4
 3 2 6 51252.9 1485.93 5
 3 -2 6 50230.7 1866.55 4
 3 -2 6 51407.7 1733.66 3
 3 -2 7 353.991 166.164 4
 3 -2 7 493.052 193.757 3
 3 2 7 507.339 148.68 5
 3 2 8 27133.9 951.115 5
 3 -2 8 28863.2 1407.64 3
 3 -2 8 27739.1 1448.77 4
 3 -2 9 12341.7 959.798 3
 3 2 9 12446.1 584.038 5
 3 -2 9 11970.4 979.789 4
 -3 -2 -9 13234.6 953.758 5
 3 -2 10 1747.09 395.525 4
 3 -2 10 1567.29 354.51 3
 -3 -2 -10 1466.57 303.757 5
 3 2 10 1450.2 178.653 5
 3 -2 11 936.924 295.998 4
 -3 2 -11 727.131 282.86 5
 3 -2 11 639.589 235.514 3
 3 2 11 745.846 118.256 1
 -3 -2 -11 661.969 186.646 5
 3 -2 12 339.706 153.791 4
 3 -2 12 35.9959 91.6206 3
 -3 2 -12 8.64979 118.596 5
 -3 2 -13 2021.95 516.099 5
 3 -2 13 1903.29 430.664 4
 3 -2 13 1766.9 432.799 3
 -3 2 -14 6249.82 900.783 5
 3 -2 14 5846.5 788.962 3
 3 -2 14 6346.77 813.344 4
 -3 2 -15 52883.6 2631.48 5
 3 -2 15 51704.5 2358.72 4
 3 -2 15 53567.2 2456.66 3
 3 -2 16 62674.3 2737.49 3
 -3 2 -16 60022 2801.18 5
 3 -2 16 61032.4 2624.74 4
 3 -2 17 215.698 215.542 4
 3 -2 17 234.554 201.754 3
 -3 2 -17 132.622 190.318 5
 3 -2 18 513.372 298.563 4
 3 -2 18 562.149 328.82 3
 -3 2 -18 200.855 121.819 5
 3 2 18 431.368 234.672 3
 3 -2 19 9587.62 1167.5 3
 3 2 19 10640.2 1178.01 3
 3 -2 19 9826.01 1134.22 4
 3 -2 20 1739.41 493.733 4
 3 2 20 1698.73 480.148 3
 3 -2 20 1775.05 509.674 3
 3 -2 21 3618.01 725.289 4
 3 -2 21 4842.43 860.578 3
 3 2 21 4668.74 811.955 3
 3 -2 22 1935.38 545.619 4
 3 -2 22 1720.2 547.319 3
 3 2 22 1773.26 517.016 3
 3 -2 23 338.001 241.395 4
 3 -2 23 299.482 220.318 3
 3 2 23 442.659 274.396 3
 3 -2 24 88.7127 127.607 4
 3 -2 24 102.384 170.595 3
 3 2 24 45.758 137.258 3
 3 -2 25 -92.0665 145.119 3
 3 -2 25 41.5201 129.485 4
 3 2 25 206.596 233.233 3
 3 -2 26 -130.898 162.81 4
 3 -2 26 164.648 205.11 3
 3 2 26 -8.38259 76.2327 3
 3 2 27 -97.5362 211.14 3
 -3 -3 29 5146.59 1238.02 4
 -3 -3 28 498.36 336.889 4
 -3 -3 27 6.7371 98.9029 4
 -3 -3 26 236.008 222.364 4
 3 3 -25 128.927 166.876 5
 -3 -3 25 469.688 291.771 4
 3 3 -24 191.138 152.712 5
 -3 -3 24 599.958 366.066 4
 3 3 -23 320.039 211.232 5
 -3 -3 23 12.0115 132.879 4
 3 3 -22 2062.98 509.287 5
 -3 -3 22 1995.32 602.96 4
 3 3 -21 1266.46 421.771 5
 -3 -3 21 1773.17 584.153 4
 3 3 -20 2071.92 540.955 5
 -3 -3 20 1541.09 483.91 4
 3 3 -19 139.385 175.883 5
 -3 -3 19 82.8958 177.039 4
 3 3 -18 4683.63 782.106 5
 -3 3 18 4216.22 575.212 3
 -3 3 18 4364.52 379.517 1
 -3 -3 18 3607 749.018 4
 -3 3 17 1257.16 299.568 3
 -3 3 17 1483 225.111 1
 3 3 -17 1175.59 391.336 5
 -3 -3 17 1718.35 506.89 4
 3 3 -16 -85.9539 142.3 5
 -3 3 16 -4.20636 49.8891 3
 -3 3 16 31.9907 49.7383 1
 -3 -3 16 -65.0381 152.551 4
 -3 3 15 3886.21 476.825 3
 3 3 -15 3434.97 675.516 5
 -3 3 15 4167.96 397.186 1
 -3 -3 15 4900.01 833.789 4
 3 3 -14 891.616 312.004 5
 -3 3 14 1369.48 235.233 1
 -3 3 14 1250.92 259.196 3
 -3 -3 14 1221.53 388.288 4
 3 3 -13 2134.93 511.185 5
 -3 3 13 3264.45 394.891 3
 -3 3 13 2952.94 355.106 1
 -3 -3 13 3071.54 644.026 4
 3 3 -12 384.596 240.641 5
 -3 3 12 266.311 127.054 1
 -3 3 12 276.074 102.828 3
 -3 -3 12 643.762 303.969 4
 3 3 -11 15076.2 1403.36 5
 -3 3 11 14733 729.458 3
 -3 3 11 14813 892.955 1
 -3 -3 11 13818.6 1303.31 4
 3 3 -10 5433.2 837.559 5
 -3 3 10 4960.64 397.542 3
 -3 3 10 5644.41 571.071 1
 -3 -3 10 5426.95 827.666 4
 -3 3 9 2994.42 293.387 3
 -3 3 9 5860.26 621.577 1
 -3 -3 9 4046.35 718.966 4
 3 3 -9 3716.82 728.873 5
 3 3 -8 158.331 146.126 5
 -3 -3 8 155.066 107.65 4
 -3 3 8 83.8491 97.2546 1
 -3 3 7 5159.5 598.569 1
 -3 -3 7 4489.72 726.848 4
 3 3 -7 4330.88 701.147 5
 -3 -3 6 3783.53 696.211 4
 3 3 -6 4801.49 806.433 5
 3 3 -5 4355.71 720.606 5
 -3 3 5 3588.48 523.099 1
 3 -3 -5 3630.23 481.27 4
 -3 -3 5 3636.69 629.213 4
 3 3 -4 3641.76 645.562 5
 3 -3 -4 3802.41 502.822 4
 -3 -3 4 3376.7 589.768 4
 3 3 -3 1362.27 427.676 5
 -3 -3 3 1396.01 403.456 4
 3 -3 -3 1251.63 301.481 4
 -3 3 2 1404.3 213.403 3
 3 3 -2 1590.27 416.089 5
 -3 -3 2 1340.95 383.979 4
 3 -3 -2 1591.08 341.14 4
 -3 3 1 148.58 61.1871 3
 3 -3 -1 198.277 140.423 4
 -3 -3 1 249.852 185.681 4
 3 3 -1 303.331 172.229 5
 3 3 0 602.024 268.604 5
 -3 3 0 588.093 154.71 3
 3 -3 0 920.854 277.953 4
 3 3 1 127.409 156.402 5
 3 -3 1 -12.6741 103.999 4
 3 3 2 32085.7 1784.16 5
 3 -3 2 31475.1 1660.35 4
 3 3 3 19968.5 1385.73 5
 3 -3 3 20651 1380.93 4
 3 3 4 1969.7 420.882 5
 3 -3 4 2155.11 455.848 4
 3 3 5 43.0633 81.8166 5
 3 -3 5 194.135 193.194 4
 3 3 6 20292.4 1298.89 5
 3 -3 6 21888.8 1516.79 4
 3 3 7 2645.22 454.053 5
 3 -3 7 3265.6 586.954 4
 3 -3 8 -565.531 254.631 4
 3 3 8 -49.1078 82.0341 5
 3 -3 9 3098.32 628.61 4
 3 3 9 1410.69 323.951 5
 -3 3 -9 2153.06 697.156 5
 3 3 10 7631.34 681.835 5
 3 -3 10 8133.85 980.761 4
 -3 3 -10 7782.92 1203.32 5
 3 3 11 32999.2 1322.13 5
 -3 3 -11 34671.6 2541.44 5
 3 -3 11 31854.2 1986.65 4
 3 3 12 5335.86 489.332 5
 -3 3 -12 6187.67 1065.19 5
 3 -3 12 6771.47 933.324 4
 3 -3 13 248.627 170.693 4
 -3 3 -13 174.47 211.615 5
 3 -3 14 8896.25 1108.27 4
 -3 3 -14 10189.2 1357.89 5
 3 -3 15 2474.87 615.178 4
 -3 3 -15 1857.29 603.154 5
 3 -3 16 36.1886 86.5904 4
 -3 3 -16 -100.836 208.308 5
 -3 3 -17 11379.1 1419.53 5
 3 -3 17 8994.46 1174.15 4
 3 -3 18 1207.77 448.644 4
 -3 3 -18 1390.04 496.63 5
 -3 3 -19 6368.93 1045.7 5
 3 -3 19 7194.48 1091.32 4
 3 -3 20 1212.38 470.507 4
 3 3 20 973.575 380.858 3
 3 -3 21 1085.1 437.343 4
 3 3 21 1013.19 374.191 3
 3 -3 22 400.58 261.435 4
 3 3 22 110.637 123.607 3
 3 -3 23 514.189 312.412 4
 3 3 23 131.671 115.261 3
 3 -3 24 177.433 261.152 4
 3 3 24 -9.7931 65.7672 3
 3 -3 25 1988.69 641.494 4
 3 3 25 1258.66 467.276 3
 3 3 26 294.667 244.78 3
 -3 -4 26 58.0936 136.654 4
 3 4 -25 548.61 278.113 5
 -3 -4 25 -117.5 265.94 4
 -3 -4 24 -188.746 210.936 4
 3 4 -24 -367.608 246.876 5
 3 4 -23 -113.123 177.311 5
 -3 -4 23 105.257 175.116 4
 3 4 -22 86.0006 125.981 5
 -3 -4 22 296.705 259.369 4
 3 4 -21 1083.18 425.37 5
 -3 -4 21 1395.5 534.876 4
 -3 -4 20 293.473 213.134 4
 3 4 -20 89.736 101.885 5
 3 4 -19 -163.563 184.116 5
 -3 -4 19 96.7809 155.419 4
 3 4 -18 2783.99 691.823 5
 -3 -4 18 2069.21 617.478 4
 3 4 -17 3.37581 238.025 5
 -3 4 17 28.2708 43.5282 1
 -3 -4 17 35.2501 133.496 4
 3 4 -16 5828.85 1002.12 5
 -3 4 16 5857.63 550.876 1
 -3 -4 16 5840.62 1008.23 4
 -3 4 15 -220.348 118.334 1
 3 4 -15 -148.585 165.937 5
 -3 -4 15 5.74757 102.344 4
 -3 4 14 1744.88 346.508 1
 3 4 -14 1265.87 405.799 5
 -3 -4 14 1097 430.308 4
 -3 4 13 133.537 98.022 1
 -3 -4 13 65.9164 103.525 4
 -3 4 12 2183.88 404.686 1
 3 4 -12 1978.81 561.633 5
 -3 -4 12 2158.02 598.536 4
 3 4 -11 6508.33 1062.23 5
 -3 4 11 6991 773.689 1
 -3 -4 11 6041.41 969.248 4
 3 4 -10 2942.55 726.306 5
 -3 -4 10 2539.95 633.377 4
 -3 4 10 2756.41 494.322 1
 3 4 -9 60123 3176.59 5
 -3 4 9 65076.7 2517.74 1
 -3 -4 9 57335.1 2939.25 4
 3 4 -8 4908.42 896.173 5
 -3 4 8 6085.36 799.97 1
 -3 -4 8 5414.69 899.857 4
 3 4 -7 715.313 357.024 5
 -3 -4 7 681.724 379.879 4
 3 4 -6 188.139 145.846 5
 -3 -4 6 52.3736 137.015 4
 3 4 -5 717.099 347.808 5
 3 -4 -5 1331.01 345.26 4
 -3 -4 5 1492.87 447.437 4
 3 4 -4 1781.9 525.379 5
 3 -4 -4 1419.52 369.281 4
 -3 -4 4 1384.74 436.145 4
 3 4 -3 3071.97 671.855 5
 3 -4 -3 3816.72 610.4 4
 -3 -4 3 3690.3 705.387 4
 -3 -4 2 727.506 315.237 4
 3 4 -2 822.921 361.15 5
 3 -4 -2 1257.9 361.637 4
 3 4 -1 228.415 212.228 5
 -3 -4 1 216.725 215.277 4
 3 -4 -1 195.594 142.825 4
 3 4 0 734.097 330.126 5
 -3 -4 0 614.977 252.618 4
 3 -4 0 624.435 276.891 4
 3 4 1 7379.93 1007.52 5
 3 -4 1 7259.97 911.119 4
 3 4 2 709.875 312.694 5
 3 -4 2 983.568 346.821 4
 3 4 3 -8.51343 78.8036 5
 3 -4 3 -41.0449 140.363 4
 3 4 4 4639.07 772.056 5
 3 -4 4 4315.43 737.947 4
 3 4 5 2930.55 601.549 5
 3 -4 5 1968.57 517.397 4
 3 4 6 159.04 161.259 5
 -3 4 -6 -71.0125 313.661 5
 3 -4 6 154.043 215.41 4
 3 -4 7 -20.4076 75.075 4
 3 4 7 64.0882 124.567 5
 3 4 8 286.45 197.235 5
 -3 4 -8 468.607 314.379 5
 3 -4 8 163.878 123.694 4
 3 4 9 166.116 164.406 5
 -3 4 -9 382.759 407.934 5
 3 -4 9 51.0473 92.8779 4
 3 4 10 868.836 292 5
 -3 4 -10 1048.54 539.201 5
 3 -4 10 1272.33 471.259 4
 3 4 11 -30.6293 78.9139 5
 -3 4 -11 -68.6111 221.672 5
 3 -4 11 153.607 193.448 4
 -3 4 -12 99.7196 130.114 5
 3 -4 12 64.2056 172.06 4
 3 -4 13 7631.84 1145.6 4
 -3 4 -13 8203.95 1380.95 5
 -3 4 -14 52.1886 118.405 5
 3 -4 14 313.407 277.284 4
 3 -4 15 9114.04 1299.54 4
 -3 4 -15 9799.24 1508.35 5
 -3 4 -16 -107.374 148.455 5
 3 -4 16 251.383 217.931 4
 -3 4 -17 -28.9324 148.461 5
 3 -4 17 326.874 285.385 4
 -3 4 -18 25.3165 188.43 5
 3 -4 18 318.603 270.448 4
 -3 4 -19 -15.3133 229.088 5
 3 -4 19 163.644 319.409 4
 -3 4 -20 206.562 161.771 5
 3 -4 20 305.26 237.402 4
 3 -4 21 339.537 317.078 4
 3 -4 22 294.836 265.105 4
 3 4 22 995.46 413.2 3
 3 4 23 -77.2362 170.652 3
 3 4 24 -67.2475 170.651 3
 3 5 -23 449.391 322.364 5
 3 5 -22 3102.74 802.777 5
 -3 -5 22 2938.1 831.093 4
 3 5 -21 466.858 249.284 5
 -3 -5 21 280.473 259.148 4
 3 5 -20 16.0122 214.736 5
 -3 -5 20 263.136 254.687 4
 3 5 -19 -325.478 269.984 5
 -3 -5 19 827.041 464.91 4
 3 5 -18 -73.5317 229.185 5
 -3 -5 18 229.918 263.003 4
 3 5 -17 2024.34 628.787 5
 -3 -5 17 2458.92 735.003 4
 3 5 -16 1130.23 473.953 5
 -3 -5 16 1287.62 525.781 4
 -3 5 15 2515.93 472.823 1
 3 5 -15 1189.59 493.189 5
 -3 -5 15 2184.68 666.207 4
 -3 5 14 1982.39 446.524 1
 3 5 -14 1203.16 436.647 5
 -3 -5 14 2393.36 685.258 4
 -3 5 13 827.863 303.523 1
 3 5 -13 642.037 389.14 5
 -3 -5 13 1688.89 565.098 4
 3 5 -12 503.636 339.053 5
 -3 -5 12 290.519 297.163 4
 -3 5 12 112.859 135.465 1
 3 5 -11 1501.57 548.182 5
 -3 -5 11 1111.31 465.96 4
 -3 5 11 837.575 294.366 1
 -3 5 10 -21.4087 110.584 1
 3 5 -10 21.6875 137.213 5
 3 5 -9 2.92107 195.147 5
 -3 5 9 -85.2492 121.826 1
 -3 -5 9 -47.7536 102.131 4
 3 5 -8 1271.49 551.813 5
 -3 -5 8 827.606 420.556 4
 3 5 -7 7920.4 1257.77 5
 -3 -5 7 7600.84 1157.1 4
 3 5 -6 991.584 424.171 5
 -3 -5 6 1054.33 442.839 4
 -3 -5 5 1653.33 534.502 4
 3 5 -5 1893.31 595.615 5
 3 -5 -5 1309.89 405.131 4
 3 -5 -4 -41.07 86.4047 4
 -3 -5 4 -477.297 286.504 4
 -3 -5 3 698.227 345.229 4
 3 -5 -3 828.671 318.786 4
 3 5 -3 91.8044 167.829 5
 -3 -5 2 -75.1616 109.431 4
 3 -5 -2 0.64834 74.1293 4
 3 5 -2 35.0369 116.466 5
 3 5 -1 44.0992 172.993 5
 -3 -5 1 40.8666 122.503 4
 3 -5 -1 -59.8214 104.906 4
 3 5 0 1081.92 451.743 5
 -3 5 0 1853.37 727.152 5
 3 -5 0 1215.4 406.452 4
 -3 5 -1 1679.6 744.526 5
 3 5 1 1312.07 471.329 5
 3 -5 1 1932.61 527.979 4
 3 5 2 3288.97 742.02 5
 -3 5 -2 5188.97 1313.31 5
 3 -5 2 2629.18 620.908 4
 3 5 3 1483.96 486.503 5
 -3 5 -3 1047.03 564.899 5
 3 -5 3 1156.78 425.87 4
 -3 5 -4 -357.665 359.509 5
 3 5 4 69.9864 109.977 5
 3 -5 4 160.955 200.541 4
 -3 5 -5 811.878 539.293 5
 3 5 5 688.224 366.2 5
 3 -5 5 294.248 184.188 4
 -3 5 -6 1026.77 525.563 5
 3 5 6 729.891 325.72 5
 3 -5 6 480.762 341.112 4
 3 5 7 368.592 263.931 5
 -3 5 -7 37.666 119.409 5
 3 -5 7 59.3903 158.543 4
 3 5 8 -37.8605 146.423 5
 -3 5 -8 -368.893 358.091 5
 3 -5 8 -127.965 162.992 4
 3 5 9 469.589 273.074 5
 -3 5 -9 123.286 202.106 5
 3 -5 9 395.167 288.614 4
 3 5 10 2282.87 571.453 5
 -3 5 -10 2779.29 956.759 5
 3 -5 10 2918.66 765.377 4
 -3 5 -11 1790.61 722.677 5
 3 -5 11 1274.35 509.228 4
 -3 5 -12 655.554 490.844 5
 3 -5 12 -102.129 90.075 4
 -3 5 -13 2236.91 826.646 5
 3 -5 13 2126.71 640.982 4
 -3 5 -14 18.3371 151.189 5
 3 -5 14 436.297 279.995 4
 -3 5 -15 552.264 453.549 5
 3 -5 15 305.253 274.145 4
 -3 5 -16 135.565 150.443 5
 3 -5 16 -226.443 237.597 4
 -3 5 -17 -80.4826 267.401 5
 3 -5 17 12.5243 82.1587 4
 -3 5 -18 -164.594 255.04 5
 3 -5 18 722.045 437.325 4
 -3 5 -19 174.605 245.869 5
 3 -5 19 302.396 307.171 4
 -3 5 -20 -506.171 380.775 5
 3 6 -16 147.46 196.55 5
 -3 -6 16 559.315 381.74 4
 3 6 -15 -17.0107 101.965 5
 -3 -6 15 129.309 203.243 4
 -3 6 14 243.976 178.281 1
 -3 6 14 209.777 271.773 5
 3 6 -14 73.7346 178.565 5
 -3 -6 14 239.362 294.787 4
 3 6 -13 196.917 90.4617 5
 -3 6 13 -17.3154 128.267 5
 -3 -6 13 346.103 231.541 4
 -3 6 13 70.4629 138.215 1
 -3 6 12 195.16 380.251 5
 -3 -6 12 -260.665 224.388 4
 -3 6 12 50.1256 111.542 1
 3 6 -11 233.472 199.687 5
 -3 6 11 -71.031 92.2465 5
 -3 -6 11 144.107 203.193 4
 -3 6 11 -149.442 222.485 1
 3 6 -10 100.292 85.9449 5
 -3 6 10 -30.7213 236.653 1
 -3 6 10 -32.7543 134.035 5
 -3 -6 10 90.9953 173.717 4
 3 6 -9 218.929 88.2545 5
 -3 6 9 749.259 508.763 5
 -3 -6 9 673.038 353.641 4
 -3 6 8 2829.1 975.358 5
 3 6 -8 2709.97 785.821 5
 -3 -6 8 2215.08 674.847 4
 3 6 -7 273.357 256.009 5
 -3 6 7 -196.884 346.726 5
 -3 -6 7 -47.7046 109.532 4
 3 6 -6 283.633 250.794 5
 -3 6 6 428.811 453.748 5
 -3 -6 6 59.6983 72.7878 4
 3 6 -5 651.474 379.988 5
 -3 6 5 456.79 442.428 5
 -3 -6 5 1235.78 513.119 4
 3 6 -4 51.8524 124.893 5
 -3 6 4 248.826 327.673 5
 3 -6 -4 640.912 340.979 4
 -3 -6 4 404.341 261.362 4
 3 6 -3 251.086 202.965 5
 -3 6 3 75.8388 327.235 5
 -3 -6 3 -9.02818 111.58 4
 3 -6 -3 -127.142 146.967 4
 3 6 -2 3927.04 913.888 5
 -3 6 2 6143.2 1518.63 5
 -3 -6 2 4037.7 906.812 4
 3 -6 -2 5553.97 962.9 4
 3 6 -1 28.2296 95.302 5
 -3 6 1 36.6839 232.557 5
 3 -6 -1 179.903 225.715 4
 3 6 0 3174.93 821.897 5
 -3 6 0 3162.99 1142.05 5
 3 -6 0 3044.39 738.636 4
 3 6 1 3328.07 792.872 5
 3 -6 1 2531.09 661.071 4
 3 6 2 51.7291 196.973 5
 -3 6 -2 -737.901 555.568 5
 3 -6 2 45.8185 312.155 4
 3 6 3 897.533 428.02 5
 -3 6 -3 644.445 482.734 5
 3 -6 3 499.087 334.842 4
 3 6 4 952.95 444.278 5
 -3 6 -4 1535.24 805.354 5
 3 -6 4 872.533 415.03 4
 3 6 5 5459.2 1010.67 5
 -3 6 -5 7372.75 1718.34 5
 3 -6 5 7013.3 1174.41 4
 3 6 6 132.588 227.713 5
 -3 6 -6 138.588 257.294 5
 3 -6 6 84.8311 201.558 4
 3 6 7 839.495 400.612 5
 3 -6 7 558.316 344.801 4
 3 6 8 680.575 362.397 5
 -3 6 -8 396.405 358.238 5
 3 -6 8 745.542 479.558 4
 -3 6 -9 858.967 592.574 5
 3 -6 9 832.681 488.785 4
 -3 6 -10 269.717 375.733 5
 3 -6 10 -56.9331 165.862 4
 -3 6 -11 3061.67 1082.35 5
 3 -6 11 2199.44 707.547 4
 -3 6 -12 949.91 608.389 5
 3 -6 12 834.395 447.975 4
 -3 6 -13 -21.4376 333.023 5
 3 -6 13 -216.973 215.162 4
 -3 6 -14 1918.15 866.263 5
 3 -6 14 1494.37 615.976 4
 -3 6 -15 -14.5658 137.231 5
 3 -6 15 -3.21747 195.359 4
 -3 6 -16 -150.306 296.449 5
 -3 6 -17 607.743 462.755 5
 -3 7 12 692.471 532.65 5
 -3 7 12 -141.883 188.704 1
 -3 7 11 3.79729 372.213 5
 -3 7 11 -45.1437 103.736 1
 -3 7 10 810.589 619.596 5
 -3 7 10 258.174 309.745 1
 -3 7 9 -505.407 371.494 1
 -3 7 9 440.685 439.974 5
 -3 7 8 375.359 439.227 5
 -3 7 7 476.003 454.266 5
 3 7 -6 1082.67 528.89 5
 -3 7 6 610.072 471.608 5
 -3 7 5 120.168 260.767 5
 3 7 -5 225.686 296.378 5
 3 7 -4 11.1753 138.388 5
 -3 7 4 192.453 308.979 5
 -3 -7 4 204.519 301.776 4
 3 7 -3 1651.36 651.938 5
 -3 7 3 1075.08 632.369 5
 -3 -7 3 2756.14 824.887 4
 3 -7 -3 1462.21 534.946 4
 -3 7 2 1377.75 743.112 5
 3 7 -2 858.403 493.206 5
 3 -7 -2 1194.05 467.471 4
 3 7 -1 1075.4 476.961 5
 -3 7 1 1371.6 735.059 5
 3 -7 -1 807.56 386.474 4
 -3 7 0 439.785 465.241 5
 3 7 0 23.8911 158.965 5
 3 -7 0 440.02 284.096 4
 3 7 1 44.158 126.086 5
 -3 7 -1 -52.6997 261.191 5
 3 -7 1 530.339 339.727 4
 3 7 2 384.109 295.121 5
 -3 7 -2 -354.66 422.276 5
 3 -7 2 98.1734 161.445 4
 3 7 3 854.285 439.308 5
 -3 7 -3 36.2513 447.949 5
 3 -7 3 270.001 378.378 4
 3 7 4 -254.466 246.06 5
 3 -7 4 93.0508 168.111 4
 3 7 5 395.564 283.716 5
 3 -7 5 400.894 338.142 4
 3 7 6 205.473 218.537 5
 3 -7 6 -187.755 223.705 4
 3 -7 7 264.824 273.313 4
 3 -7 8 -14.6806 99.0829 4
 4 0 -30 135.992 129.998 2
 4 0 -29 -112.919 139.989 2
 4 0 -28 2659.98 576.532 2
 4 0 -27 369.58 230.348 2
 4 0 -26 924.611 320.381 2
 4 0 -25 101.094 149.469 2
 4 0 -24 2169.68 449.666 2
 4 0 -23 208.263 164.533 2
 -4 0 22 2953.71 531.392 4
 4 0 -22 4111.62 563.666 2
 -4 0 21 63.3863 82.4623 4
 4 0 -21 64.426 95.1132 2
 -4 0 20 9056.26 875.221 4
 4 0 -20 9099.52 773.153 2
 -4 0 19 -33.6442 34.9429 4
 4 0 -19 211.411 152.029 2
 -4 0 18 18.094 39.2782 4
 4 0 -18 241.623 130.456 2
 -4 0 17 -25.0113 59.1069 4
 -4 0 16 5285.15 583.556 4
 -4 0 15 -0.71985 45.89 4
 -4 0 14 37787.9 1454.37 4
 -4 0 13 149.668 118.353 4
 -4 0 12 1914.91 310.026 1
 -4 0 12 2854.74 368.823 4
 -4 0 11 -73.4873 117.372 1
 -4 0 11 -4.65757 21.9533 4
 -4 0 10 22433.1 886.398 4
 -4 0 10 21362.3 997.057 1
 -4 0 9 -64.0889 46.4601 4
 -4 0 9 -40.4785 54.5539 1
 -4 0 8 46663.4 1073.87 4
 -4 0 8 43591.9 1327.27 1
 4 0 -7 13.6053 23.5927 4
 -4 0 7 -36.0724 68.9925 1
 -4 0 7 -19.2555 28.6268 4
 4 0 -6 19576.6 634.053 4
 -4 0 6 19785.6 834.952 1
 4 0 -5 33.2644 34.543 4
 -4 0 5 65.5586 102.446 1
 4 0 -4 4257.92 342.527 4
 -4 0 4 4538.26 374.921 1
 -4 0 3 33.4301 120.981 1
 4 0 -3 3.44094 42.8581 4
 -4 0 2 146669 2013.8 1
 -4 0 1 83.2347 100.798 1
 -4 0 0 36713.8 962.99 1
 -4 0 -1 66.9202 70.6883 1
 4 0 1 36.6518 36.871 2
 -4 0 -2 141.721 85.6656 1
 4 0 2 66.8459 35.4419 2
 -4 0 -3 13.5291 47.0537 1
 4 0 3 19.381 28.727 2
 -4 0 -4 13694.8 553.907 1
 4 0 4 13941.4 450.143 2
 -4 0 -5 69.1534 57.3725 1
 -4 0 -6 21321.7 671.8 1
 -4 0 -7 182.501 86.8275 1
 -4 0 -8 103158 1457.01 1
 -4 0 -9 144.022 81.124 1
 -4 0 -10 906.826 136.914 1
 4 0 10 692.362 223.44 3
 -4 0 -11 2.81599 36.1896 1
 4 0 11 -95.0704 113.401 3
 -4 0 -12 335.702 86.0981 1
 4 0 12 89.7029 129.935 3
 -4 0 -13 51.1032 44.2696 1
 4 0 13 18.5216 93.0418 3
 -4 0 -14 55.7139 48.3156 1
 4 0 14 130.308 169.267 3
 4 0 15 30.2155 105.869 3
 -4 0 -15 135.493 63.9345 1
 4 0 16 2613.97 550.953 3
 4 0 17 80.2846 104.668 3
 4 0 18 10497.6 1159.46 3
 4 0 19 -99.0212 173.093 3
 4 0 20 1924.96 525.064 3
 4 0 21 -25.2971 90.4153 3
 4 0 22 -77.2774 147.93 3
 4 0 23 -3.53081 117.719 3
 4 0 24 2829.4 688.136 3
 4 0 25 158.096 128.578 3
 4 0 26 432.136 334.595 3
 4 -1 -30 879.296 425.985 2
 4 1 -30 1152.79 359.291 2
 4 -1 -29 2894.36 722.09 2
 4 1 -29 2954.83 558.348 2
 4 -1 -28 1637 525.479 2
 4 1 -28 1814.03 423.017 2
 4 -1 -27 1149.6 436.028 2
 4 1 -27 1184.96 330.859 2
 4 -1 -26 907.938 392.637 2
 4 -1 -25 1424.15 459.459 2
 4 -1 -24 72.47 137.715 2
 -4 -1 24 -170.804 174.702 4
 4 -1 -23 1846.56 482.048 2
 -4 -1 23 2052.31 520.372 4
 4 -1 -22 2598.15 545.626 2
 -4 -1 22 1989.87 480.755 4
 -4 -1 21 6749.14 892.408 4
 4 -1 -21 7391.55 887.033 2
 4 -1 -20 4797.53 700.299 2
 -4 -1 20 3726.7 647.23 4
 4 -1 -19 2124.16 454.25 2
 -4 1 19 2195.05 357.662 4
 -4 -1 19 2559.6 527.414 4
 -4 1 18 -58.3714 64.2954 4
 -4 1 18 -104.428 138.098 1
 -4 -1 18 -1.92357 89.3546 4
 4 -1 -18 -1.27265 85.5383 2
 -4 1 17 387.296 143.049 4
 -4 1 17 462.433 156.606 1
 -4 -1 17 798.6 297.959 4
 4 -1 -17 863.741 280.49 2
 -4 1 16 127.516 78.5375 4
 4 1 -16 225.625 147.638 5
 -4 1 16 136.612 79.8861 1
 -4 -1 16 -3.24668 59.7364 4
 4 -1 -16 249.46 166.386 2
 -4 -1 15 41883.9 1891.53 4
 -4 1 15 39838.8 1240.1 4
 4 -1 -15 43291.7 1797.63 2
 -4 1 15 43276 1404.74 1
 4 1 -15 43763 1556.83 5
 -4 1 14 92.3208 95.6012 1
 -4 1 14 78.2491 56.2642 4
 4 1 -14 99.8958 112.783 5
 -4 -1 14 80.2676 101.597 4
 4 -1 -14 143.11 137.518 2
 4 1 -13 1034.66 243.199 5
 -4 1 13 740.392 148.915 4
 -4 1 13 1162.72 218.439 1
 -4 -1 13 1137.93 296.067 4
 4 -1 -13 1195.88 289.346 2
 -4 -1 12 11028.9 901.478 4
 -4 1 12 10956.6 506.883 4
 -4 1 12 11198.4 626.695 1
 4 1 -12 11105.3 770.245 5
 4 -1 -12 10475.5 822.548 2
 -4 1 11 224.51 67.4007 4
 -4 1 11 338.503 124.385 1
 4 1 -11 260.152 133.337 5
 -4 -1 11 333.028 176.904 4
 4 -1 -11 226.699 110.319 2
 4 1 -10 117.677 111.133 5
 4 -1 -10 168.437 75.4774 3
 -4 -1 10 112.725 95.3471 4
 -4 1 10 304.421 113.165 1
 4 -1 -10 205.359 132.684 2
 4 1 -9 6146.65 552.113 5
 -4 -1 9 6553.99 630.235 4
 4 -1 -9 7071.95 435.72 3
 -4 1 9 6575.52 439.758 1
 4 -1 -9 6783.85 619.304 2
 4 -1 -8 21261.3 692.441 3
 -4 -1 8 19658.9 1070.73 4
 -4 1 8 20488 765.544 1
 4 -1 -8 19255.9 1015.63 2
 4 1 -8 20554.3 1009.7 5
 4 1 -7 127609 2472 5
 4 -1 -7 123844 1540.71 3
 -4 -1 7 123600 2567.15 4
 -4 1 7 126378 1858.7 1
 4 -1 -7 125139 2550.11 2
 4 1 -6 8436.05 626.689 5
 4 -1 -6 7972.17 366.987 3
 -4 -1 6 8448.52 654.596 4
 -4 1 6 8146.64 479.627 1
 4 -1 -6 8693.33 665.017 2
 4 -1 -5 153366 1559.81 3
 -4 -1 5 155731 2764.62 4
 4 1 -5 153029 2635.24 5
 -4 1 5 153942 2055.41 1
 4 -1 -5 153658 2755.63 2
 4 -1 -4 861.805 214.634 2
 4 1 -4 1405.08 269.843 5
 -4 1 4 919.196 186.095 1
 -4 1 3 28248.3 891.807 1
 4 1 -3 28543.3 1084.79 5
 4 -1 -3 27213.3 654.51 4
 4 -1 -3 28104.5 1148.49 2
 4 1 -2 15337.5 776.778 5
 -4 1 2 14503.7 638.45 1
 4 -1 -2 15004.7 542.719 4
 4 -1 -2 14361.1 806.175 2
 -4 1 1 2590.8 276.325 1
 4 -1 -1 2944.36 367.818 2
 4 1 -1 3047.76 335.112 5
 4 -1 0 345.815 113.793 2
 -4 1 0 234.085 80.6681 1
 4 -1 1 7948.28 464.916 3
 -4 1 -1 7549.31 480.506 1
 4 -1 2 2806.41 298.399 3
 -4 1 -2 2643.53 290.528 1
 -4 1 -2 2396.7 213.586 2
 4 -1 3 15224.1 744.311 3
 -4 1 -3 15264.2 709.718 1
 -4 1 -3 14873.5 527.505 2
 -4 1 -4 -34.0496 68.8245 1
 4 -1 4 62.2885 60.7859 3
 -4 1 -4 71.3978 29.8603 2
 -4 1 -5 -23.9229 66.0645 1
 4 -1 5 74.0019 60.5357 3
 -4 1 -5 24.8401 29.2198 2
 4 -1 6 39274.1 1415.45 3
 -4 1 -6 37927.3 1146.96 1
 -4 1 -6 36314.6 787.874 2
 -4 1 -7 1156.25 190.697 1
 4 -1 7 1335.84 279.178 3
 -4 1 -7 1115.35 134.57 2
 4 -1 8 3122.3 435.294 3
 -4 1 -8 2910.14 311.168 1
 -4 1 -8 2926.38 211.988 2
 4 1 8 2755.6 202.823 2
 -4 1 -9 17888.6 784.647 1
 4 -1 9 18237.1 1115.57 3
 -4 1 -9 16102.6 494.258 2
 -4 -1 -10 24578.2 1044.84 5
 4 -1 10 25362.2 1367.26 3
 -4 1 -10 25395.2 934.475 1
 -4 1 -10 24054 610.694 2
 -4 -1 -11 2107.12 296.309 5
 -4 1 -11 2033.97 258.218 1
 4 -1 11 1810.1 378.876 3
 -4 1 -11 2080.89 184.177 2
 -4 -1 -12 564.05 153.539 5
 -4 1 -12 529.977 121.634 1
 4 -1 12 513.736 200.801 3
 4 -1 13 6038.55 736.247 3
 -4 1 -13 5204.77 411.539 1
 -4 1 -14 144.112 63.9682 1
 4 -1 14 358.668 222.18 3
 -4 1 -15 15.7578 42.7978 1
 4 -1 15 -5.94179 85.7072 3
 -4 1 -15 35.7927 119.849 5
 4 1 15 213.798 163.965 3
 -4 1 -16 4761.44 693.967 5
 4 1 16 5305.02 792.168 3
 -4 1 -16 5268 389.199 1
 4 -1 16 4777.88 721.204 3
 4 1 17 4942.14 782.504 3
 4 -1 17 5822.03 825.422 3
 4 -1 18 4554.08 755.462 3
 4 1 18 5532.96 835.682 3
 4 1 19 5316.99 844.076 3
 4 -1 19 4447.72 769.625 3
 4 -1 20 1478.39 448.984 3
 4 1 20 1454.69 450.25 3
 4 -1 21 1081.7 400.282 3
 4 1 21 1182.66 447.689 3
 4 -1 22 447.747 266.802 3
 4 1 22 332.989 230.992 3
 4 -1 23 233.741 196.717 3
 4 1 23 448.791 277.399 3
 4 -1 24 196.273 216.412 3
 4 1 24 -164.262 133.487 3
 4 -1 25 751.35 366.928 3
 4 1 25 837.958 391.398 3
 4 -1 26 226.29 204.797 3
 4 1 26 163.371 188.202 3
 4 -2 -29 88.8344 153.343 2
 4 -2 -28 28.4819 161.105 2
 4 -2 -27 218.493 220.379 2
 4 -2 -26 1216.78 446.945 2
 -4 -2 26 1132.77 440.333 4
 4 -2 -25 75.7333 145.652 2
 -4 -2 25 6.98849 138.92 4
 4 2 -24 1414.99 347.607 5
 4 -2 -24 1331.32 475.862 2
 -4 -2 24 1543.54 502.155 4
 4 -2 -23 2131.17 581.833 2
 4 2 -23 2686.42 476.002 5
 -4 -2 23 2966.78 676.683 4
 4 2 -22 332.617 176.416 5
 4 -2 -22 56.6446 101.077 2
 -4 -2 22 83.5538 97.4026 4
 4 2 -21 222.426 145.92 5
 4 -2 -21 593.807 315.628 2
 -4 -2 21 108.161 132.554 4
 4 2 -20 1559.19 371.467 5
 4 -2 -20 1158.09 386.111 2
 -4 2 20 1528.75 280.687 1
 -4 -2 20 2075.72 533.077 4
 -4 2 19 1185.69 241.67 1
 4 -2 -19 754.687 298.796 2
 4 2 -19 1166.9 320.363 5
 -4 2 19 954.144 293.665 3
 -4 -2 19 891.065 360.778 4
 4 -2 -18 352.753 180.596 2
 -4 2 18 1356.47 343.935 3
 4 2 -18 1042.74 301.433 5
 -4 2 18 1258.32 238.936 1
 -4 -2 18 1308.72 416.266 4
 4 -2 -17 2185.21 511.983 2
 -4 2 17 2333.4 426.609 3
 4 2 -17 1717.29 386.141 5
 -4 2 17 2126.39 294.603 1
 -4 -2 17 2052 504.204 4
 -4 2 16 1327.72 306.909 3
 4 -2 -16 1797.75 450.486 2
 4 2 -16 1423.74 350.213 5
 -4 2 16 1494.79 239.811 1
 -4 -2 16 1516.81 417.613 4
 4 2 -15 4379.99 612.549 5
 4 -2 -15 3634.1 632.512 2
 -4 -2 15 4458.4 711.431 4
 -4 2 15 5027.92 417.556 1
 4 -2 -14 107.982 70.5991 2
 4 2 -14 81.6054 157.147 5
 -4 -2 14 75.2737 68.4471 4
 -4 2 14 246.006 107.103 1
 4 -2 -13 86.544 75.8759 2
 4 2 -13 463.016 250.512 5
 -4 2 13 299.545 104.577 1
 -4 -2 13 344.662 190.618 4
 4 2 -12 836.306 270.652 5
 -4 2 12 908.567 190.912 4
 4 -2 -12 755.61 282.889 2
 -4 2 12 1120.34 198.675 1
 -4 -2 12 605.657 259.1 4
 4 2 -11 882.684 289.965 5
 -4 2 11 846.232 177.561 1
 4 -2 -11 790.392 275.494 2
 -4 2 11 777.161 157.397 4
 -4 -2 11 581.491 223.008 4
 4 2 -10 4933.98 631.124 5
 -4 2 10 5824.28 444.714 1
 -4 -2 10 4821.41 673.253 4
 -4 2 10 4858.69 361.48 4
 4 -2 -10 5084.4 695.911 2
 4 2 -9 32618.7 1605.49 5
 -4 2 9 35677.3 1137.05 1
 -4 -2 9 33887.8 1757.61 4
 -4 2 9 34727 911.683 4
 4 -2 -9 33048.8 1741.11 2
 -4 2 8 385.638 128.658 1
 4 2 -8 599.323 258.52 5
 -4 -2 8 267.187 161.448 4
 4 -2 -8 233.813 118.7 2
 -4 2 8 168.842 46.9527 4
 -4 2 7 61177.6 1568.74 1
 -4 -2 7 57988 2230.09 4
 -4 2 7 60012.6 1061.17 4
 4 -2 -7 59382.8 2265.13 2
 4 2 -7 61631.9 2151.54 5
 4 2 -6 74235.6 2348.1 5
 -4 2 6 77316.8 1811.19 1
 -4 -2 6 74640.6 2464.02 4
 -4 2 6 73319.3 1156.43 4
 4 -2 -6 72765.2 2479.84 2
 4 2 -5 1709.2 370.422 5
 4 -2 -5 1393.58 321.884 2
 4 -2 -5 1478.45 197.674 4
 -4 -2 5 1523.25 347.558 4
 -4 2 5 1313.77 222.453 1
 -4 2 4 56.0401 108.129 1
 4 2 -4 78.5167 115.852 5
 -4 -2 4 55.8053 78.0343 4
 4 -2 -4 123.833 67.0961 4
 4 2 -3 15404 1022.91 5
 -4 2 3 16314.4 917.709 1
 -4 -2 3 14232.2 1042.2 4
 4 -2 -3 16409.2 794.768 4
 4 2 -2 20063.2 1136.69 5
 -4 2 2 20584.6 1052.93 1
 4 -2 -2 19809.5 933.021 4
 4 2 -1 391.697 171.215 5
 -4 2 1 457.773 191.767 1
 4 -2 -1 367.7 138.426 4
 4 2 0 5467.96 566.736 5
 -4 2 0 5612.58 571.415 1
 4 -2 0 5539.12 541.37 4
 4 2 1 15046.4 926.638 5
 4 -2 1 15872.2 713.477 3
 -4 2 -1 16016.5 974.19 1
 4 -2 1 15616.1 938.477 4
 -4 2 -2 351.399 140.517 1
 4 -2 2 723.323 358.147 4
 4 -2 2 434 123.404 3
 4 2 2 371.843 166.627 5
 4 -2 3 106.848 113.093 4
 4 2 3 54.0807 108.312 5
 4 -2 3 27.0694 44.6053 3
 -4 2 -3 -21.6001 95.5864 1
 4 -2 4 254.708 150.348 4
 4 2 4 44.9673 92.8546 5
 4 -2 4 145.848 77.1924 3
 -4 2 -4 214.139 124.74 1
 4 2 5 15587 814.762 5
 -4 2 -5 17619.6 1081.11 1
 4 -2 5 16296.9 1054.29 4
 4 -2 5 16072.4 924.198 3
 4 2 6 1663.91 260.354 5
 4 -2 6 1664.79 342.402 4
 4 -2 6 1740.39 325.446 3
 -4 2 -6 1456.97 312.803 1
 4 -2 7 278.094 170.689 4
 4 2 7 747.608 164.587 5
 4 -2 7 670.454 207.45 3
 -4 2 -7 522.787 192.2 1
 -4 2 -8 11216.2 880.26 1
 4 -2 8 12371.5 983.532 4
 4 -2 8 12194.6 918.066 3
 4 2 8 11652.4 593.557 5
 4 -2 9 4175.64 568.675 3
 -4 2 -9 4026.43 533.967 1
 4 -2 9 3560.72 545.328 4
 4 -2 10 2196.9 438.257 4
 4 -2 10 2546.26 466.066 3
 -4 2 -10 2654.39 434.236 1
 -4 2 -11 10217.8 845.278 1
 4 -2 11 9199.25 921.064 4
 4 -2 11 8713.61 874.413 3
 4 -2 12 50408.9 2171.07 3
 -4 2 -12 50710.2 1887.12 1
 4 -2 12 49846.4 2178.47 4
 4 -2 13 4160.37 647.513 3
 -4 2 -13 4029.03 526.467 1
 4 -2 13 3958.15 627.726 4
 4 -2 14 2306.62 483.095 4
 4 -2 14 2343.47 497.331 3
 -4 2 -14 2435.28 606.636 5
 -4 2 -14 2406.64 409.423 1
 4 -2 15 13404.5 1234.83 3
 -4 2 -15 15420.6 1022.29 1
 -4 2 -15 15389.7 1524.82 5
 4 -2 15 14042.6 1254.46 4
 4 -2 16 339.67 294.738 4
 4 -2 16 -93.8212 115.607 3
 -4 2 -16 110.43 197.536 5
 -4 2 -16 16.9136 105.211 1
 -4 2 -17 606.125 215.164 1
 4 -2 17 520.714 249.412 4
 4 -2 17 342.904 237.553 3
 -4 2 -17 340.412 242.316 5
 4 -2 18 500.175 267.022 4
 4 -2 18 240.306 171.212 3
 4 2 18 319.061 240.001 3
 4 -2 19 1164.64 404.719 4
 4 -2 19 907.163 356.534 3
 4 2 19 974.308 401.486 3
 4 -2 20 1184.62 416.865 4
 4 -2 20 1421.02 464.305 3
 4 2 20 1528.4 480.243 3
 4 -2 21 157.668 176.32 4
 4 -2 21 -75.4612 129.975 3
 4 2 21 -67.3077 148.88 3
 4 -2 22 4261.06 810.942 4
 4 -2 22 3841.17 797.657 3
 4 2 22 4632.33 867.406 3
 4 -2 23 1214.32 442.264 4
 4 -2 23 1335.01 502.664 3
 4 2 23 2451.84 643.594 3
 4 -2 24 2031.98 607.651 4
 4 -2 24 2066.3 643.008 3
 4 2 24 1605.99 517.914 3
 4 -2 25 225.547 223.141 4
 4 -2 25 87.5227 133.46 3
 4 2 25 168.957 236.683 3
 -4 -3 27 322.617 348.564 4
 -4 -3 26 345.308 305.87 4
 4 3 -25 130.696 142.716 5
 -4 -3 25 -89.0625 137.944 4
 4 3 -24 236.539 214.714 5
 -4 -3 24 37.833 94.919 4
 4 -3 -23 -32.6008 113.073 2
 -4 -3 23 242.364 217.706 4
 4 3 -22 5251.78 788.24 5
 4 -3 -22 6041.79 1034.21 2
 -4 -3 22 4959.69 947.534 4
 4 3 -21 55.3724 144.447 5
 4 -3 -21 -128.156 167.504 2
 -4 -3 21 62.925 146.969 4
 4 -3 -20 258.327 240.166 2
 4 3 -20 -69.662 114.887 5
 -4 -3 20 289.097 210.041 4
 4 3 -19 4187.95 715.76 5
 4 -3 -19 4850.26 874.32 2
 -4 -3 19 4628.36 861.048 4
 4 3 -18 863.476 333.292 5
 4 -3 -18 952.217 389.838 2
 -4 -3 18 1532.69 486.95 4
 -4 3 18 1493.7 250.789 1
 4 3 -17 38.8725 123.263 5
 -4 3 17 11.0664 59.8783 1
 -4 -3 17 63.0257 171.893 4
 -4 3 16 1056.2 211.853 1
 4 3 -16 129.322 116.763 5
 -4 -3 16 714.25 329.955 4
 -4 3 15 756.432 175.736 1
 -4 -3 15 1049.61 404.473 4
 4 3 -15 393.392 201.244 5
 4 3 -14 4710.38 748.691 5
 -4 3 14 4643.6 435.872 1
 -4 -3 14 4370.23 769.426 4
 4 3 -13 10010.3 1122.49 5
 -4 3 13 10868 693.933 1
 -4 -3 13 8687.06 1083.45 4
 4 3 -12 2155.5 540.136 5
 -4 3 12 2084.02 313.898 1
 -4 -3 12 2099.56 532.876 4
 -4 3 11 1937.08 312.781 1
 4 3 -11 1602.35 449.21 5
 -4 -3 11 1222.7 396.866 4
 4 3 -10 11.0446 115.737 5
 -4 -3 10 106.801 116.059 4
 4 3 -9 1661.52 445.762 5
 -4 -3 9 2311 553.364 4
 -4 3 9 2293.31 379.501 1
 -4 3 8 3016.34 433.939 1
 -4 -3 8 3026.35 586.062 4
 4 3 -8 2376.53 506.441 5
 -4 3 7 389.386 171.443 1
 4 3 -7 501.42 214.965 5
 -4 -3 7 393.681 195.297 4
 -4 3 6 1097.12 286.346 1
 4 3 -6 637.866 231.593 5
 -4 -3 6 868.242 312.671 4
 -4 3 5 1660.82 379.864 1
 4 3 -5 1991.87 444.03 5
 4 -3 -5 1898.53 330.919 4
 -4 -3 5 2634.56 541.646 4
 4 3 -4 -122.98 209.523 5
 -4 -3 4 -19.1197 131.332 4
 4 -3 -4 -56.3217 86.5782 4
 -4 3 4 126.496 109.294 1
 4 3 -3 892.975 269.415 5
 -4 -3 3 1089.08 336.168 4
 4 -3 -3 1323.28 294.041 4
 -4 3 3 1358.33 319.678 1
 4 3 -2 573.11 253.016 5
 -4 3 2 882.7 120.469 3
 -4 -3 2 673.454 254.82 4
 4 -3 -2 783.681 235.348 4
 -4 3 2 1086.3 294.128 1
 4 3 -1 4836.28 689.174 5
 -4 3 1 5384.97 692.041 1
 4 -3 -1 5099.54 620.609 4
 -4 3 1 4940.96 335.665 3
 4 3 0 10503.4 1005.52 5
 -4 3 0 11242.5 566.113 3
 -4 3 0 11558.1 1037.38 1
 4 -3 0 10201 903.004 4
 4 3 1 11442.1 1029.64 5
 -4 3 -1 12894.1 667.502 3
 -4 3 -1 14365.7 1170.37 1
 4 -3 1 12520.7 1036.88 4
 4 3 2 337.383 176.393 5
 -4 3 -2 1020.23 349.023 1
 4 -3 2 363.059 193.972 4
 4 3 3 910.707 303.883 5
 4 -3 3 983.785 319.202 4
 4 3 4 1707.19 370.274 5
 4 -3 4 1748.44 411.823 4
 4 3 5 663.38 227.925 5
 4 -3 5 563.604 244.248 4
 4 -3 6 101.369 62.9005 4
 4 3 6 379.916 175.424 5
 4 -3 7 188.563 105.988 4
 4 3 7 196.871 125.119 5
 4 -3 8 2664.12 548.525 4
 4 3 8 3222.27 447.401 5
 4 3 9 7450.03 639.779 5
 4 -3 9 9049.59 1031.44 4
 4 3 10 27560.7 1143.47 5
 4 -3 10 27100.1 1815.98 4
 4 3 11 11879 702.685 5
 4 -3 11 12051 1233.38 4
 4 -3 12 16925.4 1388.78 3
 -4 3 -12 21832.9 2179.77 5
 4 -3 12 17161.4 1497.44 4
 4 -3 13 6175.16 874.558 3
 -4 3 -13 6431.71 1194.94 5
 4 -3 13 5456.65 869.073 4
 -4 3 -14 18864.8 1983.15 5
 4 -3 14 17677.8 1493.68 3
 4 -3 14 16186.4 1504.24 4
 4 -3 15 278.336 266.011 4
 4 -3 15 -98.1473 174.329 3
 -4 3 -15 56.2756 174.241 5
 4 -3 16 975.814 388.372 4
 4 -3 16 714.543 324.432 3
 -4 3 -16 374.311 289.777 5
 4 -3 17 101.436 141.522 3
 -4 3 -17 92.1247 115.163 1
 -4 3 -17 151.061 201.041 5
 4 -3 17 -49.8957 138.563 4
 4 -3 18 8386.12 1141.02 3
 -4 3 -18 8621.11 972.453 1
 -4 3 -18 6416.57 1120.1 5
 4 -3 18 8772.54 1196.6 4
 4 -3 19 2559.53 641.389 3
 4 -3 19 996.904 419.376 4
 4 -3 20 2126.2 601.73 4
 4 -3 20 1674.62 525.808 3
 4 -3 21 690.819 284.609 3
 4 -3 21 508.126 354.791 4
 4 3 21 319.233 247.691 3
 4 -3 22 -151.145 179.073 3
 4 3 22 -192.477 169.198 3
 4 -3 23 1256.21 490.98 4
 4 3 23 1349.15 485.12 3
 4 -3 24 1549.82 584.411 4
 4 3 24 1687.19 555.989 3
 -4 -4 26 -134.952 190.634 4
 4 4 -25 276.337 219.724 5
 -4 -4 25 -120.719 277.688 4
 4 4 -24 732.071 357.028 5
 -4 -4 24 94.1298 278.437 4
 4 4 -23 153.318 181.119 5
 -4 -4 23 151.408 225.222 4
 4 4 -22 -36.266 135.001 5
 -4 -4 22 11.2513 104.221 4
 4 4 -21 37.6081 129.821 5
 -4 -4 21 307.084 295.795 4
 4 4 -20 500.085 322.731 5
 -4 -4 20 281.714 257.982 4
 4 4 -19 166.968 168.945 5
 -4 -4 19 228.695 270.211 4
 4 4 -18 2526.01 657.566 5
 -4 -4 18 3815.53 850.262 4
 4 4 -17 747.442 350.74 5
 -4 4 17 1144.5 235.58 1
 -4 -4 17 732.398 387.632 4
 4 4 -16 2860.34 684.754 5
 -4 4 16 3166.96 410.693 1
 -4 -4 16 2541.33 694.18 4
 4 4 -15 2559.2 649.516 5
 -4 4 15 2654.13 391.9 1
 -4 -4 15 2061.89 575.899 4
 -4 4 14 60.7324 79.5038 1
 -4 -4 14 33.4279 110.336 4
 4 4 -13 4542.91 858.011 5
 -4 4 13 4958.01 582.438 1
 -4 -4 13 4821.58 917.603 4
 4 4 -12 2902.42 722.939 5
 -4 4 12 3059.11 489.827 1
 -4 -4 12 2163.4 608.782 4
 4 4 -11 5276.4 919.701 5
 -4 4 11 5113.38 641.698 1
 -4 -4 11 5822.7 972.468 4
 4 4 -10 22867.1 1910.12 5
 -4 4 10 22707 1393.16 1
 -4 -4 10 23334.7 1919.5 4
 4 4 -9 38491.2 2484.78 5
 -4 4 9 44369.3 2017.98 1
 -4 -4 9 42110.8 2541.79 4
 4 4 -8 7589.45 1104.5 5
 -4 4 8 9219.39 949.947 1
 -4 -4 8 6426.95 994.529 4
 4 4 -7 744.432 329.956 5
 -4 -4 7 753.291 342.114 4
 -4 4 7 804.862 293.933 1
 4 4 -6 1187.57 406.89 5
 4 -4 -6 1356.41 338.97 4
 -4 -4 6 779.713 310.601 4
 -4 4 6 1338.79 361.519 1
 4 4 -5 -129.891 238.198 5
 4 -4 -5 83.3941 80.9377 4
 -4 -4 5 -23.5053 189.326 4
 -4 4 5 14.459 150.389 1
 4 4 -4 1475.23 434.407 5
 -4 -4 4 1524.98 473.976 4
 4 -4 -4 1392.42 363.896 4
 -4 4 4 2260.37 516.278 1
 -4 4 3 -43.4508 130.058 1
 4 4 -3 -122.35 246.338 5
 -4 -4 3 7.78522 80.3874 4
 4 -4 -3 -131.596 132.547 4
 4 4 -2 741.398 306.321 5
 -4 4 2 465.847 141.315 1
 -4 -4 2 582.706 236.049 4
 4 -4 -2 732.315 275.337 4
 4 4 -1 2849.78 618.315 5
 4 -4 -1 3347.82 596.832 4
 4 4 0 2702.45 607.397 5
 4 -4 0 3301.39 609.884 4
 4 4 1 17476.6 1521.79 5
 4 -4 1 19598.7 1497.53 4
 4 4 2 -37.0594 93.0209 5
 4 -4 2 -92.5126 114.448 4
 4 4 3 105.615 65.0484 5
 4 -4 3 410.612 227.019 4
 4 4 4 2985.31 596.277 5
 4 -4 4 3578.11 691.049 4
 4 4 5 773.001 284.363 5
 4 -4 5 975.959 359.299 4
 4 4 6 1672.93 428.794 5
 4 -4 6 1345.49 425.4 4
 4 4 7 3003.54 574.447 5
 4 -4 7 2703.08 635.383 4
 4 4 8 -1.69519 102.124 5
 4 -4 8 65.0599 141.044 4
 4 4 9 895.408 296.078 5
 -4 4 -9 1298.42 674.635 5
 4 -4 9 1081.11 402.161 4
 4 4 10 126.578 128.386 5
 -4 4 -10 -169.494 359.867 5
 4 -4 10 225.729 268.227 4
 -4 4 -11 1886.9 727.11 5
 4 -4 11 1550.28 502.511 4
 -4 4 -12 5678.39 1281.14 5
 4 -4 12 4369.07 857.108 4
 -4 4 -13 128.082 193.95 5
 4 -4 13 378.696 312.477 4
 -4 4 -14 334.209 306.345 5
 4 -4 14 261.413 202.088 4
 -4 4 -15 69.5286 162.828 5
 4 -4 15 35.2169 87.145 4
 -4 4 -16 2320.29 766.967 5
 4 -4 16 1825.61 581.201 4
 4 -4 17 -139.811 246.376 4
 -4 4 -17 -157.701 210.124 5
 4 -4 18 594.683 324.636 4
 -4 4 -18 532.538 372.662 5
 4 -4 19 -178.964 194.985 4
 4 -4 20 1307.36 548.184 4
 4 -4 21 631.778 384.66 4
 4 4 22 1809.11 564.07 3
 -4 -5 22 11.4172 83.8924 4
 4 5 -21 473.669 323.696 5
 -4 -5 21 113.626 187.472 4
 4 5 -20 68.0678 160.533 5
 -4 -5 20 167.783 219.958 4
 4 5 -19 -49.03 115.375 5
 -4 -5 19 36.1017 73.438 4
 4 5 -18 101.771 91.1947 5
 -4 -5 18 115.919 169.41 4
 4 5 -17 -85.992 75.2504 5
 -4 -5 17 -83.5762 224.875 4
 4 5 -16 -145.552 228.903 5
 -4 5 16 -106.998 111.049 1
 -4 -5 16 -73.4648 108.528 4
 4 5 -15 -168.811 197.344 5
 -4 5 15 -199.578 151.609 1
 -4 -5 15 -70.4293 210.957 4
 4 5 -14 57.2904 89.471 5
 -4 5 14 195.675 141.281 1
 -4 -5 14 198.13 203.028 4
 -4 5 13 2571.73 508.104 1
 4 5 -13 2123.69 626.87 5
 -4 -5 13 2189.25 678.2 4
 -4 5 12 2770.54 552.029 1
 4 5 -12 1571.98 557.659 5
 -4 -5 12 2132.31 645.309 4
 4 5 -11 5950.45 1091.38 5
 -4 5 11 8075.12 965.831 1
 -4 -5 11 5727.98 1048.2 4
 -4 5 10 -61.0875 121.877 1
 4 5 -10 -29.3593 256.837 5
 -4 -5 10 -378.036 277.597 4
 4 5 -9 -35.0915 243.147 5
 -4 -5 9 -31.704 92.8933 4
 -4 5 9 -45.513 80.3784 1
 4 5 -8 216.569 217.456 5
 -4 -5 8 -146.083 193.768 4
 -4 5 8 -109.765 188.06 1
 4 5 -7 370.026 108.194 5
 -4 -5 7 102.094 110.554 4
 -4 5 7 634.709 296.413 1
 4 5 -6 385.648 170.671 5
 -4 -5 6 243.374 287.752 4
 -4 5 6 345.408 292.897 1
 4 5 -5 103.296 142.481 5
 -4 5 5 28.3094 130.788 1
 4 -5 -5 83.031 105.499 4
 -4 -5 5 49.696 85.1401 4
 4 5 -4 553.309 296.149 5
 -4 -5 4 709.838 352.294 4
 4 -5 -4 581.085 269.319 4
 4 5 -3 -165.654 202.471 5
 -4 -5 3 143.882 115.897 4
 4 -5 -3 -89.7266 135.743 4
 4 5 -2 360.044 191.721 5
 4 -5 -2 753.626 315.679 4
 4 5 -1 33.3511 171.42 5
 4 -5 -1 182.63 160.903 4
 4 5 0 1091.62 412.625 5
 4 -5 0 921.649 338.372 4
 4 5 1 -124.792 230.452 5
 4 -5 1 99.2433 58.1689 4
 4 5 2 2338.28 582.879 5
 4 -5 2 2281.25 581.098 4
 4 5 3 2248.26 588.514 5
 4 -5 3 2443.63 624.248 4
 4 5 4 2284.67 589.925 5
 4 -5 4 3236.26 725.588 4
 4 5 5 -141.463 235.105 5
 -4 5 -5 -250.303 303.593 5
 4 -5 5 13.5295 73.2734 4
 4 5 6 -92.3625 182.503 5
 -4 5 -6 426.39 180.321 5
 4 -5 6 198.754 261.708 4
 4 5 7 17.462 90.3761 5
 -4 5 -7 122.694 351.271 5
 4 -5 7 -148.476 188.144 4
 4 5 8 305.686 181.418 5
 -4 5 -8 312.061 461.874 5
 4 -5 8 137.754 99.7782 4
 4 5 9 1362.2 412.248 5
 -4 5 -9 796.298 524.418 5
 4 -5 9 641.413 355.96 4
 -4 5 -10 1435.73 718.032 5
 4 -5 10 1016.9 445.524 4
 -4 5 -11 -344.752 372.03 5
 4 -5 11 368.671 433.774 4
 -4 5 -12 12.1103 260.596 5
 4 -5 12 644.947 382.568 4
 -4 5 -13 374.726 279.224 5
 4 -5 13 353.399 294.724 4
 -4 5 -14 617.334 471.677 5
 4 -5 14 494.52 321.438 4
 -4 5 -15 358.519 385.404 5
 4 -5 15 483.939 403.379 4
 -4 5 -16 -511.641 417.119 5
 4 -5 16 78.0981 85.5258 4
 -4 5 -17 676.606 514.459 5
 4 -5 17 64.5845 153.025 4
 -4 5 -18 115.887 320.841 5
 4 -5 18 422.945 325.163 4
 -4 5 -19 411.661 352.657 5
 -4 -6 16 594.582 390.706 4
 -4 -6 15 34.9825 115.748 4
 -4 6 14 22.3883 119.424 1
 4 6 -14 -588.762 380.012 5
 -4 -6 14 -195.834 224.181 4
 -4 6 13 273.301 183.666 1
 -4 -6 13 503.927 332.096 4
 -4 6 12 96.0527 189.229 1
 4 6 -12 25.2974 236.094 5
 -4 -6 12 241.971 215.439 4
 -4 6 11 98.0029 151.865 1
 4 6 -11 -137.278 276.753 5
 -4 -6 11 50.3352 143.246 4
 -4 -6 10 323.97 256.23 4
 -4 6 10 -100.176 231.175 1
 4 6 -9 1026.35 466.501 5
 -4 -6 9 333.119 276.381 4
 -4 6 9 418.336 216.031 1
 4 6 -8 -91.273 334.949 5
 -4 -6 8 382.121 297.096 4
 -4 6 8 292.739 205.217 1
 4 6 -7 22.999 125.42 5
 -4 -6 7 338.043 240.307 4
 -4 6 7 410.917 308.756 1
 4 6 -6 16.8212 230.273 5
 -4 6 6 419.731 345.109 1
 -4 6 5 651.55 342.614 1
 4 6 -5 1429.65 555.041 5
 -4 -6 5 1275.54 512.155 4
 4 6 -4 -12.0597 111.055 5
 -4 6 4 -19.7298 154.303 5
 -4 -6 4 -89.4755 162.8 4
 4 6 -3 2444.76 730.486 5
 -4 6 3 3833.06 1228.06 5
 4 -6 -3 2185.19 580.981 4
 4 6 -2 279.096 311.222 5
 -4 6 2 801.448 648.896 5
 4 -6 -2 644.104 315.896 4
 4 6 -1 -134.448 186.82 5
 4 -6 -1 100.931 108.626 4
 4 6 0 1214.85 481.291 5
 -4 6 0 2721.31 1060.38 5
 4 -6 0 2154.59 607.875 4
 4 6 1 724.431 342.718 5
 -4 6 -1 1150.6 690.855 5
 4 -6 1 1174.03 456.738 4
 4 6 2 259.265 192.611 5
 -4 6 -2 503.438 540.648 5
 4 -6 2 805.267 397.52 4
 4 6 3 610.254 292.187 5
 -4 6 -3 905.781 577.545 5
 4 -6 3 387.871 322.355 4
 4 6 4 992.181 428.679 5
 -4 6 -4 1779.59 839.994 5
 4 -6 4 762.108 396.936 4
 4 6 5 153.051 104.985 5
 -4 6 -5 138.643 410.414 5
 4 -6 5 173.828 155.144 4
 4 6 6 -159.028 224.923 5
 -4 6 -6 -64.134 214.85 5
 4 -6 6 32.6979 109.977 4
 4 6 7 291.222 165.146 5
 -4 6 -7 1343.78 706.493 5
 4 -6 7 662.06 377.679 4
 -4 6 -8 1498.38 827.263 5
 4 -6 8 798.958 388.775 4
 -4 6 -9 1589.91 927.534 5
 4 -6 9 1205.77 534.222 4
 -4 6 -10 33.9115 291.136 5
 4 -6 10 -81.2606 157.216 4
 -4 6 -11 556.655 503.579 5
 4 -6 11 -359.049 303.342 4
 -4 6 -12 -736.089 576.418 5
 4 -6 12 346.183 258.689 4
 -4 6 -13 116.816 235.767 5
 4 -6 13 367.013 385.159 4
 -4 6 -14 229.724 338.894 5
 4 -6 14 42.8704 241.084 4
 -4 6 -15 3070.68 1130.46 5
 -4 7 11 -39.9704 257.779 1
 -4 7 10 -231.454 242.57 1
 -4 7 9 -328.122 309.99 1
 -4 7 8 -43.2523 174.253 1
 -4 7 7 855.478 398.255 1
 -4 7 6 176.779 311.802 1
 -4 7 5 4267 1098.95 1
 4 7 -3 31.5689 127.072 5
 4 7 -2 396.072 271.764 5
 4 7 -1 450.249 330.296 5
 4 7 0 237.778 248.86 5
 4 7 1 -743.334 416.299 5
 4 7 2 -859.709 444.148 5
 4 -7 2 509.521 331.16 4
 4 7 3 -36.6468 187.457 5
 4 -7 3 163.883 205.932 4
 4 7 4 -514.094 337.68 5
 4 -7 4 567.62 347.951 4
 4 7 5 -625.397 373.539 5
 4 -7 5 114.641 186.031 4
 4 -7 6 -7.36785 84.065 4
 4 -7 7 -46.0671 124.595 4
 4 -7 8 402.408 353.749 4
 5 0 -29 -18.5701 92.4362 2
 5 0 -28 2347.01 561.833 2
 5 0 -27 120.731 129.988 2
 5 0 -26 468.05 222.181 2
 5 0 -25 -85.6276 62.6427 2
 5 0 -24 33.9702 43.8264 2
 5 0 -23 -94.5471 108.32 2
 5 0 -22 252.194 172.083 2
 5 0 -21 91.5439 162.798 2
 5 0 -20 5105.46 610.587 2
 5 0 -19 224.902 159.692 2
 5 0 -18 14854.4 981.349 2
 5 0 -17 173.532 150.279 2
 -5 0 17 39.3586 126.937 4
 -5 0 16 19852.2 1113.78 4
 5 0 -16 20315.1 1071.44 2
 -5 0 15 -179.912 103.522 4
 -5 0 14 1306.64 256.914 4
 -5 0 13 -812.277 239.784 1
 -5 0 13 75.7806 72.4522 4
 -5 0 12 3744.42 371.992 4
 -5 0 12 3474.97 461.012 1
 -5 0 11 -94.3873 99.7656 1
 -5 0 11 53.8176 56.8481 4
 -5 0 10 535.997 170.426 1
 -5 0 10 859.962 157.541 4
 -5 0 9 -48.6514 91.7 1
 -5 0 8 1765.61 291.665 1
 5 0 -8 1778.95 180.578 4
 5 0 -7 28.1573 28.0149 4
 -5 0 7 9.86763 75.4859 1
 5 0 -6 44917.9 1099.28 4
 -5 0 6 44217.6 1397.68 1
 5 0 -5 520.848 133.924 4
 -5 0 5 519.689 191.113 1
 5 0 -4 9819.23 599.683 4
 -5 0 4 9262.19 602.695 1
 5 0 -3 7.08664 33.8937 4
 -5 0 3 133.292 128.541 1
 -5 0 2 14972.3 733.677 1
 -5 0 1 93.3561 90.905 1
 5 0 -1 113.612 66.6906 2
 -5 0 0 5199.8 419.726 1
 5 0 0 4043.74 309.648 2
 -5 0 -1 65.8134 66.3947 1
 5 0 1 12.04 48.8363 2
 -5 0 -2 4338.21 371.934 1
 5 0 2 4046.02 301.892 2
 5 0 3 23.5269 37.8842 2
 -5 0 -3 189.062 121.621 1
 -5 0 -4 154891 2164.31 1
 5 0 4 157790 1845.73 2
 -5 0 -5 204.474 128.612 1
 5 0 5 7.10414 36.2807 2
 -5 0 -6 17104.4 704.989 1
 -5 0 -7 78.8884 76.1323 1
 -5 0 -8 31936.1 961.127 1
 -5 0 -9 168.716 106.878 1
 5 0 10 13297.6 1065.27 3
 -5 0 -10 12576.2 602.02 1
 -5 0 -11 75.2547 68.2677 1
 5 0 11 16.7436 102.611 3
 -5 0 -12 840.78 157.918 1
 5 0 12 1012.28 323.176 3
 5 0 13 14.6708 100.977 3
 -5 0 -13 66.9934 83.3163 1
 5 0 14 -65.6724 136.29 3
 -5 0 -14 104.214 71.219 1
 5 0 15 122.774 162.186 3
 5 0 16 2803.78 582.147 3
 5 0 17 76.094 183.646 3
 5 0 18 19077.3 1596.91 3
 5 0 19 -56.4266 96.2522 3
 5 0 20 263.277 216.095 3
 5 0 21 -43.6332 80.0563 3
 5 0 22 106.784 152.497 3
 5 0 23 75.1899 141.378 3
 5 0 24 530.285 303.819 3
 5 0 25 137.769 200.788 3
 5 -1 -28 184.413 230.051 2
 5 1 -28 71.778 125.619 2
 5 -1 -27 4589.68 871.689 2
 5 1 -27 4088.52 627.414 2
 5 -1 -26 156.449 146.93 2
 5 1 -26 853.079 286.411 2
 5 -1 -25 1046.75 402.304 2
 5 -1 -24 91.6908 169.581 2
 5 -1 -23 139.299 159.952 2
 5 -1 -22 839.005 321.406 2
 5 -1 -21 -30.7957 104.24 2
 5 -1 -20 929.262 335.212 2
 -5 -1 20 597.427 264.935 4
 5 -1 -19 626.624 249.921 2
 -5 1 19 191.253 121.135 1
 -5 -1 19 329.102 187.026 4
 5 -1 -18 199.989 147.05 2
 -5 1 18 -106.621 155.22 1
 -5 -1 18 -44.2795 103.601 4
 -5 -1 17 8595.25 914.137 4
 5 -1 -17 7462.53 830.776 2
 -5 1 17 6927.72 665.267 1
 -5 -1 16 25736.7 1538.06 4
 5 -1 -16 27312.8 1541.01 2
 -5 1 16 27668.3 1273.27 1
 -5 1 15 102.641 133.991 1
 -5 -1 15 64.6306 70.3375 4
 -5 -1 14 11791.4 980.542 4
 5 -1 -14 11964 968.712 2
 -5 1 14 12813 803.663 1
 -5 -1 13 149.273 99.1368 4
 -5 1 13 763.989 202.101 1
 5 -1 -13 349.779 189.172 2
 -5 1 12 1688.41 273.682 1
 -5 -1 12 849.443 246.444 4
 5 -1 -12 1823.56 362.128 2
 -5 -1 11 5442.71 605.5 4
 -5 1 11 5611.52 480.173 1
 5 -1 -11 5210.47 596.564 2
 5 -1 -10 4245.27 366.809 3
 -5 -1 10 4370.89 517.11 4
 -5 1 10 4332.17 414.223 1
 5 -1 -10 3873.93 513.331 2
 5 -1 -9 9575.28 524.97 3
 -5 -1 9 9975.77 760.701 4
 -5 1 9 11245 645.25 1
 5 -1 -9 9558.26 782.86 2
 5 -1 -8 38668 1014.3 3
 -5 -1 8 39810.9 1481.83 4
 -5 1 8 42686.8 1236.28 1
 5 -1 -8 42491.2 1639 2
 5 -1 -7 1360.44 299.944 2
 -5 1 7 1247.55 225.405 1
 5 -1 -7 940.308 154.888 3
 -5 -1 7 1174.91 255.656 4
 5 -1 -6 119.54 111.731 2
 -5 1 6 492.836 154.712 1
 -5 1 5 41001.4 1170.03 1
 5 -1 -5 41331.9 1532.93 2
 -5 1 4 20862.8 823.765 1
 5 -1 -4 20638.7 519.136 4
 5 -1 -4 20782 1076.83 2
 -5 1 3 33928.5 1055.72 1
 5 -1 -3 33837.6 813.679 4
 5 -1 -3 32587.5 1333.41 2
 -5 1 2 8552.92 535.498 1
 5 -1 -2 8350.53 665.918 2
 -5 1 1 26201.1 927.698 1
 -5 -1 1 26686.7 1251.39 1
 5 -1 -1 26166.2 1178.39 2
 -5 1 0 4648.93 393.974 1
 -5 -1 0 4215.46 488.669 1
 5 -1 0 4397.01 483.212 2
 5 -1 1 991.265 229.949 2
 -5 -1 -1 858.101 197.465 1
 -5 1 -1 955.068 187.355 1
 -5 1 -2 115.894 52.2785 1
 5 -1 2 10.3799 40.774 3
 5 -1 3 2069.28 301.383 3
 -5 1 -3 2100.38 271.043 1
 -5 -1 -3 1638.44 272.022 1
 -5 -1 -4 2185.67 312.697 1
 5 -1 4 3055.92 382.675 3
 -5 1 -4 3105.94 326.366 1
 5 -1 5 14357.9 869.595 3
 -5 1 -5 13672.5 681.474 1
 -5 -1 -5 13057.5 820.55 1
 -5 -1 -6 1922.09 305.992 1
 -5 1 -6 2376.6 289.726 1
 5 -1 6 2241.83 360.57 3
 -5 1 -7 1377.29 214.815 1
 5 -1 7 1797.78 332.64 3
 -5 1 -8 2991.88 312.158 1
 5 -1 8 2269.63 390.103 3
 -5 1 -9 542.494 135.474 1
 5 -1 9 307.801 153.538 3
 5 -1 10 3751.25 544.443 3
 -5 1 -10 3619.85 344.63 1
 -5 1 -11 2822.94 303.998 1
 5 -1 11 2081.04 421.888 3
 5 -1 12 904.175 289.935 3
 -5 1 -12 1147.6 192.523 1
 5 -1 13 188.933 162.776 3
 -5 1 -13 184.761 74.0988 1
 5 -1 14 3726.39 613.918 3
 -5 1 -14 3305.95 321.828 1
 5 -1 15 571.241 244.564 3
 -5 1 -15 834.441 159.734 1
 5 1 15 1156.93 370.4 3
 5 -1 16 5332.72 789.778 3
 5 1 16 6168.83 894.275 3
 5 -1 17 2375.34 541.509 3
 5 1 17 2733.4 598.601 3
 5 -1 18 1159.92 398.472 3
 5 1 18 903.996 368.014 3
 5 -1 19 10.4781 133.499 3
 5 1 19 87.4481 156.86 3
 5 -1 20 126.458 199.208 3
 5 1 20 249.525 154.376 3
 5 -1 21 1232.39 448.237 3
 5 1 21 1177.7 441.279 3
 5 -1 22 156.398 188.35 3
 5 1 22 203.444 237.614 3
 5 -1 23 -100.056 147.738 3
 5 1 23 255.192 195.191 3
 5 -1 24 362.187 223.96 3
 5 1 24 618.549 351.607 3
 5 -1 25 615.807 368.561 3
 5 1 25 5.69791 76.8796 3
 5 -2 -27 627.682 329.514 2
 5 -2 -26 -229.216 243.666 2
 5 -2 -25 2060.3 619.988 2
 5 -2 -24 2935.46 708.172 2
 5 -2 -23 816.278 348.752 2
 5 -2 -22 48.7248 71.5969 2
 5 2 -22 483.465 254.093 5
 -5 -2 22 124.258 146.174 4
 5 2 -21 337.517 175.228 5
 5 -2 -21 377.81 245.178 2
 -5 -2 21 212.279 216.282 4
 5 -2 -20 1286.12 435.797 2
 5 2 -20 1243.88 330.909 5
 -5 2 20 1058.9 254.178 1
 -5 -2 20 1331.01 421.543 4
 -5 2 19 805.176 220.112 1
 5 -2 -19 390.572 257.224 2
 5 2 -19 347.582 162.97 5
 -5 -2 19 287.368 198.722 4
 5 2 -18 1866.4 398.93 5
 5 -2 -18 2026.78 539.185 2
 -5 2 18 1953.65 325.865 1
 -5 -2 18 2047.31 523.383 4
 5 -2 -17 281.805 183.62 2
 5 2 -17 529.778 231.889 5
 -5 2 17 342.459 138.431 1
 -5 -2 17 283.116 221.183 4
 -5 -2 16 12044.7 1211.74 4
 -5 2 16 12478.6 754.416 1
 5 -2 -16 11192.8 1167.37 2
 5 2 -16 11976.6 995.229 5
 5 -2 -15 1691.63 441.474 2
 5 2 -15 2370.68 448.545 5
 -5 2 15 2761.71 345.722 1
 -5 -2 15 1840.63 463.622 4
 -5 2 14 144.123 98.8621 1
 5 -2 -14 -29.9834 117.379 2
 5 2 -14 315.821 206.355 5
 -5 -2 14 -37.7369 104.172 4
 -5 2 13 1310.9 232.274 1
 5 -2 -13 953.309 320.991 2
 5 2 -13 1223.38 319.68 5
 -5 -2 13 792.615 299.976 4
 5 2 -12 750.115 264.952 5
 5 -2 -12 890.076 302.453 2
 -5 -2 12 1254.07 371.384 4
 -5 2 12 894.171 204.314 1
 5 -2 -11 78.123 158.676 2
 5 2 -11 253.954 176.068 5
 -5 -2 11 109.943 55.4684 4
 -5 2 11 219.486 116.197 1
 5 2 -10 10974 920.741 5
 -5 -2 10 11440.8 1045.76 4
 -5 2 10 10444.5 645.775 1
 5 -2 -10 11390.8 1082.86 2
 -5 2 9 335.863 151.77 1
 5 -2 -9 155.552 182.482 2
 -5 -2 9 276.207 143.29 4
 5 2 -9 433.153 225.949 5
 5 2 -8 30889.5 1521.45 5
 -5 -2 8 31009.9 1637.66 4
 -5 2 8 34564.5 1176.19 1
 5 -2 -8 32851.1 1782.49 2
 5 2 -7 19798.8 1207.49 5
 -5 2 7 20523.5 912.994 1
 -5 -2 7 19720 1284.42 4
 5 -2 -7 21150 1409.53 2
 5 2 -6 11183.6 894.649 5
 -5 2 6 12343.2 728.156 1
 -5 -2 6 11913.6 986.687 4
 5 -2 -6 11246.6 1022.47 2
 5 2 -5 1184.67 305.223 5
 5 -2 -5 1155.76 321.534 2
 -5 2 5 745.881 181.141 1
 5 -2 -5 1094.5 146.464 4
 5 2 -4 9505.57 797.621 5
 -5 2 4 8841.82 644.253 1
 5 -2 -4 9281.54 530.35 4
 -5 2 3 1156.67 228.467 1
 5 -2 -3 1076.7 197.495 4
 5 2 -3 1255.42 298.257 5
 5 2 -2 292.811 154.439 5
 -5 2 2 95.7822 96.4823 1
 5 -2 -2 578.536 168.885 4
 5 -2 -1 7885.19 412.241 3
 5 2 -1 8263.17 698.39 5
 -5 2 1 7261.1 610.244 1
 5 -2 -1 7782.44 632.706 4
 5 -2 0 267.338 107.999 4
 5 2 0 344.846 153.629 5
 -5 2 0 371.305 107.781 1
 5 -2 0 249.494 82.0467 3
 5 -2 1 1827.65 328.833 4
 5 2 1 2015.88 340.057 5
 -5 2 -1 1988.72 329.2 1
 5 -2 1 1595.13 235.426 3
 5 -2 2 583.87 197.174 4
 5 2 2 788.746 206.416 5
 -5 2 -2 787.172 233.002 1
 5 -2 2 538.754 139.781 3
 5 -2 3 1594.98 319.435 4
 5 2 3 1658.69 293.482 5
 5 -2 3 1557.98 266.6 3
 -5 2 -3 1879.28 334.925 1
 5 -2 4 72.0234 79.9553 4
 5 2 4 94.2661 94.7506 5
 -5 2 -4 96.6206 89.2699 1
 5 -2 4 162.899 110.31 3
 5 2 5 2242.66 307.66 5
 5 -2 5 1900.04 365.63 4
 -5 2 -5 2541.44 392.711 1
 5 -2 5 2023.95 332.736 3
 5 -2 6 324.377 167.241 4
 -5 2 -6 515.259 196.462 1
 5 -2 6 524.572 182.431 3
 5 -2 7 7945.49 728.646 3
 -5 2 -7 6622.27 646.688 1
 5 -2 7 6718.34 728.001 4
 5 -2 8 18877.3 1170.32 3
 -5 2 -8 17772.2 1061.83 1
 5 -2 8 18513.6 1232.55 4
 5 -2 9 2875.6 495.693 4
 -5 2 -9 2319.34 390.08 1
 5 -2 9 2301.33 428.503 3
 -5 2 -10 2069.66 366.576 1
 5 -2 10 1845.36 400.939 3
 -5 2 -11 531.191 175.781 1
 5 -2 11 330.056 171.69 3
 5 -2 12 9301.32 945.651 3
 -5 2 -12 10246.5 799.919 1
 -5 2 -13 9071.33 750.922 1
 5 -2 13 8144.88 924.053 3
 5 -2 14 9420.72 1020.19 3
 -5 2 -14 8657.94 723.858 1
 5 -2 15 4014.2 691.825 3
 -5 2 -15 4800.6 533.425 1
 5 -2 16 3924.77 705.981 3
 -5 2 -16 4540.67 506.63 1
 -5 2 -16 5273.4 978.092 5
 5 -2 17 1004.21 374.675 3
 5 -2 18 1570.93 471.682 3
 5 2 18 1458.85 471.285 3
 5 -2 19 2767.13 630.235 4
 5 -2 19 2738.49 647.946 3
 5 2 19 2985.84 688.99 3
 5 -2 20 4525.4 816.334 4
 5 -2 20 4425.29 830.315 3
 5 2 20 4752.38 871.599 3
 5 -2 21 12.2104 52.9764 4
 5 -2 21 37.0878 167.559 3
 5 2 21 -166.443 215.084 3
 5 -2 22 762.754 351.402 4
 5 -2 22 532.67 303.438 3
 5 2 22 347.326 284.72 3
 5 -2 23 510.548 295.085 4
 5 -2 23 827.223 379.005 3
 5 2 23 1029.26 442.415 3
 5 -2 24 762.233 399.655 4
 5 -2 24 476.119 323.795 3
 5 2 24 27.55 118.31 3
 5 3 -26 -165.541 144.238 5
 5 -3 -26 442.539 287.387 2
 5 3 -25 93.9918 136.386 5
 5 -3 -25 76.1222 90.9229 2
 5 3 -24 479.292 233.269 5
 5 -3 -24 404.257 288.232 2
 5 3 -23 141.399 168.012 5
 5 -3 -23 347.317 329.506 2
 -5 -3 23 -92.0848 146.918 4
 5 3 -22 404.317 257.785 5
 5 -3 -22 -432.445 298.245 2
 -5 -3 22 191.858 168.359 4
 5 3 -21 177.74 169.221 5
 5 -3 -21 72.5349 171.607 2
 -5 -3 21 547.751 336.073 4
 5 3 -20 352.079 225.75 5
 5 -3 -20 430.204 238.984 2
 -5 -3 20 562.233 318.243 4
 -5 3 19 675.478 187.033 1
 5 3 -19 749.457 318.638 5
 5 -3 -19 201.11 84.5786 2
 -5 -3 19 481.401 257.353 4
 -5 3 18 263.217 123.56 1
 5 -3 -18 203.315 216.726 2
 5 3 -18 546.568 260.222 5
 -5 -3 18 234.942 179.315 4
 5 3 -17 12.9643 56.1211 5
 5 -3 -17 -181.61 201.781 2
 -5 -3 17 256.813 174.328 4
 -5 3 17 65.9889 65.9885 1
 5 3 -16 1041.61 377.963 5
 5 -3 -16 421.9 219.667 2
 -5 -3 16 958.636 395.24 4
 -5 3 16 864.631 203.978 1
 5 3 -15 2694.35 556.201 5
 5 -3 -15 2325.49 589.909 2
 -5 3 15 2683.99 351.314 1
 -5 -3 15 3190.47 691.457 4
 5 3 -14 1499.46 452.539 5
 -5 3 14 1475.34 262.296 1
 -5 -3 14 778.443 349.288 4
 5 3 -13 8432.96 991.6 5
 -5 3 13 9513.47 671.045 1
 -5 -3 13 8951.31 1118.3 4
 5 3 -12 64700.1 2686.39 5
 -5 3 12 68137.8 1814.91 1
 -5 -3 12 66229.2 2991.1 4
 5 3 -11 7479.34 913.862 5
 -5 3 11 7528.91 620.304 1
 -5 -3 11 6471.27 924.663 4
 -5 3 10 145.117 48.8308 1
 5 3 -10 559.186 271.525 5
 -5 -3 10 332.162 215.978 4
 5 3 -9 1921.19 477.292 5
 -5 3 9 1749.98 311.295 1
 -5 -3 9 1723.29 473.417 4
 5 3 -8 10842.1 1077.02 5
 -5 3 8 11066.8 806.06 1
 -5 -3 8 11441.2 1174.02 4
 5 3 -7 11163.3 1079.77 5
 -5 3 7 11088.8 824.979 1
 -5 -3 7 12413.3 1196.61 4
 5 3 -6 15009.1 1232.86 5
 -5 3 6 14924.4 1004.93 1
 -5 -3 6 14475.9 1277.39 4
 5 3 -5 6566.65 819.997 5
 -5 3 5 6988.91 707.757 1
 -5 -3 5 6754.06 853.39 4
 5 -3 -5 5991.71 555.591 4
 5 3 -4 2401.68 497.694 5
 -5 3 4 2521.3 434.743 1
 5 -3 -4 2312.05 361.744 4
 5 3 -3 4971.76 688.616 5
 -5 3 3 6220.31 698.092 1
 5 -3 -3 4820.07 563.508 4
 -5 3 2 182.422 137.429 1
 5 3 -2 390.869 227.549 5
 5 -3 -2 91.1544 68.4317 4
 -5 3 1 1927.4 396.21 1
 5 3 -1 1579.8 389.546 5
 5 -3 -1 1781.3 370.888 4
 -5 3 0 200.18 219.05 1
 5 3 0 -26.5886 65.9753 5
 5 -3 0 -43.8724 42.2451 4
 -5 3 -1 705.879 245.538 1
 5 3 1 727.318 252.331 5
 5 -3 1 603.359 223.52 4
 -5 3 -2 193.069 118.02 1
 5 3 2 464.114 200.591 5
 5 -3 2 485.691 229.642 4
 5 3 3 2286.54 421.101 5
 5 -3 3 2823.13 524.999 4
 -5 3 -3 2272.04 474.93 1
 5 3 4 3886.04 532.412 5
 -5 3 -4 3724.01 593.708 1
 5 -3 4 3241.18 575.751 4
 5 -3 5 161.139 63.7778 4
 5 3 5 509.273 215.233 5
 -5 3 -5 229.106 105.502 1
 5 -3 6 2369.78 505.879 4
 5 3 6 1944.24 355.968 5
 -5 3 -6 2057.86 454.935 1
 5 3 7 6667.57 623.517 5
 -5 3 -7 7640.14 870.748 1
 5 -3 7 7039.12 897.715 4
 5 3 8 3464.31 430.365 5
 5 -3 8 3773.06 590.966 3
 5 -3 8 4714.52 744.14 4
 -5 3 -8 3196.85 580.646 1
 5 3 9 11167.5 732.51 5
 5 -3 9 9532.91 956.906 3
 -5 3 -9 12077.6 1111.75 1
 5 -3 9 12133.7 1212.94 4
 5 -3 10 17661.2 1343.86 3
 -5 3 -10 17934.8 1360.27 1
 5 -3 10 18682.2 1527.69 4
 5 3 10 16872.9 846.375 5
 5 -3 11 363.278 260.608 4
 5 -3 11 245.413 171.449 3
 -5 3 -11 219.175 202.366 1
 -5 3 -12 33745.4 1857.88 1
 5 -3 12 29536.3 1843.08 3
 5 -3 12 29832.3 1997.75 4
 5 -3 13 6286.66 872.599 3
 -5 3 -13 7296.42 857.428 1
 5 -3 13 6119.7 926.908 4
 5 -3 14 166.45 187.939 4
 5 -3 14 305.878 186.462 3
 -5 3 -14 581.562 398.597 5
 -5 3 -14 419.475 203.162 1
 5 -3 15 1258.28 418.956 4
 5 -3 15 1404.04 433.298 3
 -5 3 -15 1781.68 684.119 5
 -5 3 -15 1800.76 410.705 1
 -5 3 -16 385.583 194.131 1
 5 -3 16 325.258 180.799 4
 5 -3 16 201.329 151.81 3
 -5 3 -16 266.613 164.503 5
 -5 3 -17 158.968 89.0897 1
 5 -3 17 223.033 209.61 4
 5 -3 17 230.512 157.698 3
 -5 3 -17 7.85178 167.002 5
 5 -3 18 561.383 327.236 4
 5 -3 18 319.429 241.801 3
 5 -3 19 554.266 318.314 4
 5 -3 19 965.177 400.208 3
 5 -3 20 373.807 291.304 4
 5 -3 20 18.7604 138.198 3
 5 -3 21 618.493 339.064 4
 5 -3 21 624.333 337.03 3
 5 3 21 119.616 198.409 3
 5 -3 22 441.612 308.258 4
 5 -3 22 387.347 250.698 3
 5 3 22 868.592 395.691 3
 5 -3 23 171.112 204.078 3
 5 4 -25 313.473 222.945 5
 5 4 -24 198.259 212.347 5
 -5 -4 24 1078.51 492.758 4
 5 4 -23 456.21 258.393 5
 -5 -4 23 -127.024 214.526 4
 5 4 -22 374.586 290.613 5
 -5 -4 22 -78.7118 218.504 4
 5 4 -21 88.5824 114.731 5
 -5 -4 21 254.78 223.249 4
 5 4 -20 360.408 236.506 5
 -5 -4 20 -13.4104 149.068 4
 5 4 -19 349.124 294.26 5
 -5 -4 19 91.2184 97.7152 4
 5 4 -18 -125.179 152.857 5
 -5 4 18 22.7872 75.7765 1
 -5 -4 18 152.281 230.513 4
 5 4 -17 -78.1349 161.093 5
 -5 4 17 183.989 123.444 1
 5 4 -16 311.812 267.862 5
 -5 4 16 4.03539 79.7666 1
 -5 -4 16 260.823 207.566 4
 -5 4 15 62.9811 65.1908 1
 5 4 -15 -238.808 201.463 5
 -5 -4 15 -64.6761 163.093 4
 5 4 -14 1549.15 477.941 5
 -5 4 14 1535.23 299.97 1
 -5 -4 14 1113.02 462.994 4
 5 4 -13 7148.92 1045.46 5
 -5 4 13 7257.34 681.757 1
 -5 -4 13 7083.86 1100.86 4
 5 4 -12 6689.52 998.83 5
 -5 4 12 5302.94 600.585 1
 -5 -4 12 5182.62 934.684 4
 5 4 -11 2684.54 643.021 5
 -5 4 11 2061.53 390.69 1
 -5 -4 11 1978.26 585.442 4
 5 4 -10 837.823 332.604 5
 -5 4 10 1080.84 283.99 1
 -5 -4 10 1511.63 482.574 4
 -5 4 9 404.581 186.644 1
 5 4 -9 257.076 207.711 5
 -5 -4 9 177.834 93.1609 4
 -5 4 8 2229.8 449.196 1
 5 4 -8 2845.93 641.713 5
 -5 -4 8 2370.9 595.766 4
 -5 4 7 275.982 178.389 1
 5 4 -7 199.584 88.0996 5
 -5 -4 7 -59.706 147.352 4
 5 4 -6 3039.22 648.726 5
 -5 -4 6 2539 606.904 4
 -5 4 6 3332.36 576.793 1
 -5 4 5 993.402 314.806 1
 5 4 -5 873.461 351.089 5
 -5 -4 5 264.047 178.296 4
 5 -4 -5 776.678 247.246 4
 -5 4 4 948.523 332.989 1
 5 4 -4 1307.26 386.909 5
 -5 -4 4 1550.41 440.543 4
 5 -4 -4 1631.21 378.853 4
 5 4 -3 1787.93 467.586 5
 5 -4 -3 1553.9 378.812 4
 -5 4 3 1540.47 418.587 1
 5 4 -2 3437.21 663.074 5
 5 -4 -2 2383.36 488.22 4
 -5 4 2 2892.67 596.034 1
 5 4 -1 897.31 345.43 5
 5 -4 -1 800.34 287.5 4
 -5 4 1 1187.08 377.51 1
 5 4 0 4183.82 719.377 5
 5 -4 0 4566.14 714.283 4
 -5 4 0 4202.69 740.959 1
 5 4 1 167.592 146.902 5
 5 -4 1 405.835 217.16 4
 -5 4 -1 322.276 244.775 1
 5 4 2 184.635 175.162 5
 5 -4 2 234.219 209.905 4
 -5 4 -2 348.749 191.668 1
 5 4 3 1247.52 383.46 5
 -5 4 -3 591.493 270.887 1
 5 -4 3 575.586 314.391 4
 5 4 4 450.694 207.062 5
 -5 4 -4 381.515 228.757 1
 5 -4 4 188.408 159.389 4
 5 4 5 2456.3 493.725 5
 -5 4 -5 2434.42 591.764 1
 5 -4 5 2587.87 607.935 4
 5 4 6 187.147 165.653 5
 -5 4 -6 -165.468 270.769 1
 5 -4 6 171.701 143.941 4
 5 4 7 1185.56 323.235 5
 -5 4 -7 1072.27 337.126 1
 5 -4 7 786.322 349.057 4
 5 4 8 334.287 193.018 5
 -5 4 -8 105.091 158.752 1
 5 -4 8 151.479 191.027 4
 5 4 9 1134.6 305.737 5
 -5 4 -9 2691.67 635.017 1
 5 -4 9 1793.07 512.334 4
 -5 4 -10 313.181 148.431 1
 5 -4 10 972.444 420.622 4
 -5 4 -11 -91.3968 165.887 5
 -5 4 -11 -383.381 284.621 1
 5 -4 11 178.715 183.147 4
 -5 4 -12 -42.9627 164.405 5
 -5 4 -12 -175.25 279.676 1
 5 -4 12 -103.198 147.174 4
 -5 4 -13 30.6312 275.705 5
 -5 4 -13 -431.341 263.954 1
 5 -4 13 284.344 238.076 4
 -5 4 -14 31.6719 138.805 1
 5 -4 14 43.2209 93.5709 4
 5 -4 15 399.869 260.834 4
 -5 4 -15 1565.16 721.557 5
 -5 4 -15 1106.55 389.752 1
 5 -4 16 911.341 368.332 4
 -5 4 -16 386.86 422.478 5
 -5 4 -16 1084.52 406.19 1
 5 -4 17 760.564 396.434 4
 -5 4 -17 561.148 389.216 5
 -5 4 -17 541.844 274.308 1
 5 -4 18 668.801 407.301 4
 5 -4 19 425.581 341.921 4
 5 -4 20 1658.73 638.111 4
 -5 -5 22 556.823 392.558 4
 -5 -5 21 391.492 313.118 4
 -5 -5 20 -43.4275 171.964 4
 5 5 -19 1896.82 602.752 5
 -5 -5 19 885.038 450.511 4
 5 5 -18 346.446 251.289 5
 -5 -5 18 206.356 189.562 4
 5 5 -17 -106.972 153.828 5
 -5 -5 17 340.823 322.452 4
 5 5 -16 133.134 207.23 5
 -5 5 16 380.84 174.028 1
 -5 -5 16 783.978 437.587 4
 5 5 -15 197.952 183.928 5
 -5 5 15 16.6264 68.6158 1
 -5 -5 15 143.298 221.474 4
 5 5 -14 378.264 254.001 5
 -5 5 14 267.424 121.513 1
 -5 -5 14 802.482 438.483 4
 5 5 -13 321.626 268.235 5
 -5 5 13 133.695 144.284 1
 -5 -5 13 44.4844 154.191 4
 -5 5 12 2703.25 518.344 1
 5 5 -12 1576.46 568.733 5
 -5 -5 12 1961.56 637.299 4
 -5 5 11 32.0678 76.4841 1
 -5 -5 11 51.6267 97.4822 4
 -5 5 10 72.9186 104.206 1
 5 5 -10 21.0371 191.328 5
 -5 -5 10 -126.858 257.197 4
 -5 5 9 333.031 209.041 1
 5 5 -9 64.5727 135.491 5
 -5 -5 9 348.189 289.467 4
 5 5 -8 100.754 137.226 5
 -5 -5 8 126.849 106.434 4
 -5 5 7 1837.33 494.581 1
 5 5 -7 1548.8 530.824 5
 -5 -5 7 1532.12 535.316 4
 -5 5 6 355.423 220.916 1
 5 5 -6 639.009 372.481 5
 -5 -5 6 76.9177 158.545 4
 5 5 -5 387.124 229.996 5
 -5 -5 5 639.084 286.709 4
 -5 5 5 854.726 337.169 1
 5 5 -4 271.115 205.326 5
 -5 5 4 285.72 181.094 1
 5 5 -3 1049.62 423.902 5
 -5 5 3 1551.61 499.066 1
 5 5 -2 1246.03 450.682 5
 5 -5 -2 1644.06 469.183 4
 -5 5 2 1808.12 560.632 1
 5 5 -1 82.5103 149.459 5
 5 -5 -1 151.113 148.287 4
 -5 5 1 165.697 106.216 1
 5 5 0 2794.29 663.044 5
 5 -5 0 3401.31 695.035 4
 -5 5 0 2886.74 709.103 1
 5 5 1 271.787 238.636 5
 5 -5 1 355.524 262.017 4
 -5 5 -1 363.388 200.899 1
 5 5 2 696.02 316.474 5
 -5 5 -2 973.109 401.044 1
 5 -5 2 873.424 349.422 4
 5 5 3 313.87 219.264 5
 -5 5 -3 0.45356 187.988 1
 5 -5 3 39.4548 65.6088 4
 5 5 4 123.827 159.518 5
 -5 5 -4 -122.275 266.732 1
 5 -5 4 312.154 260.624 4
 5 5 5 -133.76 85.3016 5
 5 -5 5 130.894 168.368 4
 5 5 6 67.4688 131.372 5
 5 -5 6 254.001 250.793 4
 5 5 7 169.911 126.197 5
 5 -5 7 320.209 222.098 4
 5 5 8 473.664 253.081 5
 -5 5 -8 740.542 575.537 5
 5 -5 8 700.525 340.906 4
 -5 5 -9 461.236 421.485 5
 5 -5 9 194.643 167.82 4
 -5 5 -10 1482.22 820.047 5
 5 -5 10 1681.84 582.923 4
 -5 5 -11 421.232 446.536 5
 5 -5 11 272.38 215.281 4
 -5 5 -12 4508.49 1351.1 5
 5 -5 12 2957.86 779.694 4
 -5 5 -13 775.927 516.825 5
 5 -5 13 1039.95 437.511 4
 -5 5 -14 254.957 175.328 1
 -5 5 -14 261.798 443.984 5
 5 -5 14 803.563 413.704 4
 -5 5 -15 -384.456 303.115 1
 -5 5 -15 147.875 258.241 5
 5 -5 15 370.029 302.77 4
 -5 5 -16 312.379 284.84 1
 -5 5 -16 -127.041 246.866 5
 5 -5 16 244.032 246.147 4
 -5 5 -17 -17.7741 144.891 1
 -5 5 -17 -206.191 298.673 5
 5 -5 17 506.507 422.399 4
 -5 5 -18 286.459 354.341 5
 -5 5 -18 1025.79 447.531 1
 -5 6 15 -353.014 201.574 1
 -5 6 14 112.167 145.854 1
 -5 -6 14 -246.322 249.438 4
 -5 -6 13 266.109 250.455 4
 -5 6 13 -74.9596 68.4104 1
 -5 6 12 2.32692 111.556 1
 5 6 -12 46.9402 71.196 5
 -5 6 11 60.6879 117.861 1
 5 6 -11 185.72 192.008 5
 -5 6 10 3234.32 705.352 1
 5 6 -10 2816.89 787.168 5
 -5 -6 10 2701.11 775.174 4
 -5 6 9 845.339 395.571 1
 5 6 -9 886.488 422.616 5
 -5 -6 9 1106.19 504.223 4
 5 6 -8 -83.4243 121.647 5
 -5 -6 8 191.555 181.726 4
 5 6 -7 2069.11 670.231 5
 -5 -6 7 1779.65 613.411 4
 -5 6 7 3440.99 787.771 1
 5 6 -6 -44.6716 201.158 5
 -5 -6 6 309.321 270.185 4
 -5 6 6 -140.135 253.796 1
 5 6 -5 811.063 397.316 5
 -5 6 5 7296.15 1334.71 1
 5 6 -4 872.561 440.217 5
 -5 6 4 928.078 442.729 1
 5 6 -3 145.018 144.19 5
 -5 6 3 -168.901 329.647 1
 5 6 -2 -105.112 214.837 5
 -5 6 2 -28.12 149.143 1
 5 6 -1 -35.3943 168.339 5
 -5 6 1 654.576 396.48 1
 5 6 0 21.618 198.804 5
 -5 6 0 -41.5755 116.978 1
 5 6 1 -258.948 245.08 5
 -5 6 -1 -29.6171 177.484 1
 -5 6 -1 -136.202 206.512 5
 5 6 2 -451.51 292.171 5
 -5 6 -2 18.4593 244.928 5
 5 -6 2 -131.096 164.052 4
 5 6 3 283.52 312.012 5
 -5 6 -3 122.831 154.703 1
 -5 6 -3 341.161 374.808 5
 5 -6 3 388.713 291.031 4
 5 6 4 104.317 164.382 5
 -5 6 -4 -89.1799 245.465 5
 5 -6 4 -138.635 175.363 4
 5 6 5 321.005 244.982 5
 -5 6 -5 1306.19 788.345 5
 5 -6 5 495.08 325.231 4
 5 6 6 381.363 284.885 5
 -5 6 -6 293.763 361.612 5
 5 -6 6 314.812 298.939 4
 -5 6 -7 607.683 521.386 5
 5 -6 7 1289.07 540.288 4
 -5 6 -8 -263.914 386.249 5
 5 -6 8 355.28 279.83 4
 -5 6 -9 997.364 698.369 5
 5 -6 9 143.044 192.808 4
 -5 6 -10 874.437 669.24 5
 5 -6 10 463.062 236.47 4
 -5 6 -11 -410.828 459.565 5
 5 -6 11 220.106 242.536 4
 5 -6 12 753.263 479.886 4
 5 -6 13 -99.869 176.051 4
 5 7 0 -349.998 288.933 5
 5 7 1 2.12608 96.833 5
 5 7 2 89.8882 118.358 5
 5 7 3 140.061 175.527 5
 6 0 -27 123.507 184.371 2
 6 0 -26 206.775 183.479 2
 6 0 -25 -66.265 78.1411 2
 6 0 -24 91.6025 102.5 2
 6 0 -23 33.8544 67.5187 2
 6 0 -22 -2.78583 90.657 2
 6 0 -21 66.3094 120.028 2
 6 0 -20 677.325 250.295 2
 6 0 -19 289.942 199.608 2
 6 0 -18 23834 1314.15 2
 6 0 -17 474.499 206.609 2
 6 0 -16 199.916 129.13 2
 6 0 -15 123.855 116.059 2
 6 0 -14 103.603 106.527 2
 -6 0 14 125.024 129.188 1
 -6 0 13 -415.385 270.635 1
 6 0 -13 121.651 102.152 2
 6 0 -12 3207.64 427.829 2
 -6 0 12 2500.64 447.674 1
 -6 0 11 -187.483 158.439 1
 6 0 -11 142.703 115.786 2
 -6 0 10 1023.12 247.647 1
 -6 0 9 -37.7594 101.869 1
 6 0 -8 47733.9 995.907 4
 -6 0 8 50882.2 1733.78 1
 -6 0 7 56.5846 117.262 1
 6 0 -7 -15.478 46.3293 4
 6 0 -6 10563.4 610.719 4
 6 0 -6 11940 684.538 2
 -6 0 6 9302.19 729.059 1
 -6 0 5 173.957 135.942 1
 6 0 -5 113.402 96.7987 2
 6 0 -5 -70.2986 56.4066 4
 6 0 -4 40157.3 1336.62 4
 6 0 -4 42886.7 1219.09 2
 -6 0 4 40420.8 1423.12 1
 6 0 -3 264.511 123.207 2
 -6 0 3 134.329 128.786 1
 6 0 -2 19128.7 788.861 2
 -6 0 2 20572.4 971.073 1
 -6 0 1 269.818 148.584 1
 6 0 -1 21.2658 42.5445 2
 -6 0 0 1217.4 243.252 1
 6 0 0 1143.81 191.694 2
 -6 0 -1 97.61 98.9166 1
 6 0 1 -3.40528 30.8609 2
 -6 0 -2 7647.83 571.488 1
 6 0 2 6810.92 472.87 2
 6 0 3 6.39202 19.6392 2
 -6 0 -3 111.211 111.848 1
 -6 0 -4 2363.05 310.766 1
 6 0 4 2632.87 279.727 2
 6 0 5 -18.044 27.0539 2
 -6 0 -5 220.001 119.726 1
 -6 0 -6 14636.6 756.608 1
 -6 0 -7 77.3661 81.5431 1
 -6 0 -8 1427.99 241.98 1
 -6 0 -9 58.215 85.0915 1
 -6 0 -10 218.958 118.805 1
 6 0 10 103.497 105.239 3
 6 0 11 -167.461 134.141 3
 -6 0 -11 117.741 94.3628 1
 6 0 12 1154.48 379.419 3
 -6 0 -12 1058.15 231.86 1
 6 0 13 20.5588 51.6733 3
 -6 0 -13 61.3264 96.7528 1
 6 0 14 28174.2 1812.39 3
 6 0 15 136.511 112.379 3
 6 0 16 608.862 278.552 3
 6 0 17 77.7178 186.563 3
 6 0 18 1952.81 542.109 3
 6 0 19 7.77349 75.2397 3
 6 0 20 3250.49 719.994 3
 6 0 21 -34.4434 70.6951 3
 6 0 22 -161.8 246.313 3
 6 0 23 -220.108 206.587 3
 6 0 24 197.666 184.487 3
 6 -1 -27 2887.24 705.527 2
 6 1 -27 3300.93 598.222 2
 6 -1 -26 1492.53 509.638 2
 6 1 -26 1103.52 331.623 2
 6 -1 -25 367.705 266.436 2
 6 1 -25 491.781 213.314 2
 6 -1 -24 288.216 211.511 2
 6 -1 -23 179.481 213.366 2
 6 -1 -22 406.284 189.008 2
 6 -1 -21 90.1642 105.418 2
 6 -1 -20 -120.724 144.439 2
 -6 1 20 -132.188 172.543 1
 6 -1 -19 667.185 287.318 2
 -6 1 19 518.857 213.463 1
 6 -1 -18 110.621 186.107 2
 -6 1 18 -136.103 178.61 1
 6 -1 -17 372.077 212.897 2
 -6 1 17 145.611 138.72 1
 6 -1 -16 675.592 263.631 2
 -6 1 16 461.331 149.786 1
 6 -1 -15 31.0483 120.571 2
 -6 1 15 50.3311 75.4425 1
 -6 -1 15 75.8744 81.6002 4
 6 -1 -14 51.1983 44.6429 2
 -6 1 14 368.352 170.564 1
 -6 -1 14 366.641 176.354 4
 -6 -1 13 3700 499.726 4
 -6 1 13 5292.4 558.077 1
 6 -1 -13 3473.06 547.189 2
 6 -1 -12 3216.8 511.945 2
 -6 -1 12 3547.14 472.24 4
 -6 1 12 3574.05 452.616 1
 -6 -1 11 6498.05 624.896 4
 -6 1 11 6695.43 589.428 1
 6 -1 -11 7128.78 756.033 2
 -6 -1 10 4339.5 516.613 4
 -6 1 10 5125.88 501.166 1
 6 -1 -10 4280.72 582.187 2
 6 -1 -9 621.965 212.36 2
 -6 1 9 355.13 157.628 1
 6 -1 -8 1121.58 296.968 2
 -6 1 8 1281.18 242.444 1
 6 -1 -7 1923.14 367.796 2
 -6 1 7 2345.59 322.58 1
 -6 1 6 13287 758.08 1
 6 -1 -6 13577.3 974.884 2
 -6 1 5 4287.61 423.162 1
 6 -1 -5 3794.92 502.912 2
 -6 1 4 303.695 132.911 1
 6 -1 -4 62.1867 33.397 4
 6 -1 -4 29.784 87.0279 2
 6 -1 -4 95.5566 47.6066 4
 -6 1 3 6021.49 487.561 1
 6 -1 -3 5728.23 601.052 2
 6 -1 -2 319.296 135.729 2
 -6 -1 2 99.1781 173.256 1
 -6 1 2 527.219 159.049 1
 -6 1 1 2901.86 333.486 1
 -6 -1 1 2639.2 404.999 1
 6 -1 -1 2849.9 422.456 2
 6 -1 0 169.327 126.935 2
 -6 1 0 102.265 97.2995 1
 -6 -1 0 -60.165 184.116 1
 -6 1 -1 25650 990.083 1
 -6 -1 -1 24658.5 1282.8 1
 6 -1 1 26049.7 1251.28 2
 -6 1 -2 32196.2 1101.01 1
 -6 -1 -2 30900.2 1413.8 1
 6 -1 3 9976.53 717.079 3
 -6 1 -3 9686.38 611.344 1
 -6 -1 -3 9325.03 763.479 1
 6 -1 4 1188.4 262.535 3
 -6 1 -4 1525.4 245.416 1
 -6 -1 -4 796.888 223.135 1
 6 -1 5 19197.2 1078.63 3
 -6 1 -5 19370.3 850.66 1
 -6 -1 -5 18223.5 1063.39 1
 -6 -1 -6 111.94 94.1243 1
 6 -1 6 254.975 136.977 3
 -6 1 -6 492.384 160.037 1
 6 -1 7 3422.97 493.455 3
 -6 -1 -7 3153.89 438.981 1
 -6 1 -7 3403.69 356.493 1
 6 1 7 2835.46 164.627 2
 6 -1 8 10135.6 878.288 3
 -6 1 -8 10167 612.447 1
 6 -1 9 -54.7043 63.5069 3
 -6 1 -9 73.1929 79.2587 1
 6 -1 10 1192.29 328.409 3
 -6 1 -10 1162.25 209.136 1
 6 -1 11 280.671 153.158 3
 -6 1 -11 93.3662 72.927 1
 6 -1 12 444.605 205.754 3
 -6 1 -12 447.852 132.535 1
 6 -1 13 875.745 320.817 3
 -6 1 -13 1249.01 210.28 1
 6 -1 14 108.11 100.699 3
 -6 1 -14 141.108 75.3228 1
 6 -1 15 3108.41 606.951 3
 6 1 15 2903.09 600.15 3
 6 -1 16 2221.02 525.853 3
 6 1 16 2442.52 579.355 3
 6 -1 17 325.884 154.102 3
 6 1 17 553.923 283.639 3
 6 -1 18 -45.9243 172.718 3
 6 1 18 161.946 168.574 3
 6 -1 19 465.18 273.365 3
 6 1 19 236.378 197.362 3
 6 -1 20 443.952 283.336 3
 6 1 20 192.093 230.692 3
 6 -1 21 1617.97 516.441 3
 6 1 21 1830.39 567.447 3
 6 -1 22 156.932 183.788 3
 6 1 22 129.069 168.292 3
 6 -1 23 -82.5858 91.0725 3
 6 1 23 -145.614 182.17 3
 6 -1 24 520.427 352.921 3
 6 -2 -26 59.3627 171.329 2
 6 -2 -25 -55.5928 124.305 2
 6 -2 -24 475.149 268.361 2
 6 -2 -23 76.1396 191.414 2
 6 -2 -22 40.7644 79.9859 2
 6 -2 -21 -68.5389 211.568 2
 -6 2 21 99.0103 59.1807 1
 6 -2 -20 258.533 167.163 2
 -6 2 20 257.049 119.03 1
 6 -2 -19 -73.4347 173.008 2
 -6 2 19 20.4221 72.5181 1
 6 -2 -18 1.05155 145.42 2
 -6 2 18 49.6965 90.9573 1
 6 2 -17 7525.68 788.812 5
 -6 -2 17 7514.99 962.967 4
 -6 2 17 6988.91 650.355 1
 6 -2 -17 6563.54 952.464 2
 6 2 -16 514.308 233.684 5
 6 -2 -16 331.484 235.032 2
 -6 2 16 430.248 195.014 1
 -6 -2 16 174.214 153.379 4
 6 -2 -15 1440.1 428.686 2
 6 2 -15 1542.58 367.767 5
 -6 2 15 1856.26 331.469 1
 -6 -2 15 1983.94 473.802 4
 6 -2 -14 970.89 372.537 2
 6 2 -14 2216.92 431.356 5
 -6 2 14 2302.34 348.64 1
 -6 -2 14 2109.07 479.642 4
 -6 2 13 1810.19 300.161 1
 6 -2 -13 1742.66 462.536 2
 6 2 -13 2392.9 440.452 5
 -6 -2 13 1294.77 354.33 4
 6 2 -12 18382.7 1202.49 5
 -6 -2 12 17295.8 1309.99 4
 -6 2 12 18299.3 928.152 1
 6 -2 -12 19210.7 1506.77 2
 -6 -2 11 39495.1 1938.95 4
 -6 2 11 43615.7 1417.06 1
 6 -2 -11 42751 2219.81 2
 6 2 -11 43863.7 1840.33 5
 6 2 -10 50972.1 1959.52 5
 -6 -2 10 48968.9 2117.28 4
 -6 2 10 50962.9 1518.63 1
 6 -2 -10 49662.7 2380.41 2
 6 -2 -9 3525.18 632.903 2
 6 2 -9 3503.29 512.441 5
 -6 2 9 3718.18 414.556 1
 -6 -2 9 3469.35 557.522 4
 6 2 -8 3526.06 520.27 5
 -6 2 8 4003.07 433.792 1
 6 -2 -8 4113.06 684.579 2
 6 2 -7 21556.9 1239.56 5
 -6 2 7 22221.4 1007.75 1
 6 -2 -7 22284.6 1528.7 2
 6 2 -6 286.401 190.792 5
 6 -2 -6 365.502 251.505 2
 -6 2 6 356.998 158.59 1
 -6 2 5 9222.05 652.855 1
 6 -2 -5 8453.02 916.562 2
 6 2 -5 8954.51 770.023 5
 6 2 -4 6971.93 675.859 5
 -6 2 4 7916.35 611.531 1
 6 -2 -4 7810.87 466.121 4
 6 -2 -4 7920.29 872.741 2
 6 2 -3 1560.31 322.893 5
 -6 2 3 1260.18 247.606 1
 6 -2 -3 1340.24 228.618 4
 6 2 -2 2886.71 429.149 5
 6 -2 -2 2491.42 211.273 3
 -6 2 2 3119.14 386.872 1
 6 -2 -2 2822.28 365.638 4
 6 -2 -1 5183.43 361.351 3
 -6 2 1 5256.25 510.747 1
 6 -2 -1 5545.22 555.85 4
 6 2 -1 5477.81 573.938 5
 6 -2 0 1828.04 331.692 4
 6 2 0 1923.44 330.207 5
 6 -2 0 2084.33 256.465 3
 -6 2 0 1935.71 306.605 1
 6 -2 1 203.284 123.474 4
 6 -2 1 230.532 97.3153 3
 -6 2 -1 137.059 71.4409 1
 -6 2 -2 4455.73 479.897 1
 6 -2 2 4732.73 554.401 4
 6 -2 2 4478.99 436.957 3
 6 -2 3 2959.8 378.687 3
 6 -2 3 2511.79 414.883 4
 -6 2 -3 2610.4 365.492 1
 6 -2 4 1557.22 329.33 4
 -6 2 -4 1547.78 290.321 1
 6 -2 4 1446.1 283.863 3
 -6 2 -5 3317.38 431.413 1
 6 -2 5 3512.79 513.782 4
 6 -2 5 3031.78 430.514 3
 6 -2 6 10898.8 852.564 3
 -6 2 -6 11161.1 779.164 1
 6 -2 6 10836.1 928.092 4
 6 -2 7 37030.7 1627.09 3
 -6 2 -7 38472.7 1465.27 1
 6 -2 7 38896.2 1791.47 4
 6 -2 8 3242.95 506.62 3
 -6 2 -8 4051.42 473.481 1
 6 -2 8 3566.4 559.093 4
 6 -2 9 3074.38 511.375 3
 -6 2 -9 3280.36 424.929 1
 6 -2 10 6832.69 783.832 3
 -6 2 -10 6447.47 597.397 1
 -6 2 -11 694.519 193.51 1
 6 -2 11 835.608 280.132 3
 6 -2 12 3001.53 564.635 3
 -6 2 -12 3453.28 428.772 1
 -6 2 -13 6408.91 580.707 1
 6 -2 13 5363 763.67 3
 -6 2 -14 556.402 176.645 1
 6 -2 14 552.713 267.518 3
 6 -2 15 1091.76 378.165 3
 -6 2 -15 763.488 192.487 1
 6 -2 16 485.203 252.584 3
 6 -2 17 130.921 179.237 3
 6 -2 18 478.459 277.235 3
 6 -2 19 241.83 244.672 3
 6 2 19 158.232 239.751 3
 6 -2 20 96.7577 60.5227 4
 6 -2 20 -65.5471 90.397 3
 6 -2 21 449.466 291.829 4
 6 -2 21 69.9769 119.459 3
 6 -2 22 268.281 222.292 4
 6 -2 22 624.834 326.515 3
 6 2 22 702.014 372.808 3
 6 -2 23 -230.245 220.25 3
 6 3 -24 916.556 322.449 5
 6 -3 -24 750.502 408.002 2
 6 3 -23 835.346 305.867 5
 6 -3 -23 333.995 268.974 2
 6 3 -22 315.427 223.813 5
 6 -3 -22 456.632 290.585 2
 6 3 -21 173.913 157.276 5
 6 -3 -21 -39.957 144.884 2
 6 3 -20 1308.17 402.343 5
 6 -3 -20 1759.2 576.986 2
 -6 3 20 1653.08 320.536 1
 6 3 -19 62.4713 91.0617 5
 6 -3 -19 -189.985 225.138 2
 -6 3 19 145.362 117.826 1
 -6 -3 19 109.605 233.011 4
 6 3 -18 301.969 216.098 5
 -6 3 18 645.855 197.97 1
 6 -3 -18 719.944 366.416 2
 -6 -3 18 742.313 362.827 4
 -6 3 17 21.0488 54.8392 1
 6 3 -17 148.707 190.118 5
 6 -3 -17 -16.1832 106.243 2
 -6 -3 17 109.344 64.3446 4
 6 3 -16 3326.21 601.774 5
 6 -3 -16 2604.19 644.456 2
 -6 3 16 3559.55 431.752 1
 -6 -3 16 3077 694.847 4
 6 3 -15 3366.98 607.658 5
 6 -3 -15 3576.42 765.048 2
 -6 3 15 3856.66 447.464 1
 -6 -3 15 3630.12 754.557 4
 6 3 -14 1650.13 433.267 5
 6 -3 -14 796.432 348.526 2
 -6 -3 14 1043.34 405.322 4
 -6 3 14 1167.16 260.991 1
 6 3 -13 4087.45 674.874 5
 -6 3 13 4941.06 511.314 1
 -6 -3 13 4199.68 764.821 4
 6 3 -12 12262.2 1137.81 5
 -6 -3 12 13516.7 1354.03 4
 -6 3 12 13006.5 825.326 1
 6 3 -11 4567.64 699.581 5
 -6 3 11 4687.35 506.078 1
 -6 -3 11 3815.11 703.969 4
 6 3 -10 14200.9 1209.54 5
 -6 -3 10 14613 1355.08 4
 -6 3 10 14332 884.203 1
 6 3 -9 15398.2 1246.65 5
 -6 3 9 19129.5 1036.93 1
 -6 -3 9 18012.3 1484.56 4
 6 3 -8 2040.28 466.921 5
 -6 3 8 1472.16 296.873 1
 -6 -3 8 1268.81 368.681 4
 6 3 -7 2774.43 538.313 5
 -6 3 7 2195.88 364.49 1
 -6 -3 7 2791.3 552.401 4
 6 3 -6 10950.8 1033.93 5
 -6 3 6 8808.18 740.206 1
 6 3 -5 406.613 267.782 5
 -6 3 5 -303.875 181.292 1
 6 3 -4 607.779 281.392 5
 -6 3 4 -149.143 141.488 1
 -6 3 3 3157.04 458.553 1
 6 -3 -3 3381.27 457.706 4
 6 3 -3 3606.58 583.569 5
 6 3 -2 5938.22 728.979 5
 -6 3 2 6125.1 664.292 1
 6 -3 -2 6148.99 658.118 4
 6 3 -1 11403.8 973.409 5
 -6 3 1 10833.9 912.423 1
 6 -3 -1 12474.1 989.546 4
 -6 3 0 4706.34 610.377 1
 6 -3 0 4375.52 612.829 4
 6 3 0 4691.37 619.874 5
 6 3 1 2164.7 412.811 5
 -6 3 -1 2290.62 448.309 1
 6 -3 1 1929.71 417.841 4
 6 3 2 125.886 125.929 5
 -6 3 -2 81.1165 108.152 1
 6 -3 2 219.399 188.621 4
 -6 3 -3 1613.5 370.56 1
 6 3 3 1131.46 294.339 5
 6 -3 3 1427.25 382.986 4
 -6 3 -4 451.287 232.76 1
 6 3 4 202.255 144.037 5
 6 -3 4 885.284 310.414 4
 6 -3 5 -28.6272 79.8562 4
 -6 3 -5 295.536 180.886 1
 6 3 5 266.72 146.897 5
 6 -3 6 3568.09 635.053 4
 6 3 6 3903.76 482.139 5
 6 -3 6 3651.42 540.734 3
 -6 3 -6 4178.51 610.6 1
 6 -3 7 148.241 125.834 4
 6 3 7 127.373 109.83 5
 -6 3 -7 178.016 171.836 1
 6 -3 7 130.327 119.488 3
 6 -3 8 9753.69 945.832 3
 -6 3 -8 11591.3 1024.63 1
 6 -3 8 11262.6 1163.56 4
 6 -3 9 126.019 155.934 4
 -6 3 -9 90.2368 135.143 1
 6 -3 9 40.9385 106.144 3
 6 -3 10 2457.99 568.52 4
 -6 3 -10 3339.75 550.302 1
 6 -3 10 2723.96 530.721 3
 6 -3 11 2860.7 624.713 4
 -6 3 -11 3726.72 581.22 1
 6 -3 11 3133.4 591.833 3
 6 -3 12 5648.45 816.679 3
 -6 3 -12 6439.97 769.054 1
 6 -3 12 6325.02 941.529 4
 6 -3 13 549.969 301.768 4
 -6 3 -13 316.033 159.926 1
 6 -3 13 237.727 172.518 3
 6 -3 14 545.625 288.78 4
 -6 3 -14 362.891 179.571 1
 6 -3 14 -32.6406 104.513 3
 6 -3 15 165.554 137.553 4
 -6 3 -15 246.596 166.486 1
 6 -3 15 32.4661 113.529 3
 6 -3 16 253.764 210.547 4
 -6 3 -16 115.943 132.221 1
 6 -3 16 454.521 279.262 3
 6 -3 17 2259.73 585.7 3
 6 -3 17 1496.79 502.346 4
 6 -3 18 490.928 326.646 4
 6 -3 18 25.802 99.3807 3
 6 -3 19 213.659 240.35 4
 6 -3 19 131.993 121.17 3
 6 -3 20 -78.6436 159.474 4
 6 -3 20 -7.05639 123.905 3
 6 -3 21 201.526 219.376 4
 6 -3 21 -87.6721 168.45 3
 6 -3 22 1274.85 501.13 3
 6 4 -22 511.356 251.903 5
 6 4 -21 162.432 161.424 5
 -6 -4 21 -82.2632 146.131 4
 6 4 -20 107.667 135.576 5
 -6 -4 20 810.339 441.674 4
 6 4 -19 359.382 246.725 5
 -6 -4 19 35.9925 198.885 4
 6 4 -18 1273.08 428.693 5
 -6 -4 18 641.913 396.546 4
 -6 4 18 1126.98 266.53 1
 6 4 -17 278.187 212.112 5
 -6 -4 17 -144.563 254.586 4
 -6 4 17 224.314 148.056 1
 6 4 -16 945.258 365.814 5
 -6 4 16 1183.79 266.632 1
 -6 -4 16 1263.62 494.985 4
 6 4 -15 413.489 255.959 5
 -6 4 15 333.454 149.842 1
 -6 -4 15 214.93 147.146 4
 6 4 -14 716.343 364.7 5
 -6 4 14 550.647 193.165 1
 -6 -4 14 632.465 390.886 4
 6 4 -13 916.261 350.742 5
 -6 4 13 703.89 221.55 1
 -6 -4 13 575.884 294.232 4
 6 4 -12 1765.65 490.648 5
 -6 4 12 1831.47 345.944 1
 -6 -4 12 2317.4 634.197 4
 6 4 -11 2937.2 634.708 5
 -6 4 11 3506.15 497.564 1
 -6 -4 11 2756.31 676.38 4
 -6 4 10 678.854 215.255 1
 6 4 -10 1162.54 411.897 5
 -6 -4 10 1032.98 388.599 4
 6 4 -9 99.9604 181.112 5
 -6 4 9 -123.836 172.811 1
 -6 -4 9 46.9613 197.914 4
 6 4 -8 858.266 344.337 5
 -6 4 8 906.024 275.756 1
 -6 -4 8 468.639 228.788 4
 6 4 -7 367.739 214.082 5
 -6 4 7 439.135 169.232 1
 -6 -4 7 320.638 157.84 4
 -6 4 6 1345.01 353.239 1
 6 4 -6 1380.58 418.41 5
 6 4 -5 500.347 255.322 5
 -6 4 5 420.063 226.415 1
 -6 4 4 1994.17 449.827 1
 6 4 -4 1225.28 387.467 5
 -6 4 3 126.22 129.114 1
 6 4 -3 94.5075 123.401 5
 -6 4 2 40.1334 173.847 1
 6 4 -2 291.372 203.319 5
 -6 4 1 213.436 150.431 1
 6 4 -1 226.83 190.641 5
 6 4 0 4699.56 726.428 5
 -6 4 0 5011.63 759.922 1
 6 -4 0 3672.04 635.971 4
 -6 4 -1 1248.55 391.481 1
 6 4 1 1886.14 449.711 5
 6 -4 1 1081.59 346.028 4
 -6 4 -2 -39.0282 161.255 1
 6 4 2 -7.92707 68.1876 5
 6 -4 2 -6.72619 117.227 4
 -6 4 -3 316.771 215.05 1
 6 4 3 386.127 187.326 5
 6 -4 3 269.85 164.231 4
 -6 4 -4 -38.4222 137.507 1
 6 -4 4 39.5813 65.2162 4
 -6 4 -5 2064.77 524.573 1
 6 4 5 1723.14 404.385 5
 6 -4 5 2051.01 534.031 4
 -6 4 -6 194.034 193.055 1
 6 4 6 122.762 159.724 5
 6 -4 6 -26.8534 91.1645 4
 -6 4 -7 2244.11 535.567 1
 6 4 7 1950.83 394.756 5
 6 -4 7 2447.46 620.903 4
 -6 4 -8 1056.02 395.938 1
 6 4 8 765.638 243.55 5
 6 -4 8 649.594 320.812 4
 -6 4 -9 4849.2 810.172 1
 6 -4 9 4409.25 850.003 4
 -6 4 -10 4138.92 753.104 1
 6 -4 10 4229.79 849.102 4
 -6 4 -11 8824.82 1085.34 1
 6 -4 11 7084.08 1102.68 4
 -6 4 -12 167.099 145.539 1
 6 -4 12 205.6 202.707 4
 6 -4 13 55.523 112.089 4
 -6 4 -13 416.912 258.501 1
 -6 4 -13 -203.256 296.926 5
 6 -4 14 11.6401 74.1989 4
 -6 4 -14 -347.716 223.382 1
 -6 4 -14 -233.347 297.697 5
 6 -4 15 67.2259 121.437 4
 -6 4 -15 723.205 308.94 1
 -6 4 -15 1118.86 640.538 5
 6 -4 16 -27.2837 108.269 4
 -6 4 -16 -25.2046 116.041 1
 -6 4 -16 -262.227 311.528 5
 6 -4 17 406.764 334.616 4
 6 -4 18 137.294 96.7628 4
 6 -4 19 -17.0162 161.984 4
 -6 -5 20 341.177 229.587 4
 -6 -5 19 1747.64 685.39 4
 -6 -5 18 -71.0348 147.594 4
 -6 5 17 386.999 192.785 1
 -6 -5 17 713.482 432.221 4
 6 5 -16 1050.63 475.766 5
 -6 5 16 1034.9 280.27 1
 -6 -5 16 686.793 382.278 4
 6 5 -15 605.145 357.906 5
 -6 5 15 64.6559 92.7363 1
 -6 -5 15 200.63 297.821 4
 6 5 -14 107.988 157.081 5
 -6 5 14 166.977 138.99 1
 -6 -5 14 277.222 196.426 4
 6 5 -13 132.306 160.479 5
 -6 5 13 -146.566 150.326 1
 -6 -5 13 -99.1475 143.837 4
 6 5 -12 3169.29 754.774 5
 -6 5 12 2141.39 436.384 1
 -6 -5 12 1908.91 625.422 4
 6 5 -11 905.101 431.352 5
 -6 5 11 929.323 274.611 1
 -6 -5 11 803.072 428.804 4
 6 5 -10 601.975 334.579 5
 -6 5 10 59.2325 134.065 1
 -6 -5 10 376.261 261.049 4
 6 5 -9 -39.4837 76.7317 5
 -6 5 9 264.695 151.912 1
 -6 -5 9 554.496 418.292 4
 -6 5 8 1209.64 384.966 1
 6 5 -8 1178.17 458.166 5
 -6 -5 8 226.47 191.797 4
 -6 5 7 5.39101 84.5047 1
 6 5 -7 265.756 270.946 5
 -6 5 6 11.571 117.998 1
 6 5 -6 80.711 166.782 5
 -6 5 5 958.866 372.067 1
 6 5 -5 275.271 175.304 5
 -6 5 4 124.811 187.811 1
 6 5 -4 -61.135 87.848 5
 6 5 -3 234.814 244.865 5
 -6 5 3 209.985 227.304 1
 -6 5 2 998.884 358.19 1
 6 5 -2 856.204 399.488 5
 -6 5 1 1560.35 504.879 1
 6 5 -1 1411.91 452.167 5
 -6 5 0 1705.02 522.25 1
 6 5 0 1486.79 461.732 5
 6 5 1 1163.39 401.83 5
 -6 5 -1 773.68 394.66 1
 6 5 2 1550.4 471.113 5
 -6 5 -2 1858.22 540.526 1
 6 5 3 37.6865 63.5508 5
 -6 5 -3 226.744 210.291 1
 6 5 4 137.351 149.628 5
 6 -5 4 -23.1669 83.8736 4
 -6 5 -4 138.925 189.858 1
 6 5 5 55.0407 136.313 5
 6 -5 5 -23.2876 115.705 4
 -6 5 -5 -110.532 195.711 1
 6 5 6 1217.05 377.686 5
 6 -5 6 1697.75 549.458 4
 -6 5 -6 1289.33 475.93 1
 6 -5 7 502.31 307.137 4
 -6 5 -7 183.987 146.184 1
 6 -5 8 144.847 176.251 4
 -6 5 -8 -34.8854 223.45 1
 6 -5 9 -16.7094 111.043 4
 -6 5 -9 -217.687 321.895 1
 -6 5 -10 964.363 676.72 5
 6 -5 10 509.73 326.876 4
 -6 5 -10 376.936 210.87 1
 -6 5 -11 296.522 382.703 5
 6 -5 11 265.739 269.508 4
 -6 5 -11 231.115 156.915 1
 -6 5 -12 1121.99 690.224 5
 -6 5 -12 435.461 264.625 1
 6 -5 12 547.895 342.462 4
 -6 5 -13 1633.98 899.072 5
 6 -5 13 518.743 324.673 4
 -6 5 -13 1439.43 498.38 1
 -6 5 -14 -482.723 473.324 5
 6 -5 14 -77.1988 153.223 4
 -6 5 -14 -262.582 259.822 1
 -6 5 -15 424.498 439.718 5
 6 -5 15 -4.63414 127.659 4
 -6 5 -15 271.023 237.706 1
 6 -5 16 -157.828 209.625 4
 -6 5 -16 30.6087 110.559 1
 -6 6 14 397 217.881 1
 -6 6 13 -105.364 169.151 1
 -6 6 12 -225.555 198.042 1
 -6 -6 12 83.329 77.4811 4
 -6 6 11 143.626 169.299 1
 -6 -6 11 271.147 261.582 4
 -6 6 10 1279.33 432.769 1
 -6 -6 10 200.508 204.972 4
 -6 6 9 602.139 309.495 1
 -6 -6 9 396.112 298.051 4
 -6 6 8 1506.86 483.356 1
 6 6 -8 840.385 384.275 5
 -6 6 7 1158.59 451.977 1
 6 6 -7 1454.35 553.734 5
 -6 6 6 283.977 318.441 1
 6 6 -6 -185.312 244.455 5
 -6 6 5 81.2529 183.933 1
 6 6 -5 -0.48261 129.473 5
 -6 6 4 64.2265 219.085 1
 6 6 -4 247.787 195.741 5
 -6 6 3 211.765 213.764 1
 6 6 -3 420.317 296.642 5
 -6 6 2 268.944 204.884 1
 6 6 -2 631.664 348.031 5
 6 6 -1 169.067 226.768 5
 -6 6 1 -4.01159 231.475 1
 6 6 0 225.583 239.126 5
 -6 6 0 937.628 472.866 1
 6 6 1 157.057 190.71 5
 -6 6 -1 255.213 259.031 1
 6 6 2 216.888 206.095 5
 -6 6 -2 -268.253 293.972 1
 6 6 3 -56.3624 132.497 5
 -6 6 -3 280.342 277.651 1
 6 6 4 110.417 119.835 5
 -6 6 -4 232.347 240.365 5
 -6 6 -4 -205.023 338.42 1
 6 6 5 258.562 253.238 5
 -6 6 -5 56.4842 139.941 1
 -6 6 -6 2906.42 1204.26 5
 -6 6 -6 1338.47 548.944 1
 6 -6 9 735.769 419.601 4
 6 -6 10 234.29 291.131 4
 6 -6 11 184.069 224.577 4
 7 0 -25 170.411 178.461 2
 7 0 -24 56.9982 148.999 2
 7 0 -23 145.731 134.171 2
 7 0 -22 479.403 224.367 2
 7 0 -21 -35.0631 99.7546 2
 7 0 -20 400.813 198.12 2
 7 0 -19 124.363 147.779 2
 7 0 -18 5186.6 665.744 2
 7 0 -17 123.279 130.375 2
 7 0 -16 826.432 251.996 2
 7 0 -15 127.577 118.486 2
 -7 0 14 2572.09 514.065 1
 7 0 -14 3439.56 492.552 2
 -7 0 13 -703.397 261.983 1
 7 0 -13 -72.3715 49.3202 2
 7 0 -12 700.172 222.04 2
 -7 0 12 446.539 201.046 1
 -7 0 11 -111.211 154.069 1
 7 0 -11 31.7316 87.1336 2
 -7 0 10 3832.71 541.091 1
 7 0 -10 3874.08 468.023 2
 7 0 -9 88.5101 110.987 2
 -7 0 9 -65.5262 82.2465 1
 7 0 -8 24975.9 1138.12 2
 -7 0 8 26706.3 1381.6 1
 7 0 -7 5629.17 539.655 2
 -7 0 7 3404.83 517.072 1
 -7 0 6 2670.78 428.114 1
 7 0 -6 2603.86 358.057 2
 -7 0 5 14.2123 81.2141 1
 7 0 -5 219.77 120.476 2
 -7 0 4 285.395 152.423 1
 7 0 -4 226.601 103.598 2
 -7 0 3 12.1729 127.125 1
 7 0 -3 -35.4642 35.7393 2
 -7 0 2 1924.91 333.407 1
 7 0 -2 1772.8 279.296 2
 -7 0 1 94.7569 102.413 1
 7 0 -1 56.7454 60.1119 2
 7 0 0 543.713 156.366 2
 -7 0 0 478.141 175.691 1
 7 0 1 37.347 58.7439 2
 -7 0 -1 50.1733 99.6095 1
 -7 0 -2 8361.43 669.178 1
 7 0 2 7773.62 590.199 2
 7 0 3 -1.90853 46.5008 2
 -7 0 -3 286.368 147.208 1
 7 0 4 2.72415 32.5346 2
 -7 0 -4 150.476 125.59 1
 -7 0 -5 188.772 128.044 1
 -7 0 -6 610.358 188.851 1
 -7 0 -7 67.1475 94.6569 1
 -7 0 -8 290.825 144.307 1
 -7 0 -9 -42.7949 49.1154 1
 -7 0 -10 113.142 93.4622 1
 7 0 10 -76.6706 120.952 3
 -7 0 -11 -21.6279 62.1698 1
 7 0 11 59.8763 103.561 3
 -7 0 -12 -18.8282 75.9998 1
 7 0 12 209.309 198.971 3
 7 0 13 164.169 217.98 3
 7 0 14 5072.18 802.731 3
 7 0 15 64.3544 51.7443 3
 7 0 16 2050.96 549.356 3
 7 0 17 35.2284 145.119 3
 7 0 18 2511.3 631.523 3
 7 0 19 26.5161 99.591 3
 7 0 20 2581.33 665.291 3
 7 0 21 702.042 371.8 3
 7 0 22 400.982 253.924 3
 7 -1 -25 359.944 254.43 2
 7 1 -25 411.787 214.535 2
 7 -1 -24 93.8157 174.317 2
 7 1 -24 543.527 239.179 2
 7 -1 -23 373.383 256.178 2
 7 1 -23 378.671 201.051 2
 7 -1 -22 -99.0494 59.5375 2
 7 -1 -21 502.61 263.337 2
 7 -1 -20 1314.34 436.798 2
 -7 1 20 1260.41 389.383 1
 7 -1 -19 149.602 177.388 2
 -7 1 19 -720.588 276.897 1
 7 -1 -18 175.425 139.026 2
 -7 1 18 -196.214 197.628 1
 7 -1 -17 1399.07 423.238 2
 -7 1 17 974.824 273.12 1
 7 -1 -16 1002.51 324.936 2
 -7 1 16 1057.06 292.27 1
 7 -1 -15 81.295 130.495 2
 -7 1 15 7.03139 57.1354 1
 7 -1 -14 1442.44 384.247 2
 -7 1 14 1225.48 292.5 1
 7 -1 -13 829.756 277.124 2
 -7 1 13 715.496 214.995 1
 7 -1 -12 -9.29729 71.1975 2
 -7 1 12 67.8698 128.799 1
 7 -1 -11 297.179 182.146 2
 -7 1 11 225.311 144.271 1
 7 -1 -10 164.02 149.868 2
 -7 1 10 150.933 122.374 1
 7 -1 -9 420.355 224.426 2
 -7 1 9 576.218 212.574 1
 7 -1 -8 555.95 226.454 2
 -7 1 8 527.006 194.789 1
 -7 1 7 8201.6 666.707 1
 7 -1 -7 7578.37 788.608 2
 7 -1 -6 3016.01 495.358 2
 -7 1 6 2651.66 380.374 1
 7 -1 -5 871.906 259.914 2
 -7 1 5 500.965 166.374 1
 7 -1 -4 -68.1563 81.236 2
 -7 1 4 -1.98349 64.011 1
 7 -1 -3 47.4792 92.4651 2
 -7 1 3 129.834 131.606 1
 -7 1 2 327.592 146.53 1
 7 -1 -2 126.683 97.8849 2
 -7 -1 2 -245.414 237.25 1
 -7 1 1 1247.14 247.198 1
 -7 -1 1 436.691 111.275 1
 7 -1 -1 1384.32 315.79 2
 7 -1 0 1784.04 358.17 2
 -7 -1 0 1789.43 382.68 1
 -7 1 0 2286.55 328.532 1
 -7 1 -1 9324.29 647.554 1
 -7 -1 -1 8153.53 797.378 1
 7 -1 1 9200.85 795.816 2
 -7 -1 -2 2973.15 467.587 1
 -7 1 -2 3474.65 401.576 1
 -7 -1 -3 850.981 223.558 1
 7 -1 3 1261.63 281.673 3
 -7 1 -3 1776.88 290.166 1
 -7 -1 -4 138.906 69.0061 1
 7 -1 4 119.137 101.855 3
 -7 1 -4 313.186 129.983 1
 7 -1 5 5174.27 600.485 3
 -7 1 -5 5135.46 474.129 1
 -7 -1 -5 5357.04 639.162 1
 -7 -1 -6 316.145 107.373 1
 7 -1 6 748.149 245.454 3
 -7 1 -6 725.836 178.437 1
 7 -1 7 3173.27 500.22 3
 -7 1 -7 2527.73 330.052 1
 7 -1 8 188.954 157.068 3
 -7 1 -8 76.4984 78.2103 1
 7 -1 9 3972.55 593.877 3
 -7 1 -9 4656.75 444.875 1
 7 -1 10 1939.59 436.171 3
 -7 1 -10 1995.6 296.356 1
 -7 1 -11 383.605 135.302 1
 7 -1 11 556.422 274.511 3
 7 -1 12 3545.82 622.105 3
 -7 1 -12 4177.62 421.736 1
 -7 1 -13 82.5828 95.2158 1
 7 -1 13 81.3412 101.361 3
 7 -1 14 237.258 183.044 3
 7 -1 15 -43.2458 155.057 3
 7 1 15 -53.6363 84.8677 3
 7 -1 16 503.836 253.216 3
 7 1 16 899.765 390.453 3
 7 -1 17 550.928 329.4 3
 7 1 17 473.824 278.598 3
 7 -1 18 481.592 247.29 3
 7 1 18 801.126 367.534 3
 7 -1 19 -74.0477 124.634 3
 7 1 19 295.242 224.24 3
 7 -1 20 57.6122 120.724 3
 7 1 20 116.551 177.985 3
 7 -1 21 255.473 242.67 3
 7 1 21 -113.617 158.549 3
 7 -1 22 738.908 370.922 3
 7 -2 -23 561.137 297 2
 7 -2 -22 403.204 271.455 2
 7 -2 -21 -7.89188 133.669 2
 -7 2 21 -23.4984 104.732 1
 7 -2 -20 -127.978 179.213 2
 -7 2 20 312.875 189.784 1
 7 -2 -19 2463.54 619.216 2
 -7 2 19 2962.43 493.811 1
 7 -2 -18 3226.24 705.218 2
 -7 2 18 4054.25 557.577 1
 7 -2 -17 327.092 236.846 2
 -7 2 17 721.224 260.888 1
 7 -2 -16 3340.92 706.501 2
 -7 2 16 4244.23 546.485 1
 -7 2 15 12492.4 897.778 1
 7 -2 -15 11199.8 1281.98 2
 -7 2 14 9496.15 764.449 1
 7 -2 -14 8716.42 1101.13 2
 7 -2 -13 178.458 209.912 2
 -7 2 13 189.032 152.462 1
 7 -2 -12 292.579 184.817 2
 -7 2 12 1020.86 258.151 1
 -7 -2 12 754.128 261.792 4
 -7 2 11 506.24 171.201 1
 7 -2 -11 233.327 171.736 2
 -7 2 10 233.267 134.604 1
 7 -2 -10 -79.418 189.171 2
 7 -2 -9 4254.72 722.46 2
 -7 2 9 3778.36 449.723 1
 7 -2 -8 208.542 194.781 2
 -7 2 8 236.736 139.017 1
 -7 2 7 5289.64 524.537 1
 7 -2 -7 5032.22 764.929 2
 -7 2 6 10250 724.236 1
 7 -2 -6 10282.6 1081.76 2
 7 -2 -5 1396.73 403.272 2
 -7 2 5 1709.6 310.57 1
 -7 2 4 16000.6 903.523 1
 7 -2 -4 16436.2 1324.3 2
 -7 2 3 7810.48 635.696 1
 -7 2 2 10322.1 725.859 1
 -7 2 1 2526.29 369.695 1
 -7 2 0 4069.85 457.006 1
 7 -2 0 3082.33 443.415 4
 7 -2 1 269.598 136.658 4
 -7 2 -1 174.707 134.762 1
 7 -2 2 8222.82 625.644 3
 -7 2 -2 7994.78 650.16 1
 7 -2 2 9043.98 795.672 4
 7 -2 3 135.083 109.542 4
 7 -2 3 116.489 98.9458 3
 -7 2 -3 193.725 126.206 1
 7 -2 4 2026.52 399.708 4
 7 -2 4 2419.87 378.407 3
 -7 2 -4 1954.65 321.552 1
 7 -2 5 3924.18 508.433 3
 -7 2 -5 3430.5 429.214 1
 7 -2 5 4569.7 620.233 4
 7 -2 6 40688.1 1707.55 3
 -7 2 -6 38933.3 1426.39 1
 7 -2 6 41321.9 1870.45 4
 7 -2 7 2516.59 482.299 4
 7 -2 7 2324.54 423.614 3
 -7 2 -7 2532.51 371.157 1
 7 -2 8 1147.24 348.911 4
 7 -2 8 801.322 271.272 3
 -7 2 -8 1114.6 243.295 1
 7 -2 9 1537.65 358.516 3
 -7 2 -9 1843.47 316.392 1
 7 -2 10 2186.88 464.24 3
 -7 2 -10 2085.13 332.676 1
 7 -2 11 -14.4535 80.5527 3
 -7 2 -11 74.4884 44.908 1
 7 -2 12 519.81 257.39 3
 -7 2 -12 240.7 114.253 1
 7 -2 13 187.029 152.907 3
 -7 2 -13 214.972 124.159 1
 7 -2 14 1183.04 381.867 3
 -7 2 -14 1092.5 236.117 1
 7 -2 15 77.3808 73.6559 3
 7 -2 16 107.453 62.2312 3
 7 -2 17 16.1257 135.611 3
 7 -2 18 790.942 346.687 3
 7 2 18 95.2647 222.244 3
 7 -2 19 113.556 176.669 4
 7 -2 19 218.113 225.835 3
 7 2 19 222.152 237.248 3
 7 -2 20 -144.167 116.133 4
 7 -2 20 261.774 258.366 3
 7 2 20 -132.891 221.107 3
 7 -2 21 148.541 177.299 4
 7 -2 21 290.595 214.169 3
 7 -2 22 -201.425 208.5 3
 7 -3 -21 -26.0911 129.42 2
 7 3 -20 -0.26785 145.81 5
 7 -3 -20 -208.697 224.691 2
 -7 3 20 210.992 167.073 1
 7 3 -19 439.016 240.459 5
 7 -3 -19 472.163 294.751 2
 -7 3 19 313.379 153.098 1
 7 3 -18 420.154 238.19 5
 7 -3 -18 199.114 109.738 2
 -7 3 18 339.084 156.597 1
 7 3 -17 2870.32 565.848 5
 -7 3 17 2585.64 409.498 1
 7 -3 -17 1746.02 567.49 2
 7 3 -16 6559.51 833.379 5
 7 -3 -16 5636.49 1012 2
 -7 3 16 6106.65 615.559 1
 -7 3 15 501.305 192.223 1
 7 3 -15 735.489 306.629 5
 7 -3 -15 -103.734 220.226 2
 -7 -3 15 71.2415 159.952 4
 7 3 -14 13047.6 1159.27 5
 -7 -3 14 12586.7 1329.25 4
 -7 3 14 13658.1 897.148 1
 7 -3 -14 12426.7 1463.41 2
 7 3 -13 426.235 268.943 5
 -7 -3 13 454.095 285.479 4
 -7 3 13 474.339 204.427 1
 7 3 -12 5943.33 788.573 5
 -7 -3 12 5163.19 822.589 4
 -7 3 12 6515.33 616.011 1
 7 3 -11 4392.23 665.28 5
 -7 -3 11 3767.8 701.659 4
 -7 3 11 4971.5 543.486 1
 7 3 -10 1417.56 366.117 5
 -7 3 10 2474.15 379.886 1
 7 3 -9 904.983 313.674 5
 -7 3 9 879.74 232.416 1
 -7 3 8 5269.73 567.598 1
 7 3 -8 5336.1 715.519 5
 7 3 -7 2653.08 507.626 5
 -7 3 7 2750.11 414.537 1
 7 3 -6 10608.6 983.868 5
 -7 3 6 10136.7 790.084 1
 7 3 -5 436.789 226.944 5
 -7 3 5 754.527 226.861 1
 7 3 -4 572.127 234.995 5
 -7 3 4 840.824 240.032 1
 7 3 -3 2570.93 473.54 5
 -7 3 3 2012.6 370.724 1
 7 3 -2 8733.7 847.403 5
 -7 3 2 9684.7 812.513 1
 7 3 -1 1018.64 302.94 5
 -7 3 1 767.788 223.337 1
 7 3 0 4545.98 593.248 5
 -7 3 0 4788.44 579.228 1
 7 3 1 140.345 147.589 5
 -7 3 -1 -72.3805 72.203 1
 7 3 2 57.807 127.307 5
 -7 3 -2 -346.764 221.493 1
 7 -3 2 -215.765 150.554 4
 -7 3 -3 -2.0059 70.0993 1
 7 -3 3 5.46145 76.9053 4
 7 -3 4 710.374 279.702 4
 -7 3 -4 662.16 182.26 1
 -7 3 -5 4490.7 584.192 1
 7 -3 5 4948.8 749.819 4
 7 -3 6 1031.53 355.784 4
 -7 3 -6 964.884 259.718 1
 7 -3 7 473.999 251.139 4
 -7 3 -7 294.555 197.202 1
 -7 3 -8 8990.58 847.688 1
 7 -3 8 9018.64 1067.76 4
 7 -3 9 4556.8 776.506 4
 -7 3 -9 4992.11 628.099 1
 -7 3 -10 4896.58 623.43 1
 7 -3 10 5177.13 844.399 4
 7 -3 11 2907.02 635.576 4
 -7 3 -11 3554.61 536.084 1
 7 -3 12 1656.93 491.101 4
 -7 3 -12 1301.71 305.961 1
 7 -3 12 1301.37 396.197 3
 7 -3 13 640.84 325.097 4
 7 -3 13 753.47 320.48 3
 -7 3 -13 398.442 170.352 1
 7 -3 14 324.014 257.923 4
 7 -3 14 367.202 227.073 3
 -7 3 -14 223.038 113.75 1
 7 -3 15 45.055 65.343 4
 7 -3 15 -101.566 179.212 3
 -7 3 -15 70.8349 83.1963 1
 7 -3 16 99.3875 139.233 4
 7 -3 16 341.924 203.538 3
 7 -3 17 165.01 199.366 4
 7 -3 17 201.204 178.57 3
 7 -3 18 1195.59 472.57 4
 7 -3 18 780.041 355.346 3
 7 -3 19 627.777 344.482 4
 7 -3 19 103.562 76.1115 3
 7 -3 20 -293.821 243.541 3
 7 -3 21 355.672 266.698 3
 -7 4 19 776.628 240.039 1
 7 4 -19 513.668 253.24 5
 -7 4 18 235.074 149.631 1
 7 4 -18 176.979 198.667 5
 7 4 -17 221.402 209.276 5
 -7 4 17 406.166 176.749 1
 7 4 -16 519.421 273.59 5
 -7 -4 16 154.653 164.557 4
 -7 4 16 422.828 173.031 1
 7 4 -15 640.397 309.678 5
 -7 -4 15 429.524 301.313 4
 -7 4 15 847.933 241.449 1
 7 4 -14 692.166 293.108 5
 -7 -4 14 585.279 322.069 4
 -7 4 14 395.482 159.765 1
 7 4 -13 39.0756 93.4709 5
 -7 4 13 250.575 163.758 1
 -7 -4 13 340.999 281.132 4
 7 4 -12 113.373 169.997 5
 -7 4 12 165.127 130.723 1
 -7 -4 12 -215.804 197.868 4
 7 4 -11 272.464 217.009 5
 -7 4 11 334.299 143.557 1
 -7 -4 11 794.196 356.196 4
 7 4 -10 221.945 181.7 5
 -7 4 10 92.3702 82.0202 1
 7 4 -9 87.4476 126.879 5
 -7 4 9 139.334 118.739 1
 7 4 -8 81.4231 92.8784 5
 -7 4 8 50.9768 57.0731 1
 7 4 -7 346.241 230.242 5
 -7 4 7 649.132 230.889 1
 7 4 -6 22.2658 116.035 5
 -7 4 6 -161.352 136.59 1
 7 4 -5 720.689 301.214 5
 -7 4 5 386.889 213.355 1
 7 4 -4 4905.67 759.074 5
 -7 4 4 5454.43 706.084 1
 7 4 -3 442.783 248.675 5
 -7 4 3 332.561 209.586 1
 7 4 -2 1031.77 364.102 5
 -7 4 2 1005.6 287.448 1
 7 4 -1 29.0891 125.186 5
 -7 4 1 31.6797 70.4539 1
 7 4 0 819.463 305.321 5
 -7 4 0 362.595 164.203 1
 7 4 1 330.225 200.511 5
 -7 4 -1 377.997 203.629 1
 7 4 2 41.1111 161.268 5
 -7 4 -2 7.23407 98.8957 1
 7 4 3 -12.5976 69.7608 5
 -7 4 -3 146.103 187.561 1
 7 4 4 272.334 120.348 5
 -7 4 -4 456.986 237.384 1
 7 4 5 67.5364 54.7536 5
 -7 4 -5 165.573 183.47 1
 7 4 6 811.016 255.795 5
 -7 4 -6 742.599 314.473 1
 7 -4 6 1017.41 414.319 4
 7 4 7 1316.93 317.808 5
 -7 4 -7 1115.88 366.823 1
 7 -4 7 898.524 361.434 4
 -7 4 -8 1173.93 521.278 1
 7 -4 8 387.694 275.527 4
 -7 4 -9 7657.17 948.388 1
 7 -4 9 7708.71 1149.5 4
 -7 4 -10 301.483 191.869 1
 7 -4 10 87.7386 160.889 4
 -7 4 -11 -166.239 131.644 1
 7 -4 11 10.189 111.462 4
 -7 4 -12 109.698 130.934 1
 7 -4 12 -67.5027 129.124 4
 7 -4 13 186.65 196.223 4
 -7 4 -13 328.077 206.962 1
 7 -4 14 99.0367 115.037 4
 -7 4 -14 350.497 219.289 1
 -7 4 -14 261.718 338.04 5
 7 -4 15 77.1889 69.9307 4
 -7 4 -15 306.524 191.371 1
 7 -4 16 410.539 333.033 4
 7 -4 17 162.898 175.277 4
 -7 -5 17 -141.137 192.056 4
 -7 5 17 545.089 208.875 1
 -7 -5 16 161.854 111.507 4
 -7 5 16 -44.2632 53.2958 1
 -7 5 15 116.654 128.632 1
 -7 -5 15 25.8251 93.8158 4
 -7 5 14 306.303 170.844 1
 -7 -5 14 369.427 335.479 4
 7 5 -13 1601.65 537.419 5
 -7 5 13 1438.1 341.631 1
 -7 -5 13 1865.32 624.527 4
 7 5 -12 52.9669 185.383 5
 -7 5 12 201.088 123.709 1
 -7 -5 12 270.717 236.226 4
 7 5 -11 284.7 238.216 5
 -7 5 11 -278.163 184.847 1
 -7 -5 11 -44.8103 165.698 4
 7 5 -10 1666.23 539.806 5
 -7 5 10 1168.47 329.926 1
 7 5 -9 1095.39 434.048 5
 -7 5 9 845.806 303.361 1
 7 5 -8 35.5681 192.644 5
 -7 5 8 105.955 158.171 1
 7 5 -7 1233.03 440.095 5
 -7 5 7 150.092 152.04 1
 7 5 -6 1102.59 417.488 5
 -7 5 6 326.632 142.654 1
 7 5 -5 465.24 297.972 5
 -7 5 5 455.71 267.784 1
 7 5 -4 133.399 148.927 5
 -7 5 4 212.063 186.873 1
 7 5 -3 2240.52 569.688 5
 -7 5 3 2481.51 568.967 1
 -7 5 2 1500.42 459.464 1
 7 5 -2 1095.54 395.859 5
 -7 5 1 263.476 189.169 1
 7 5 -1 626.747 318.16 5
 -7 5 0 142.348 182.531 1
 7 5 0 449.99 246.908 5
 -7 5 -1 105.126 129.024 1
 7 5 1 115.074 142.899 5
 -7 5 -2 475.889 276.803 1
 7 5 2 459.115 265.6 5
 -7 5 -3 757.97 343.323 1
 7 5 3 604.243 291.482 5
 -7 5 -4 302.971 214.519 1
 7 5 4 744.408 318.479 5
 -7 5 -5 150.643 150.784 1
 7 5 5 144.826 164.18 5
 -7 5 -6 313.703 219.357 1
 -7 5 -7 76.4871 121.068 1
 -7 5 -8 111.964 150.952 1
 -7 5 -9 1645.27 525.716 1
 -7 5 -10 230.392 178.035 1
 -7 5 -11 380.107 281.342 1
 -7 5 -11 993.706 636.383 5
 7 -5 11 210.013 250.242 4
 -7 5 -12 399.3 249.57 1
 -7 5 -12 1224.71 796.03 5
 7 -5 12 645.823 417.291 4
 -7 5 -13 2.78262 130.22 1
 -7 5 -13 -86.7478 241.366 5
 7 -5 13 -24.2482 108.431 4
 -7 5 -14 23.5928 169.278 1
 -7 5 -14 328.577 421.451 5
 7 -5 14 -165.898 209.394 4
 7 6 -4 981.09 438.998 5
 7 6 -3 381.536 283.186 5
 7 6 -2 819.172 412.904 5
 7 6 -1 100.668 162.41 5
 7 6 0 343.39 253.486 5
 7 6 1 275.751 214.404 5
 7 6 2 549.65 335.201 5
 7 6 3 2055.83 549.084 5
 8 0 -23 158.11 170.526 2
 8 0 -22 3575.47 664.982 2
 8 0 -21 168.78 140.574 2
 8 0 -20 58.7736 80.6953 2
 8 0 -19 -144.728 138.875 2
 8 0 -18 604.261 252.744 2
 8 0 -17 -60.6783 56.3725 2
 8 0 -16 1910.86 415.33 2
 8 0 -15 49.9654 79.8286 2
 -8 0 14 -274.193 226.71 1
 8 0 -14 200.765 136.108 2
 -8 0 13 -870.297 312.614 1
 8 0 -13 -4.91478 68.8411 2
 -8 0 12 121.988 122.306 1
 8 0 -12 436.172 194.148 2
 -8 0 11 -206.379 181.427 1
 8 0 -11 72.9616 126.338 2
 8 0 -10 8440.64 764.186 2
 -8 0 10 7693.05 846.456 1
 -8 0 9 13.1059 90.4231 1
 8 0 -9 29.709 66.8919 2
 8 0 -8 13523.3 929.809 2
 -8 0 8 13179.5 1073.41 1
 8 0 -7 11.9158 61.4088 2
 -8 0 7 -74.3375 130.19 1
 8 0 -6 6314.34 615.836 2
 -8 0 6 6161.92 700.777 1
 -8 0 5 -85.3166 115.774 1
 8 0 -5 140.06 83.6249 2
 8 0 -4 5973.1 592.37 2
 -8 0 4 6354.85 692.453 1
 -8 0 3 12.4284 62.5056 1
 8 0 -3 69.1024 77.8911 2
 -8 0 2 1360.18 301.083 1
 8 0 -2 1737.45 315.597 2
 -8 0 1 -6.29134 99.6517 1
 8 0 -1 192.116 116.317 2
 8 0 0 146.979 107.137 2
 -8 0 0 -90.3185 137.342 1
 8 0 1 126.85 94.0662 2
 -8 0 -1 -4.78289 88.5979 1
 -8 0 -2 2637.98 415.766 1
 -8 0 -3 60.6665 106.172 1
 -8 0 -4 292.123 133.16 1
 -8 0 -5 -100.528 106.952 1
 -8 0 -6 2060.25 368.474 1
 -8 0 -7 50.17 46.4246 1
 -8 0 -8 313.04 142.679 1
 -8 0 -9 89.8898 104.616 1
 -8 0 -10 1130.91 275.747 1
 8 0 10 1160.27 362.636 3
 -8 0 -11 -59.5642 107.817 1
 8 0 11 39.5014 102.732 3
 8 0 12 1732.34 473.927 3
 8 0 13 212.377 196.375 3
 8 0 14 -9.57333 77.4594 3
 8 0 15 54.0245 129.955 3
 8 0 16 1735.97 522.467 3
 8 0 17 37.9816 124.255 3
 8 0 18 350.496 249.681 3
 8 0 19 37.438 77.4004 3
 8 0 20 53.1036 114.756 3
 8 -1 -22 1032.39 420.25 2
 8 1 -22 739.385 269.677 2
 8 1 -21 7060.25 800.433 2
 8 -1 -21 7017.19 1051.27 2
 8 -1 -20 539.246 281.322 2
 -8 1 20 -448.552 283.535 1
 8 -1 -19 354.8 255.514 2
 -8 1 19 -281.838 227.265 1
 8 -1 -18 1169.02 406.766 2
 -8 1 18 596.007 213.364 1
 8 -1 -17 1153.76 388.212 2
 -8 1 17 1207.02 323.991 1
 8 -1 -16 300.527 197.012 2
 -8 1 16 313.075 152.595 1
 8 -1 -15 170.023 154.949 2
 -8 1 15 218.403 107.716 1
 8 -1 -14 416.671 217.754 2
 -8 1 14 53.0434 127.333 1
 8 -1 -13 254.027 190.602 2
 -8 1 13 382.285 209.95 1
 8 -1 -12 2230.84 498.092 2
 -8 1 12 2156.4 413.987 1
 -8 1 11 655.628 247.013 1
 8 -1 -11 439.159 227.155 2
 -8 1 10 8647.76 799.416 1
 8 -1 -10 8519.17 948.177 2
 8 -1 -9 1064.37 331.697 2
 -8 1 9 815.747 245.845 1
 8 -1 -8 32.3175 75.6791 2
 -8 1 8 221.138 114.854 1
 8 -1 -7 -113.958 173.617 2
 -8 1 7 186.857 159.428 1
 8 -1 -6 358.963 177.49 2
 -8 1 6 471.325 203.417 1
 8 -1 -5 82.6702 87.7509 2
 -8 1 5 480.249 188.762 1
 8 -1 -4 150.088 125.219 2
 -8 1 4 38.1478 70.9138 1
 8 -1 -3 241.829 158.144 2
 -8 1 3 507.191 190.815 1
 8 -1 -2 1283.2 339.947 2
 -8 1 2 1508.53 312.542 1
 8 -1 -1 62.8201 62.6083 2
 -8 1 1 400.692 183.629 1
 -8 1 0 5857.51 580.088 1
 -8 -1 0 4908.36 678.57 1
 8 -1 0 5635.47 687.263 2
 -8 -1 -1 1919.93 402.452 1
 -8 1 -1 3415.26 437.631 1
 -8 1 -2 2183.38 353.458 1
 8 -1 2 2088.06 378.019 3
 -8 -1 -2 1589.06 363.522 1
 8 -1 3 33516.6 1535.31 3
 -8 1 -3 33874.8 1357.88 1
 -8 -1 -3 32544.5 1743.21 1
 8 -1 4 18613.9 1178.24 3
 -8 1 -4 18558.7 1004.12 1
 8 -1 5 5258.15 650.348 3
 -8 1 -5 5352.71 545.468 1
 8 -1 6 4574.92 623.3 3
 -8 1 -6 4429.54 490.306 1
 -8 1 -7 919.859 246.238 1
 8 -1 7 696.875 256.633 3
 8 -1 8 4084.95 622.381 3
 -8 1 -8 4296.18 481.852 1
 8 -1 9 4639.05 682.275 3
 -8 1 -9 5280.27 527.24 1
 8 -1 10 4948.79 732.667 3
 -8 1 -10 3855.25 452.635 1
 -8 1 -11 177.725 128.091 1
 8 -1 11 119.638 132.57 3
 -8 1 -12 224.683 140.557 1
 8 -1 12 193.29 174.392 3
 8 -1 13 2305.61 538.803 3
 8 -1 14 1482.03 442.867 3
 8 -1 15 333.362 218.599 3
 8 1 15 135.485 66.7978 3
 8 -1 16 55.3694 115.876 3
 8 1 16 396.241 292.662 3
 8 -1 17 3.04241 94.8285 3
 8 1 17 391.57 295.563 3
 8 -1 18 59.6342 149.522 3
 8 1 18 35.5106 82.0357 3
 8 -1 19 -108.591 198.146 3
 8 1 19 377.952 295.863 3
 8 -1 20 269.952 263.029 3
 8 -2 -21 95.2129 174.95 2
 -8 2 21 40.3379 95.133 1
 8 -2 -20 -361.361 270.274 2
 -8 2 20 -76.5553 118.632 1
 8 -2 -19 2848.6 724.212 2
 -8 2 19 3558.92 586.453 1
 8 -2 -18 340.631 229.171 2
 -8 2 18 1616.07 384.736 1
 -8 2 17 1060.84 316.938 1
 8 -2 -17 261.117 213.236 2
 -8 2 16 6874.83 750.669 1
 8 -2 -16 8835.27 1219.6 2
 8 -2 -15 364.94 259.613 2
 -8 2 15 775.2 254.599 1
 8 -2 -14 898.157 373.998 2
 -8 2 14 676.495 245.758 1
 8 -2 -13 562.859 257.551 2
 -8 2 13 977.991 274.647 1
 8 -2 -12 2623.59 624.14 2
 -8 2 12 2428.79 416.43 1
 8 -2 -11 1166.21 427.805 2
 -8 2 11 1335.51 303.959 1
 8 -2 -10 731.118 323.947 2
 -8 2 10 392.758 185.1 1
 -8 2 9 232.03 151.964 1
 8 -2 -9 1.02549 98.1776 2
 -8 2 8 354.205 152.405 1
 8 -2 -8 -80.2962 121.381 2
 8 -2 -7 3502.3 672.991 2
 -8 2 7 4118.32 496.37 1
 -8 2 6 647.509 206.679 1
 8 -2 -6 -31.4243 177.345 2
 8 -2 -5 1476.14 426.493 2
 -8 2 5 2045.92 352.75 1
 -8 2 4 37.6103 80.3377 1
 -8 2 3 3291.17 439.691 1
 -8 2 2 4008.33 485.142 1
 -8 2 1 11200.4 797.149 1
 -8 2 0 1679.57 317.744 1
 -8 2 -1 1616.92 313.638 1
 -8 2 -2 6669.5 621.802 1
 -8 2 -3 20371.3 1072.49 1
 -8 2 -4 1577.72 310.016 1
 8 -2 5 1746.63 399.325 4
 -8 2 -5 1915.16 332.104 1
 8 -2 6 1513.72 375.068 4
 -8 2 -6 1998.14 331.413 1
 8 -2 7 203.4 201.735 4
 -8 2 -7 277.272 136.568 1
 8 -2 8 726.951 264.917 4
 -8 2 -8 1071.97 251.406 1
 8 -2 9 399.356 219.245 4
 -8 2 -9 673.245 198.686 1
 8 -2 10 505.511 267.696 4
 8 -2 10 866.879 300.689 3
 -8 2 -10 801.689 215.623 1
 8 -2 11 12.1808 78.949 3
 -8 2 -11 97.4124 92.9371 1
 8 -2 12 709.627 308.204 3
 -8 2 -12 666.276 197.884 1
 8 -2 13 329.585 221.587 3
 -8 2 -13 149.481 124.658 1
 8 -2 14 111.294 193.475 3
 8 -2 15 360.32 237.311 3
 8 -2 16 96.4327 153.801 3
 8 -2 17 448.959 275.558 4
 8 -2 17 410.767 213.271 3
 8 -2 18 -231.928 205.516 4
 8 -2 18 -11.814 114.034 3
 8 2 18 298.524 265.743 3
 8 -2 19 152.953 231.786 4
 8 -2 19 446.639 319.308 3
 8 -2 20 1276.11 492.284 3
 -8 3 20 719.729 269.819 1
 8 -3 -19 -179.524 232.309 2
 -8 3 19 210.66 138.367 1
 8 -3 -18 1651.17 578.099 2
 -8 3 18 1838.3 388.427 1
 8 -3 -17 538.787 315.2 2
 -8 3 17 1578.38 350.418 1
 8 -3 -16 386.359 237.259 2
 -8 3 16 471.824 203.921 1
 -8 3 15 884.903 270.295 1
 8 -3 -15 368.352 302.165 2
 -8 3 14 14301 996.418 1
 -8 3 13 692.627 248.619 1
 -8 3 12 798.341 247.553 1
 8 3 -12 381.467 205.453 5
 8 3 -11 2360.57 484.535 5
 -8 3 11 2249.53 384.871 1
 8 3 -10 489.263 231.332 5
 -8 3 10 553.923 221.788 1
 8 3 -9 73.4059 133.398 5
 -8 3 9 194.342 135.674 1
 8 3 -8 887.046 295.724 5
 -8 3 8 1135.76 276.02 1
 8 3 -7 1398.27 367.352 5
 -8 3 7 1113.48 266.303 1
 -8 3 6 688.536 226.078 1
 -8 3 5 99.2385 109.751 1
 -8 3 4 302.682 129.823 1
 -8 3 3 1075.13 278.806 1
 -8 3 2 5083.81 590.772 1
 -8 3 1 4434.5 552.267 1
 -8 3 0 4976.12 584.014 1
 -8 3 -1 2417.59 415.596 1
 -8 3 -2 36.143 65.3701 1
 -8 3 -3 532.2 184.124 1
 -8 3 -4 1049.76 272.609 1
 -8 3 -5 20.3922 82.5187 1
 -8 3 -6 190.151 142.283 1
 -8 3 -7 1872.6 379.367 1
 8 -3 8 844.787 341.176 4
 -8 3 -8 1340.2 324.341 1
 8 -3 9 -48.5248 99.3657 4
 -8 3 -9 204.251 121.711 1
 8 -3 10 762.712 313.995 4
 -8 3 -10 489.486 188.063 1
 8 -3 11 -131.663 195.305 4
 -8 3 -11 -175.84 116.213 1
 8 -3 12 469.79 260.741 4
 -8 3 -12 628.928 206.846 1
 8 -3 13 312.558 228.69 4
 -8 3 -13 232.629 124.622 1
 8 -3 14 94.6493 133.091 4
 -8 3 -14 190.96 131.663 1
 8 -3 15 1542.3 511.806 4
 8 -3 16 523.449 341.336 4
 8 -3 17 135.026 174.433 4
 8 -3 18 -8.31978 68.7934 4
 -8 4 19 274.54 153.226 1
 -8 4 18 452.352 204.96 1
 -8 4 17 1062.62 293.256 1
 -8 4 16 624.074 230.437 1
 8 4 -15 351.449 215.541 5
 -8 4 15 585.672 220.166 1
 8 4 -14 1016 377.311 5
 -8 4 14 1156.82 308.582 1
 8 4 -13 5089.71 802.333 5
 -8 4 13 4719.23 589.992 1
 8 4 -12 1583 453.927 5
 -8 4 12 1485.62 341.833 1
 8 4 -11 345.177 207.318 5
 -8 4 11 687.298 233.256 1
 8 4 -10 136.959 155.025 5
 -8 4 10 213.662 155.221 1
 8 4 -9 208.013 193.143 5
 -8 4 9 163.811 121.584 1
 8 4 -8 26.2541 82.4869 5
 -8 4 8 130.537 97.7862 1
 8 4 -7 209.674 204.324 5
 -8 4 7 228.697 167.441 1
 8 4 -6 -113.377 142.213 5
 -8 4 6 111.878 106.712 1
 8 4 -5 601.381 274.909 5
 -8 4 5 607.42 229.599 1
 8 4 -4 2171.84 480.835 5
 -8 4 4 2342.65 443.455 1
 8 4 -3 364.575 190.047 5
 -8 4 3 173.452 110.965 1
 8 4 -2 379.578 217.337 5
 -8 4 2 -47.8811 84.1114 1
 8 4 -1 2282.94 471.949 5
 -8 4 1 2122.89 446.724 1
 8 4 0 1337.66 370.001 5
 -8 4 0 1216.69 316.71 1
 8 4 1 184.162 142.953 5
 -8 4 -1 115.773 99.1074 1
 8 4 2 148.379 137.247 5
 -8 4 -2 -136.186 127.66 1
 8 4 3 87.0068 94.6323 5
 -8 4 -3 -66.5816 133.352 1
 -8 4 -4 -202.607 231.435 1
 -8 4 -5 2075.25 462.855 1
 -8 4 -6 48.7813 70.6443 1
 -8 4 -7 32.0526 115.682 1
 -8 4 -8 338.533 172.008 1
 -8 4 -9 7789.71 891.052 1
 -8 4 -10 288.386 175.116 1
 -8 4 -11 297.557 178.792 1
 -8 4 -12 -9.2897 83.2846 1
 -8 4 -13 -86.0954 134.23 1
 8 -4 13 -13.7823 84.7788 4
 8 -4 14 69.2179 132.201 4
 -8 4 -14 -1.71322 108.559 1
 8 -4 15 574.532 362.219 4
 -8 5 13 898.111 284.755 1
 -8 5 12 729.468 253.672 1
 -8 5 11 153.766 148.296 1
 -8 5 10 628.421 256.547 1
 8 5 -9 74.3653 137.425 5
 -8 5 9 121.334 117.25 1
 8 5 -8 448.695 234.621 5
 -8 5 8 823.292 294.675 1
 8 5 -7 1275.85 438.228 5
 -8 5 7 1347.23 376.254 1
 8 5 -6 231.637 198.93 5
 -8 5 6 106.129 157.07 1
 8 5 -5 219.964 163.992 5
 -8 5 5 327.71 174.991 1
 8 5 -4 338.645 233.123 5
 -8 5 4 546.349 244.728 1
 8 5 -3 577.323 296.952 5
 -8 5 3 259.145 187.606 1
 8 5 -2 242.785 182.481 5
 -8 5 2 89.5317 118.563 1
 8 5 -1 660.192 316.273 5
 -8 5 1 142.025 145.225 1
 8 5 0 107.983 124.955 5
 -8 5 0 -332.437 265.789 1
 8 5 1 388.82 243.145 5
 -8 5 -1 -24.1234 79.4662 1
 8 5 2 269.13 188.406 5
 -8 5 -2 -242.744 263.951 1
 8 5 3 4.59606 118.79 5
 -8 5 -3 -288.741 271.349 1
 -8 5 -4 -220.805 195.911 1
 -8 5 -5 -123.993 107.643 1
 9 0 -20 187.812 117.461 2
 9 0 -19 213.64 196.762 2
 9 0 -18 1029.94 337.723 2
 9 0 -17 36.9546 88.5027 2
 9 0 -16 134.564 161.514 2
 9 0 -15 -88.865 145.759 2
 9 0 -14 221.458 173.377 2
 -9 0 13 -241.558 269.309 1
 9 0 -13 -20.2631 102.093 2
 9 0 -12 5826.72 733.987 2
 -9 0 12 5268.59 808.321 1
 -9 0 11 -210.686 249.787 1
 9 0 -11 117.222 134.822 2
 -9 0 10 1272.03 370.141 1
 9 0 -10 1612.76 378.417 2
 -9 0 9 155.164 161.698 1
 9 0 -9 321.173 169.108 2
 -9 0 8 173.175 125.177 1
 9 0 -8 582.434 220.45 2
 -9 0 7 -69.9422 156.801 1
 9 0 -7 -57.0934 108.424 2
 -9 0 6 2385.96 486.549 1
 9 0 -6 2627.04 455.655 2
 -9 0 5 -128.71 107.323 1
 9 0 -5 89.0666 65.3495 2
 -9 0 4 1371.6 350.65 1
 9 0 -4 1686.13 363.269 2
 9 0 -3 -31.7039 71.7837 2
 -9 0 3 -237.996 178.503 1
 9 0 -2 1189.06 301.343 2
 -9 0 2 1256.68 338.194 1
 -9 0 1 -211.253 147.683 1
 -9 0 0 496.594 187.577 1
 -9 0 -1 97.8559 105.22 1
 -9 0 -2 6591.12 739.294 1
 -9 0 -3 -74.0475 65.577 1
 -9 0 -4 1484.09 344.442 1
 -9 0 -5 46.6179 83.6994 1
 -9 0 -6 9915.19 899.023 1
 -9 0 -7 61.3463 82.0997 1
 -9 0 -8 5953.89 700.51 1
 9 0 9 11.7949 85.1834 3
 -9 0 -9 -56.8467 132.886 1
 9 0 10 2136.62 522.348 3
 -9 0 -10 2154.72 410.832 1
 9 0 11 244.134 221.155 3
 9 0 12 2023.28 531.891 3
 9 0 13 24.3526 137.315 3
 9 0 14 377.883 269.149 3
 9 0 15 -278.351 231.325 3
 9 0 16 239.22 205.885 3
 9 0 17 -53.4972 98.6328 3
 9 0 18 18.0912 79.9039 3
 9 -1 -20 171.614 243.295 2
 9 1 -20 332.083 210.818 2
 9 -1 -19 973.759 414.119 2
 -9 1 19 105.123 99.2977 1
 9 1 -19 657.611 268.114 2
 9 -1 -18 4740.69 861.413 2
 -9 1 18 3926.76 727.632 1
 9 1 -18 4477.13 631.67 2
 9 -1 -17 14.5493 78.4711 2
 9 1 -17 182.819 145.126 2
 9 -1 -16 129.034 184.114 2
 -9 1 16 201.635 80.5371 1
 9 1 -16 358.603 205.229 2
 9 -1 -15 936.146 365.874 2
 -9 1 15 402.223 232.822 1
 9 -1 -14 -45.2998 97.0438 2
 -9 1 14 -16.0788 84.7905 1
 9 -1 -13 505.723 277.639 2
 -9 1 13 81.5385 123.346 1
 9 -1 -12 2308.51 552.927 2
 -9 1 12 1809.56 418.062 1
 9 -1 -11 2564.87 576.915 2
 -9 1 11 2568.55 490.384 1
 9 -1 -10 767.853 306.591 2
 -9 1 10 1313.74 378.966 1
 -9 1 9 -95.6633 121.621 1
 9 -1 -9 26.3177 101.338 2
 -9 1 8 571.506 241.581 1
 9 -1 -8 346.631 170.54 2
 9 -1 -7 1239.8 369.428 2
 -9 1 7 1616.02 363.609 1
 9 -1 -6 145.371 141.38 2
 -9 1 6 75.5737 113.733 1
 9 -1 -5 2432.2 516.405 2
 -9 1 5 3442.58 514.02 1
 9 -1 -4 339.791 213.095 2
 -9 1 4 430.6 199.051 1
 9 -1 -3 -69.3941 109.771 2
 -9 1 3 58.6157 103.696 1
 9 1 -3 218.535 111.745 2
 9 -1 -2 -31.9346 42.8326 2
 -9 1 2 331.886 184.387 1
 9 1 -2 240.796 115.316 2
 -9 1 1 369.826 169.31 1
 -9 1 0 3437.6 491.716 1
 -9 1 -1 1556.38 336.494 1
 -9 1 -2 398.454 211.936 1
 -9 1 -3 6652 670.017 1
 -9 1 -4 2920.98 442.876 1
 -9 1 -5 167.391 148.035 1
 -9 1 -6 1409.31 315.466 1
 -9 1 -7 968.385 265.61 1
 -9 1 -8 2302.17 389.316 1
 9 -1 9 3114.92 585.463 3
 -9 1 -9 3107.26 458.414 1
 -9 1 -10 476.116 181.407 1
 9 -1 10 658.481 277.835 3
 9 -1 11 622.077 279.147 3
 -9 1 -11 372.659 158.981 1
 9 -1 12 96.4008 111.608 3
 9 -1 13 1151.15 387.942 3
 9 -1 14 323.491 203.6 3
 9 1 14 468.632 249.582 3
 9 -1 15 88.7703 123.235 3
 9 1 15 227.752 205.714 3
 9 -1 16 -247.883 207.205 3
 9 1 16 -240.546 215.247 3
 9 -1 17 182.918 203.608 3
 9 1 17 407.431 291.243 3
 9 -1 18 112.475 144.76 3
 -9 2 21 -189.538 218.231 1
 -9 2 20 466.125 253.009 1
 9 -2 -19 3576.62 863.22 2
 -9 2 19 4225.42 696.464 1
 9 -2 -18 156.959 237.334 2
 -9 2 18 362.307 209.278 1
 9 -2 -17 652.251 351.151 2
 -9 2 17 608.987 244.715 1
 9 -2 -16 4008.7 862.995 2
 -9 2 16 4514.65 677.67 1
 -9 2 15 88.7052 154.09 1
 9 -2 -15 344.559 246.828 2
 9 -2 -14 935.853 390.431 2
 -9 2 14 877.322 300.874 1
 9 -2 -13 -48.2739 225.995 2
 -9 2 13 237.943 139.974 1
 9 -2 -12 161.048 181.864 2
 -9 2 12 145.712 129.625 1
 9 -2 -11 -156.965 231.4 2
 -9 2 11 80.2714 105.175 1
 9 -2 -10 17.0665 137.423 2
 -9 2 10 254.982 166.257 1
 9 -2 -9 51.4252 154.934 2
 -9 2 9 51.7072 82.0974 1
 9 -2 -8 484.831 269.212 2
 -9 2 8 749.379 249.408 1
 -9 2 7 386.81 186.068 1
 9 -2 -7 264.703 179.735 2
 -9 2 6 -31.0206 51.3522 1
 9 -2 -6 356.617 274.723 2
 -9 2 5 4.48171 68.8387 1
 -9 2 4 58.6182 57.1362 1
 -9 2 3 10.1867 77.866 1
 -9 2 2 2802.38 431.393 1
 -9 2 1 158.942 136.55 1
 -9 2 0 1800.84 348.924 1
 -9 2 -1 489.942 194.264 1
 -9 2 -2 720.697 229.79 1
 -9 2 -3 514.64 189.083 1
 -9 2 -4 2532.29 407.326 1
 -9 2 -5 1853.9 344.727 1
 -9 2 -6 389.851 142.65 1
 -9 2 -7 2197.75 374.889 1
 -9 2 -8 468.585 178.411 1
 -9 2 -9 1801.35 337.926 1
 -9 2 -10 1080.85 265.849 1
 -9 2 -11 600.903 199.884 1
 9 -2 11 651.94 287.272 4
 -9 2 -12 1579.69 313.287 1
 9 -2 12 1106.36 391.081 4
 9 -2 13 212.573 147.653 4
 9 -2 14 190.154 159.942 4
 9 -2 15 420.185 260.922 4
 9 -2 16 1491.54 494.632 4
 9 -2 17 464.171 289.632 4
 -9 3 20 -0.53049 91.1884 1
 -9 3 19 348.206 209.919 1
 -9 3 18 553.682 235.499 1
 -9 3 17 113.664 123.575 1
 -9 3 16 408.412 209.556 1
 -9 3 15 3030.48 516.998 1
 -9 3 14 411.75 208.175 1
 -9 3 13 367.374 179.594 1
 -9 3 12 1422.31 347.028 1
 -9 3 11 1705.55 400.327 1
 -9 3 10 806.263 259.953 1
 -9 3 9 873.24 266.91 1
 -9 3 8 411.142 192.729 1
 -9 3 7 549.972 210.987 1
 -9 3 6 855.261 262.411 1
 -9 3 5 152.802 144.948 1
 -9 3 4 3502.34 505.464 1
 -9 3 3 728.174 242.06 1
 -9 3 2 1446.82 331.242 1
 -9 3 1 173.939 143.971 1
 -9 3 0 1188.88 294.034 1
 -9 3 -1 456.879 196.148 1
 -9 3 -2 868.354 264.906 1
 -9 3 -3 2263.99 416.407 1
 -9 3 -4 1501.5 335.409 1
 -9 3 -5 1836.35 371.464 1
 -9 3 -6 448.298 186.366 1
 -9 3 -7 1760.11 356.668 1
 -9 3 -8 248.432 136.879 1
 -9 3 -9 441.568 191.191 1
 -9 3 -10 112.504 118.595 1
 -9 3 -11 215.388 149.271 1
 -9 3 -12 622.575 217.287 1
 -9 4 14 704.062 256.258 1
 -9 4 13 211.216 145.443 1
 -9 4 12 115.401 118.213 1
 -9 4 11 687.445 242.003 1
 9 4 -10 83.5958 109.049 5
 -9 4 10 197.683 163.177 1
 9 4 -9 425.911 237.878 5
 -9 4 9 1126.79 313.353 1
 9 4 -8 186.132 175.24 5
 -9 4 8 104.055 114.981 1
 9 4 -7 103.53 130.266 5
 -9 4 7 272.451 175.117 1
 -9 4 6 1253.95 331.842 1
 -9 4 5 240.06 144.788 1
 -9 4 4 375.437 166.19 1
 -9 4 3 107.458 64.7558 1
 -9 4 2 2622.4 478.9 1
 -9 4 1 -125.026 133.879 1
 -9 4 0 312.508 170.189 1
 -9 4 -1 332.146 189.069 1
 -9 4 -2 923.872 289.336 1
 -9 4 -3 426.481 218.593 1
 -9 4 -4 3166.14 546.638 1
 -9 4 -5 6902.12 806.098 1
 -9 4 -6 794.687 306.744 1
 -9 4 -7 1882.52 433.759 1
 -9 4 -8 92.9417 133.502 1
 -9 4 -9 920.947 304.213 1
 -9 4 -10 200.03 178.63 1
 -9 4 -11 -14.8763 107.032 1
 9 5 -3 517.113 284.792 5
 9 5 -2 331.049 226.698 5
 9 5 -1 683.08 310.699 5
 9 5 0 448.44 231.976 5
 9 5 1 661.417 281.366 5
 10 0 -18 -42.4143 123.44 2
 10 0 -17 -81.2329 116.54 2
 10 0 -16 191.937 162.974 2
 10 0 -15 -33.5765 129.969 2
 10 0 -14 63.1216 76.2395 2
 10 0 -13 -52.5977 80.6523 2
 -10 0 12 -860.003 357.92 1
 10 0 -12 362.041 194.232 2
 -10 0 11 -192.153 249.581 1
 10 0 -11 130.338 121.358 2
 -10 0 10 1649.98 477.189 1
 10 0 -10 2774.5 542.039 2
 -10 0 9 66.1153 163.441 1
 10 0 -9 164.07 163.996 2
 10 0 -8 289.014 198.818 2
 -10 0 8 -952.937 351.688 1
 10 0 -7 110.935 149.128 2
 -10 0 7 -210.1 205.553 1
 10 0 -6 1369.19 369.692 2
 -10 0 6 1208.1 366.344 1
 -10 0 5 -291.613 220.023 1
 -10 0 4 -183.421 248.618 1
 -10 0 3 -60.2162 153.88 1
 -10 0 2 1182.31 349.606 1
 -10 0 1 331.747 213.539 1
 -10 0 0 26662.2 1678.41 1
 -10 0 -1 244.173 170.627 1
 -10 0 -2 3261.96 573.368 1
 -10 0 -3 -211.667 166.546 1
 -10 0 -4 -73.0739 134.184 1
 -10 0 -5 -153.684 190.156 1
 -10 0 -6 -104.592 158.201 1
 -10 0 -7 -299.971 249.978 1
 -10 0 -8 -145.405 158.606 1
 -10 0 -9 -242.929 212.869 1
 10 0 9 -72.8298 62.3909 3
 10 0 10 1925.75 521.546 3
 10 0 11 5.79369 59.0967 3
 10 0 12 4650.87 844.793 3
 10 0 13 42.1931 95.0548 3
 10 0 14 1089.11 438.825 3
 10 0 15 280.281 203.408 3
 -10 1 18 -771.423 351.026 1
 10 -1 -17 -96.7222 176.58 2
 -10 1 17 -136.472 197.8 1
 10 1 -17 76.1243 123.678 2
 10 -1 -16 185.144 221.408 2
 10 1 -16 109.195 130.964 2
 -10 1 16 -375.721 306.768 1
 10 -1 -15 767.295 340.534 2
 -10 1 15 644.406 257.995 1
 10 1 -15 819.489 276.474 2
 10 -1 -14 552.53 301.97 2
 -10 1 14 326.408 195.562 1
 10 1 -14 411.597 192.994 2
 -10 1 13 -4.47691 63.0356 1
 10 -1 -13 46.9392 118.531 2
 10 1 -13 94.5226 134.514 2
 10 -1 -12 337.764 206.995 2
 10 1 -12 520.57 209.613 2
 -10 1 12 261.411 170.78 1
 10 -1 -11 -40.5522 69.823 2
 -10 1 11 -81.5894 56.2276 1
 10 -1 -10 -10.9566 118.132 2
 -10 1 10 38.7431 89.2489 1
 10 1 -10 75.9881 67.6671 2
 10 -1 -9 291.276 234.128 2
 -10 1 9 294.272 128.203 1
 10 1 -9 587.34 217.719 2
 10 -1 -8 336.377 196.829 2
 -10 1 8 52.7562 75.8763 1
 10 1 -8 203.604 127.46 2
 10 -1 -7 76.6222 138.319 2
 -10 1 7 110.621 165.715 1
 10 1 -7 114.375 100.782 2
 -10 1 6 72.7372 63.1236 1
 10 -1 -6 -90.1577 166.164 2
 10 1 -6 215.355 126.512 2
 -10 1 5 73.5335 81.086 1
 -10 1 4 313.708 218.149 1
 -10 1 3 -100.642 84.4492 1
 -10 1 2 112.851 170.536 1
 -10 1 1 5723.34 715.573 1
 -10 1 0 1926.03 416.853 1
 -10 1 -1 -74.8478 106.792 1
 -10 1 -2 6138.14 721.882 1
 -10 1 -3 937.779 296.064 1
 -10 1 -4 116.164 142.842 1
 -10 1 -5 46.3814 106.382 1
 -10 1 -6 326.737 228.641 1
 -10 1 -7 5674.94 685.452 1
 -10 1 -8 759.801 249.666 1
 -10 1 -9 395.04 191.225 1
 -10 1 -10 1132.35 312.39 1
 10 1 13 2501.31 654.451 3
 10 1 14 156.625 177.694 3
 -10 2 17 1456.4 439.563 1
 10 -2 -16 221.746 248.863 2
 -10 2 16 299.508 209.893 1
 10 -2 -15 190.269 208.091 2
 -10 2 15 250.551 158.723 1
 -10 2 14 1389.27 404.158 1
 10 -2 -14 819.352 442.271 2
 -10 2 13 952.993 335.717 1
 10 -2 -13 758.269 422.901 2
 10 -2 -12 581.477 269.022 2
 -10 2 12 744.653 275.81 1
 10 -2 -11 -320.084 254.317 2
 -10 2 11 -7.86878 82.9754 1
 10 -2 -10 -472.042 298.714 2
 -10 2 10 29.7852 88.6878 1
 10 -2 -9 -90.3051 135.905 2
 -10 2 9 93.3918 137.917 1
 10 -2 -8 -197.111 193.288 2
 -10 2 8 394.997 201.515 1
 10 -2 -7 128.386 100.823 2
 -10 2 7 728.024 265.251 1
 -10 2 6 981.494 308.52 1
 -10 2 5 220.757 160.342 1
 -10 2 4 486.789 211.937 1
 -10 2 3 1138.1 316.859 1
 -10 2 2 133.733 134.167 1
 -10 2 1 199.148 154.505 1
 -10 2 0 365.167 176.382 1
 -10 2 -1 761.429 251.112 1
 -10 2 -2 265.751 169.146 1
 -10 2 -3 134.775 123.442 1
 -10 2 -4 344.146 171.726 1
 -10 2 -5 -69.8902 95.1148 1
 -10 2 -6 41.9779 67.9729 1
 -10 2 -7 118.638 103.955 1
 -10 2 -8 1126.71 294.196 1
 -10 2 -9 231.153 137.841 1
 -10 2 -10 60.7236 46.4032 1
 -10 2 -11 89.9899 120.477 1
 -10 3 11 426.43 202.107 1
 -10 3 10 163.57 143.539 1
 -10 3 9 667.777 265.318 1
 -10 3 8 3258.42 528.492 1
 -10 3 7 1804.11 392.88 1
 -10 3 6 324.669 192.695 1
 -10 3 5 99.1798 107.643 1
 -10 3 4 1823.89 392.771 1
 -10 3 3 1178.14 312.889 1
 -10 3 2 36.7959 81.7727 1
 -10 3 1 558.361 222.903 1
 -10 3 0 420.092 190.381 1
 -10 3 -1 287.76 162.216 1
 -10 3 -2 634.379 242.221 1
 -10 3 -3 287.547 168.355 1
 -10 3 -4 156.277 123.111 1
 -10 3 -5 908.674 272.474 1
 -10 3 -6 591.224 229.398 1
 -10 3 -7 370.166 188.343 1
 -10 3 -8 481.888 205.576 1
 -10 3 -9 22.8455 85.4086 1
 -10 3 -10 103.476 123.932 1
 11 0 -15 162.841 208.521 2
 11 0 -14 969.368 378.689 2
 11 0 -13 97.1638 127.058 2
 11 0 -12 121.934 109.663 2
 11 0 -11 338.804 247.068 2
 11 0 -10 84.0136 123.634 2
 -11 0 10 -848.87 372.964 1
 -11 0 9 -172.162 217.032 1
 -11 0 8 -266.988 269.062 1
 -11 0 7 93.7526 120.986 1
 -11 0 6 409.238 184.807 1
 -11 0 5 -241.768 212.431 1
 -11 0 4 726.449 314.814 1
 -11 0 3 -88.221 203.874 1
 -11 0 2 1691.97 469.267 1
 -11 0 1 -249.087 208.026 1
 -11 0 0 6241.87 906.733 1
 -11 0 -1 -153.225 218.478 1
 -11 0 -2 -125.615 176.204 1
 -11 0 -3 -562.923 329.847 1
 -11 0 -4 -313.719 245.677 1
 -11 0 -5 -301.125 251.036 1
 -11 0 -6 -69.6615 159.452 1
 -11 0 -7 -221.847 245.482 1
 -11 0 -8 -510.668 263.232 1
 11 -1 -14 27.4596 97.8058 2
 11 1 -14 175.846 165.811 2
 11 -1 -13 407.54 289.641 2
 11 1 -13 365.463 219.544 2
 11 -1 -12 1411.03 498.079 2
 11 1 -12 1071.06 335.707 2
 11 -1 -11 -92.923 143.337 2
 11 1 -11 -26.9476 66.6112 2
 11 -1 -10 -231.199 204.382 2
 11 1 -10 -17.7262 39.6013 2
 -11 1 9 -0.93765 95.5612 1
 -11 1 8 374.497 182.003 1
 -11 1 7 328.382 227.079 1
 -11 1 6 186.39 174.892 1
 -11 1 5 786.164 306.608 1
 -11 1 4 86.2919 184.693 1
 -11 1 3 326.118 196.704 1
 -11 1 2 5372.16 769.626 1
 -11 1 1 103.844 171.043 1
 -11 1 0 56.2693 149.702 1
 -11 1 -1 604.074 263.804 1
 -11 1 -2 933.139 298.075 1
 -11 1 -3 777.597 285.192 1
 -11 1 -4 596.91 249.796 1
 -11 1 -5 524.406 240.403 1
 -11 1 -6 1032.28 341.534 1
 -11 1 -7 174.057 165.116 1
 -11 1 -8 126.659 109.964 1
 11 -2 -13 398.334 289.543 2
 11 -2 -12 -172.053 200.997 2
 11 -2 -11 74.215 198.751 2
 11 -2 -10 -219.71 222.226 2
 -11 2 2 283.751 191.842 1
 -11 2 1 145.523 141.523 1
 -11 2 0 195.178 145.591 1
 -11 2 -1 136.701 110.803 1
 -11 2 -2 505.952 245.344 1
 -11 2 -3 260.55 170.521 1
 -11 2 -4 456.371 228.913 1
 -11 2 -5 277.467 178.248 1
 -11 2 -6 417.242 197.868 1
 -11 2 -7 943.054 290.98 1
